# Scaling pattern of the carnivoran forelimb:

## Locomotor types, differential scaling and thoughts on a dying similarity.

Eloy Gálvez-López\*<sup>1</sup> & Adrià Casinos<sup>2</sup>

<sup>1</sup> *PalaeoHub, Department of Archaeology, University of York, Wentworth Way, YO10 5DD Heslington, York, United Kingdom*

<sup>2</sup> *University of Barcelona, Department of Evolutionary Biology, Ecology and Environmental Sciences (BEECA), Barcelona, Spain*

\* Corresponding author: [eloy.galvezlopez@york.ac.uk](mailto:eloy.galvezlopez@york.ac.uk)

### Abstract

The scaling pattern of the forelimb in Carnivora was determined using a sample of 30 variables measured on the scapula, humerus, radius, ulna, and third metacarpal, of 429 specimens belonging to 137 species of Carnivora. Standardized major axis regressions on body mass were calculated for all variables, using both traditional regression methods and phylogenetically independent contrasts (PIC). In agreement with previous studies on the scaling of the appendicular skeleton, conformity to either the geometric similarity hypothesis or the elastic similarity hypothesis was low. The scaling pattern of several phyletic lines and locomotor types within Carnivora was also determined, and significant deviations from the scaling pattern of the order were found in some of these subsamples. Furthermore, significant evidence for differential scaling was found for several variables, both in the whole sample and in various phylogenetic and locomotor subsamples. Contrary to previous studies, significant differences were found between the allometric exponents obtained with traditional and PIC regression methods, emphasizing the need to take into account phylogenetic relatedness in scaling studies. In light of these and previous results, we conclude that similarity hypotheses are too simplistic to describe scaling patterns in the carnivoran appendicular skeleton, and thus we propose that scaling hypotheses should be built from similarities in the scaling patterns of phylogenetically narrow samples of species with similar locomotor requirements. The present work is a first step in the study of those samples.

**Keywords:** biomechanics, Carnivora, differential scaling, forelimb, locomotor type, phylogenetically independent contrasts, scaling, similarity hypotheses.

## 38 Introduction

39

40 Size is one of the most important factors affecting the shape and function of the elements of the  
41 musculoskeletal system of animals, as well as the parameters defining their locomotor dynamics (e.g. duty  
42 factor) (Schmidt-Nielsen, 1984; Alexander, 2002; Biewener, 2003). Thus, several hypotheses have been  
43 proposed to predict how these musculoskeletal elements and locomotor parameters would be affected by  
44 variations in body size (i.e., scaling). The most widespread of these similarity hypotheses are the geometric  
45 similarity hypothesis (already supported by Hill, 1950) and the elastic similarity hypothesis (proposed by  
46 McMahon, 1973). The former states that all linear measurements of an organism are proportional to its body  
47 mass<sup>0.33</sup>, while according to the latter, lengths scale to body mass<sup>0.25</sup> and diameters to body mass<sup>0.375</sup>.

48 In the case of skeletal measurements, early studies suggested that geometric similarity (GS) explained their  
49 scaling in mammals (e.g. Alexander et al., 1979), while elastic similarity (ES) was only found in Bovidae  
50 (McMahon, 1975a; Alexander, 1977). However, as the number of studies in this subject increased, empirical  
51 evidence showed that conformity to either hypotheses was low in mammals (Bou et al., 1987; Bertram &  
52 Biewener, 1990; Christiansen, 1999a,b; Carrano, 2001; Llorens et al., 2001; Lilje et al., 2003; Casinos et al.,  
53 2012). Furthermore, in some cases it has been found that the same skeletal measurement scaled  
54 geometrically in small species and elastically in large species (Economos, 1983; Bertram & Biewener, 1990;  
55 Silva, 1998; Christiansen, 1999a,b; Carrano, 2001). This differential scaling (or complex allometry) suggests  
56 that general allometric calculations would thus not be applicable to a large range of variations in body size.

57 Despite the large number of studies on the scaling of the mammalian appendicular skeleton, little to no  
58 consideration has been given to the scaling of skeletal measurements other than the length and diameters of  
59 the humerus, radius/ulna, femur and tibia. In fact, only the study of Lilje et al. (2003) on Ruminantia and that  
60 of Schmidt & Fischer (2009) on Mammalia have paid any attention to the scaling of the scapula, which has  
61 been shown to be the main propulsive element of the forelimb (Lilje & Fischer, 2001; Fischer et al., 2002).

62 Furthermore, although several studies have dealt with the scaling of particular orders within Mammalia, their  
63 sample sizes are usually too small to perform interfamilial comparisons. Finally, no work so far has studied  
64 how locomotor specializations affect the scaling pattern of the appendicular skeleton in a comparative  
65 framework. It has been suggested that similarity hypotheses imply adaptive neutrality, or at least  
66 independence of the locomotor type of the species that are compared (Bou et al., 1987). Therefore, samples  
67 including extreme locomotor patterns should deviate markedly from the predictions of similarity hypotheses.

68 The order Carnivora is one of the few groups of mammals that allows an allometric study of the appendicular  
69 skeleton in such a multifaceted approach, since: 1) carnivorans span a size range of four orders of magnitude  
70 (from less than 0.1 kg in the least weasel (*Mustela nivalis*) to well over two tonnes in elephant seals  
71 (*Mirounga sp.*)), which enables not only classic allometric studies but also to test for differential scaling; 2)  
72 they constitute a monophyletic group with several well-represented families, granting interfamilial scaling  
73 comparisons; and 3) they present one of the widest locomotor diversities among mammals, which allows to  
74 study the effect of locomotor specializations in the scaling of the limb bones (Van Valkenburgh, 1987;  
75 Bertram & Biewener, 1990; Wilson & Mittermeier, 2009; Nyakatura & Bininda-Emonds, 2012).

76 Thus, the first aim of this study was to determine the scaling pattern of the carnivoran appendicular skeleton,  
77 with emphasis on the scapula and several morphofunctional dimensions of the appendicular skeleton, and to  
78 assess whether differential scaling could be found in this pattern. Previous studies on the scaling of the  
79 appendicular skeleton in Carnivora have shown low conformity to either similarity hypothesis when long  
80 bone lengths are regressed against diameters (Bertram & Biewener, 1990). However, when regressed against  
81 body mass, bone lengths tend to scale geometrically and least circumference elastically (Christiansen,  
82 1999a). More recently, two studies on the scaling of relative segment lengths in Mammalia have also  
83 presented separate results for the carnivoran species in their sample. However, while first Schmidt (2008)  
84 suggested that limb proportions are size-independent in Carnivora, significant size-related variation in those  
85 variables was later found by the same author (Schmidt & Fischer, 2009). Finally, regarding differential  
86 scaling, Bertram & Biewener (1990) found evidence for complex allometry in the length and diameters of  
87 the carnivoran humerus, radius, femur and tibia.

88 Once this scaling pattern for the whole order was determined, the second aim of this study was to analyze  
89 whether the main phyletic lines (families) within Carnivora deviated from it, and if so, then how. Few  
90 scaling studies have been carried out on the appendicular skeleton of any particular family within Carnivora.  
91 When regressing long bone lengths and diameters to femur length in Canidae, Wayne (1986) found  
92 significant deviations from isometric scaling, which suggested low conformity with either GS or ES in the  
93 appendicular skeleton of canids. However, in a study with over sixty dog breeds, Casinos et al. (1986) found  
94 that the scaling of humerus, radius and tibia conformed to GS but not that of the femur, which could explain  
95 the lack of conformity in Wayne's study. Heinrich & Biknevicus (1998) showed that, in Martinae  
96 (Mustelidae), long bone dimensions tended to scale elastically, but conformity was also low. Recent studies  
97 suggest geometric scaling with no differential scaling in Felidae (Day & Jayne, 2007; Gálvez-López &  
98 Casinos, 2012). Finally, evidence for scaling differences between Felidae and Canidae was presented by  
99 Meachen-Samuels & Van Valkenburgh (2009).

100 The last objective of the present study was to test whether particular locomotor habits within Carnivora cause  
101 deviations from the general scaling pattern for the order. To our knowledge, only the study of Bou et al.  
102 (1987) has pursued a similar approach, but then in rodents and other small mammals. In the case of  
103 Carnivora, this lack of studies could be related to the general belief that their appendicular skeleton is highly  
104 conservative in terms of bone morphology and locomotor style (Flynn et al., 1988; Bertram & Biewener,  
105 1990; Day & Jayne, 2007; but see Heinrich & Biknevicus, 1998; Gálvez-López, 2021).

## 107 **Material and Methods**

108  
109 The sample consisted of 429 specimens from 137 species of Carnivora (Table 1), representing about 48% of  
110 extant species (Wozencraft, 2005). For each specimen, measurements were taken on the scapula, humerus,  
111 radius, ulna, and third metacarpal. The variables analyzed in this study have already been described in the  
112 Supplementary Information of Gálvez-López (2021) but are repeated here in Table 2 for simplicity. The 30  
113 studied variables included 19 linear measurements, one projected distance ( $T$ ), 8 ratios, and 2 angles ( $\theta$ ,  $\alpha$ ),

114 and are summarized in Figure 1. Finally, Table 3 describes the locomotor categories used in this study,  
 115 which represent the locomotor specialization of each species (i.e., the main locomotor habit of each species).  
 116

117 **Table 1. Species measured.** For each species, the table shows the number of measured specimens (n), the  
 118 assigned category for locomotor type (loctyp), and the references from which the mean body mass value for  
 119 that species was taken (M<sub>b</sub>). See Table 2 for a description of locomotor type categories. Abbreviations:  
 120 semiaq, semiaquatic; semiarb, semiarboreal; semifoss, semifossorial.

| species                        | n | loctyp      | M <sub>b</sub>        | species                           | n  | loctyp             | M <sub>b</sub> | species                       | n  | loctyp      | M <sub>b</sub> |
|--------------------------------|---|-------------|-----------------------|-----------------------------------|----|--------------------|----------------|-------------------------------|----|-------------|----------------|
| <b>Canidae</b>                 |   |             |                       |                                   |    |                    |                |                               |    |             |                |
| <i>Canis aureus</i>            | 6 | terrestrial | 1                     | <i>Lupulella adusta</i>           | 4  | terrestrial        | 1              | <i>Speothos venaticus</i>     | 6  | terrestrial | 1              |
| <i>Canis latrans</i>           | 3 | terrestrial | 1                     | <i>Lupulella mesomelas</i>        | 7  | terrestrial        | 1              | <i>Vulpes chama</i>           | 1  | terrestrial | 1              |
| <i>Canis lupus</i>             | 5 | terrestrial | 2, 3                  | <i>Lycalopex culpaeus</i>         | 3  | terrestrial        | 1              | <i>Vulpes lagopus</i>         | 3  | terrestrial | 1              |
| <i>Cerdocoyon thous</i>        | 2 | terrestrial | 1                     | <i>Lycalopex gymnocercus</i>      | 4  | terrestrial        | 1              | <i>Vulpes vulpes</i>          | 12 | terrestrial | 5              |
| <i>Chrysocoyon brachyurus</i>  | 6 | terrestrial | 2, 3                  | <i>Lycaon pictus</i>              | 3  | terrestrial        | 1              | <i>Vulpes zerda</i>           | 2  | terrestrial | 1              |
| <i>Cuon alpinus</i>            | 3 | terrestrial | 1                     | <i>Nyctereutes procyonoides</i>   | 3  | terrestrial        | 1              |                               |    |             |                |
| <b>Mustelidae</b>              |   |             |                       |                                   |    |                    |                |                               |    |             |                |
| <i>Amblonyx cinereus</i>       | 2 | semiaq      | 1                     | <i>Lontra provocax</i>            | 1  | semiaq             | 6              | <i>Melogale orientalis</i>    | 1  | terrestrial | 1              |
| <i>Arctonyx collaris</i>       | 1 | semifoss    | 1                     | <i>Lutra lutra</i>                | 5  | semiaq             | 7              | <i>Mustela erminea</i>        | 8  | terrestrial | 8              |
| <i>Eira barbara</i>            | 2 | semiarb     | 1                     | <i>Lutrogale perspicillata</i>    | 1  | semiaq             | 1              | <i>Mustela eversmannii</i>    | 1  | terrestrial | 1              |
| <i>Enhydra lutris</i>          | 1 | aquatic     | 1                     | <i>Lyncodon patagonicus</i>       | 2  | terrestrial        | 1              | <i>Mustela lutreola</i>       | 1  | semiaq      | 1              |
| <i>Galictis cuja</i>           | 2 | terrestrial | 1                     | <i>Martes americana</i>           | 1  | semiarb            | 1              | <i>Mustela nivalis</i>        | 5  | terrestrial | 8              |
| <i>Galictis vittata</i>        | 2 | terrestrial | 1                     | <i>Martes foina</i>               | 23 | scansorial         | 8              | <i>Mustela nudipes</i>        | 2  | terrestrial | 1              |
| <i>Gulo gulo</i>               | 2 | scansorial  | 1                     | <i>Martes martes</i>              | 8  | semiarb            | 8              | <i>Mustela putorius</i>       | 6  | terrestrial | 1              |
| <i>Ictonyx lybicus</i>         | 2 | terrestrial | 1                     | <i>Martes zibellina</i>           | 1  | scansorial         | 1              | <i>Neovison vison</i>         | 2  | semiaq      | 1              |
| <i>Ictonyx striatus</i>        | 1 | terrestrial | 1                     | <i>Meles meles</i>                | 5  | semifoss           | 9              | <i>Pteronura brasiliensis</i> | 2  | semiaq      | 1              |
| <i>Lontra felina</i>           | 3 | semiaq      | 1                     | <i>Mellivora capensis</i>         | 2  | semifoss           | 1              | <i>Vormela peregusna</i>      | 3  | semifoss    | 1              |
| <i>Lontra longicaudis</i>      | 2 | semiaq      | 1                     | <i>Melogale moschata</i>          | 1  | terrestrial        | 1              |                               |    |             |                |
| <b>Mephitidae</b>              |   |             |                       |                                   |    |                    |                |                               |    |             |                |
| <i>Conepatus chinga</i>        | 2 | semifoss    | 1                     | <i>Conepatus humboldti</i>        | 1  | semifoss           | 1              | <i>Spilogale gracilis</i>     | 2  | terrestrial | 1              |
| <b>Otariidae</b>               |   |             |                       |                                   |    |                    |                |                               |    |             |                |
| <i>Arctocephalus australis</i> | 1 | aquatic     | 10                    | <i>Otaria flavescens</i>          | 2  | aquatic            | 11             | <i>Zalophus californianus</i> | 2  | aquatic     | 11             |
| <i>Arctocephalus gazella</i>   | 1 | aquatic     | 10                    |                                   |    |                    |                |                               |    |             |                |
| <b>Phocidae</b>                |   |             |                       |                                   |    |                    |                |                               |    |             |                |
| <i>Hydrurga leptonyx</i>       | 1 | aquatic     | 11                    | <i>Mirounga leonina</i>           | 1  | aquatic            | 12             | <i>Phoca vitulina</i>         | 2  | aquatic     | 12             |
| <b>Procyonidae</b>             |   |             |                       |                                   |    |                    |                |                               |    |             |                |
| <i>Bassaricyon gabbii</i>      | 1 | arboreal    | 1                     | <i>Nasua nasua</i>                | 6  | scansorial         | 15             | <i>Procyon cancrivorus</i>    | 3  | scansorial  | 1              |
| <i>Bassariscus astutus</i>     | 1 | scansorial  | 1                     | <i>Potos flavus</i>               | 4  | arboreal           | 1              | <i>Procyon lotor</i>          | 5  | scansorial  | 1              |
| <i>Nasua narica</i>            | 4 | scansorial  | 14                    |                                   |    |                    |                |                               |    |             |                |
| <b>Ursidae</b>                 |   |             |                       |                                   |    |                    |                |                               |    |             |                |
| <i>Ailuropoda melanoleuca</i>  | 2 | scansorial  | 1                     | <i>Tremarctos ornatus</i>         | 2  | scansorial         | 1              | <i>Ursus arctos</i>           | 6  | scansorial  | 1              |
| <i>Helarctos malayanus</i>     | 1 | scansorial  | 1                     | <i>Ursus americanus</i>           | 2  | scansorial         | 1              | <i>Ursus maritimus</i>        | 4  | terrestrial | 1              |
| <i>Melursus ursinus</i>        | 1 | scansorial  | 1                     |                                   |    |                    |                |                               |    |             |                |
| <b>Ailuridae</b>               |   |             | <b>Prionodontidae</b> |                                   |    | <b>Nandiniidae</b> |                |                               |    |             |                |
| <i>Ailurus fulgens</i>         | 7 | scansorial  | 13                    | <i>Prionodon linsang</i>          | 1  | arboreal           | 1              | <i>Nandinia binotata</i>      | 5  | semiarb     | 1              |
| <b>Viverridae</b>              |   |             |                       |                                   |    |                    |                |                               |    |             |                |
| <i>Arctictis binturong</i>     | 4 | arboreal    | 1                     | <i>Genetta genetta</i>            | 7  | scansorial         | 1              | <i>Poiana richardsoni</i>     | 1  | semiarb     | 1              |
| <i>Arctogalidia trivirgata</i> | 2 | arboreal    | 1                     | <i>Genetta maculata</i>           | 3  | semiarb            | 1              | <i>Viverra tangalunga</i>     | 4  | terrestrial | 1              |
| <i>Civettictis civetta</i>     | 4 | terrestrial | 20                    | <i>Genetta tigrina</i>            | 1  | semiarb            | 1              | <i>Viverra zibetha</i>        | 2  | terrestrial | 1              |
| <i>Cynogale benettii</i>       | 1 | semiaq      | 1                     | <i>Hemigalus derbyanus</i>        | 4  | semiarb            | 1              | <i>Viverricula indica</i>     | 4  | scansorial  | 1              |
| <i>Genetta felina</i>          | 5 | scansorial  | 1                     | <i>Paradoxurus hermaphroditus</i> | 2  | arboreal           | 1              |                               |    |             |                |
| <b>Herpestidae</b>             |   |             |                       |                                   |    |                    |                |                               |    |             |                |
| <i>Atilax paludinosus</i>      | 2 | semiaq      | 1                     | <i>Galerella sanguinea</i>        | 1  | terrestrial        | 1              | <i>Suricata suricatta</i>     | 4  | semifoss    | 1              |
| <i>Crossarchus obscurus</i>    | 2 | terrestrial | 8                     | <i>Helogale parvula</i>           | 2  | terrestrial        | 1              | <i>Urva brachyura</i>         | 1  | terrestrial | 1              |
| <i>Cynictis penicillata</i>    | 4 | terrestrial | 1                     | <i>Herpestes ichneumon</i>        | 4  | terrestrial        | 1              | <i>Urva edwardsii</i>         | 2  | terrestrial | 1              |
| <i>Galerella pulverulenta</i>  | 4 | terrestrial | 1                     | <i>Ichneumia albicauda</i>        | 2  | terrestrial        | 1              | <i>Urva javanica</i>          | 1  | terrestrial | 1              |

## Eupleridae

|                           |   |             |   |                                 |   |            |   |                          |   |            |   |
|---------------------------|---|-------------|---|---------------------------------|---|------------|---|--------------------------|---|------------|---|
| <i>Cryptoprocta ferox</i> | 2 | semiarb     | 1 | <i>Galidia elegans</i>          | 4 | scansorial | 1 | <i>Salanoia concolor</i> | 2 | scansorial | 1 |
| <i>Fossa fossa</i>        | 2 | terrestrial | 1 | <i>Mungotictis decemlineata</i> | 1 | scansorial | 1 |                          |   |            |   |

## Hyaenidae

|                        |   |             |   |                           |   |             |   |                           |   |             |   |
|------------------------|---|-------------|---|---------------------------|---|-------------|---|---------------------------|---|-------------|---|
| <i>Crocuta crocuta</i> | 2 | terrestrial | 8 | <i>Parahyaena brunnea</i> | 1 | terrestrial | 1 | <i>Proteles cristatus</i> | 2 | terrestrial | 8 |
| <i>Hyaena hyaena</i>   | 3 | terrestrial | 1 |                           |   |             |   |                           |   |             |   |

## Felidae

|                                |    |            |    |                           |   |            |    |                                 |   |            |    |
|--------------------------------|----|------------|----|---------------------------|---|------------|----|---------------------------------|---|------------|----|
| <i>Acinonyx jubatus</i>        | 3  | scansorial | 1  | <i>Leopardus pardalis</i> | 2 | scansorial | 1  | <i>Panthera onca</i>            | 2 | scansorial | 1  |
| <i>Caracal aurata</i>          | 1  | scansorial | 1  | <i>Leopardus tigrinus</i> | 2 | scansorial | 1  | <i>Panthera pardus</i>          | 8 | scansorial | 13 |
| <i>Caracal caracal</i>         | 5  | scansorial | 1  | <i>Leptailurus serval</i> | 6 | scansorial | 12 | <i>Panthera tigris</i>          | 9 | scansorial | 18 |
| <i>Felis chaus</i>             | 1  | scansorial | 1  | <i>Lynx lynx</i>          | 3 | scansorial | 1  | <i>Panthera uncia</i>           | 4 | scansorial | 19 |
| <i>Felis nigripes</i>          | 2  | scansorial | 16 | <i>Lynx pardinus</i>      | 4 | scansorial | 12 | <i>Pardofelis marmorata</i>     | 1 | arboreal   | 1  |
| <i>Felis silvestris</i>        | 15 | scansorial | 1  | <i>Lynx rufus</i>         | 1 | scansorial | 1  | <i>Prionailurus bengalensis</i> | 1 | scansorial | 1  |
| <i>Herpailurus yaguaroundi</i> | 3  | scansorial | 1  | <i>Neofelis nebulosa</i>  | 1 | semiarb    | 17 | <i>Prionailurus planiceps</i>   | 1 | scansorial | 1  |
| <i>Leopardus colocolo</i>      | 2  | scansorial | 1  | <i>Otocolobus manul</i>   | 2 | scansorial | 1  | <i>Puma concolor</i>            | 5 | scansorial | 1  |
| <i>Leopardus geoffroyi</i>     | 2  | scansorial | 1  | <i>Panthera leo</i>       | 7 | scansorial | 1  |                                 |   |            |    |

References: 1. [Wilson & Mittermeier, 2009](#); 2. [Blanco et al., 2002](#); 3. [Mech, 2006](#); 4. [Dietz, 1984](#); 5. [Cavallini, 1995](#); 6. [Reyes-Küppers, 2007](#); 7. [Yom-Tov et al., 2006](#); 8. [Grzimek, 1988](#); 9. [Virgós et al., 2011](#); 10. [Perrin et al., 2002](#); 11. [MacDonald, 2001](#); 12. [Silva & Downing, 1995](#); 13. [Roberts & Gittleman, 1984](#); 14. [Gompper, 1995](#); 15. [Gompper & Decker, 1998](#); 16. [Sliwa, 2004](#); 17. [Sunquist & Sunquist, 2002](#); 18. [Mazák, 1981](#); 19. [IUCN Cat Specialist Group, 2011](#); 20. [Ray, 1995](#).

121

122 **Table 2. Locomotor type categories.** Locomotor type categories were adapted from previous works on the  
 123 relationship between locomotor behavior and forelimb morphology ([Eisenberg, 1981](#); [Van Valkenburgh,](#)  
 124 [1985, 1987](#)).

| Locomotor type | Description                                                                                                                                                     |
|----------------|-----------------------------------------------------------------------------------------------------------------------------------------------------------------|
| arboreal       | species that spend most of their life in trees (over 75%), rarely descending to the ground                                                                      |
| semiarboreal   | species that spend a large amount of their time in the trees (between 50% and 75%), both foraging and resting, but also on the surface of the ground            |
| scansorial     | species that, although mostly terrestrial (over half their time is spent on the ground), can climb well and will readily do so to chase arboreal prey or escape |
| terrestrial    | species that rarely or never climb or swim, and that may dig to modify a burrow but not regularly for food                                                      |
| semifossorial  | species that dig regularly for both food and shelter, but that still show considerable ability to move about on the surface                                     |
| semiaquatic    | species that forage regularly underwater and usually plunge into the water to escape, but must spend time ashore to groom,...                                   |
| aquatic        | species that carry out most of their life cycle in water, although some part of it can be confined to land (parturition, mating, rearing the young)             |

125

126 Regression methods were used to relate each variable to body mass ( $M_b$ ). All regressions were calculated  
 127 with the standardised major axis method (SMA), since regression slopes were the primary interest of this  
 128 study, and ordinary least squares regression methods (OLS) tend to underestimate the slope of the line-of-  
 129 best-fit because its calculation involves fitting the predicted y-values as closely as possible to the observed y-  
 130 values ([Warton et al., 2006](#)). The power equation ( $y = a \cdot x^b$ ; Eq. 1) was assumed for all variables but **T** and

132  $\theta$ , for which the linear model of regression was used  
 133 ( $y = a + b \cdot x$ ; Eq. 2), and 95% confidence intervals  
 134 were calculated for both the coefficient ( $a$ ) and the  
 135 allometric exponent ( $b_{trad}$ ). All regressions were  
 136 calculated using PAST (Hammer et al., 2001). In order  
 137 to compare the present results with those previously  
 138 published using OLS regressions, SMA slopes were  
 139 calculated for those studies prior to the comparison by  
 140 dividing their OLS slopes by the corresponding  
 141 correlation coefficient (Sokal & Rohlf, 1995).

142 Additionally, all the SMA regression slopes were also  
 143 calculated using phylogenetically independent  
 144 contrasts (PIC; Felsenstein, 1985). This methodology  
 145 takes into account the phylogenetic signal inherent to  
 146 interspecific data and thus accounts for the potential  
 147 correlation of the error terms that could arise due to the  
 148 lack of independence among species, since they can be  
 149 arranged in a hierarchical sequence (i.e., a  
 150 phylogenetic tree; Felsenstein, 1985; Grafen, 1989;  
 151 Harvey & Pagel, 1991; Christiansen, 2002a, b). PIC  
 152 regression slopes ( $b_{PIC}$ ) were calculated using the  
 153 PDAP: PDTREE module of Mesquite (Maddison &  
 154 Maddison, 2010; Midford et al., 2010). The structure  
 155 of the phylogenetic tree used in this study is discussed  
 156 and detailed in the Supplementary Information of  
 157 Gálvez-López (2021), but is reproduced here in Figure 2. When necessary, branch lengths were transformed  
 158 in order to obtain a low and non-significant correlation between the standardized value of the PIC contrasts  
 159 and their corresponding standard deviation. This process has proven to be a good solution against possible  
 160 violations of the assumptions implied by PIC methodology (Felsenstein, 1985; Grafen, 1989; Díaz-Uriarte &  
 161 Garland, 1996, 1998).

162 For each variable and methodology (traditional and PIC), separate regressions were calculated for the whole  
 163 sample, for a subsample excluding Pinnipedia (i.e., a “fissiped” subsample, since pinnipeds showed atypical  
 164 values for their body mass in most of the scatter plots), and for several subsamples by family and by  
 165 locomotor type. Regressions were not calculated for any subsample with a sample size lower than 5, which  
 166 was the case for Hyaenidae, Mephitidae, Phocidae, Otariidae, Prionodontidae, and the monotypic families  
 167 (Ailuridae, Nandiniidae), and also for Eupleridae when using PIC regression.

168 Allometric exponents were considered to deviate significantly from the predictions of either similarity  
 169 hypothesis when their 95%CI did not include the corresponding theoretical value. As stated in the

### Table 3. Variable names and abbreviations.

Two subsamples can be defined within the studied variables: linear measurements (dark grey) and ratios and angles (light grey). For each variable, it is also indicated which table in the [Supplementary Materials](#) shows the regression results.

| Name                                                    | Abbr.                   | Table           |
|---------------------------------------------------------|-------------------------|-----------------|
| Body mass                                               | <b>M<sub>b</sub></b>    |                 |
| Scapular length                                         | <b>L<sub>s</sub></b>    | <b>SR1, 31</b>  |
| Maximum width of supraspinous fossa                     | <b>S</b>                | <b>SR2, 32</b>  |
| Maximum width of infraspinous fossa                     | <b>I</b>                | <b>SR3, 33</b>  |
| Maximum scapular width                                  | <b>A</b>                | <b>SR4, 34</b>  |
| Scapular spine height                                   | <b>H<sub>s</sub></b>    | <b>SR5, 35</b>  |
| Humerus functional length                               | <b>L<sub>h</sub></b>    | <b>SR6, 36</b>  |
| Humerus sagittal diameter                               | <b>d<sub>sh</sub></b>   | <b>SR7, 37</b>  |
| Humerus transverse diameter                             | <b>d<sub>th</sub></b>   | <b>SR8, 38</b>  |
| Projected height of greater tubercle                    | <b>T</b>                | <b>SR9</b>      |
| Humerus robusticity                                     | <b>HR</b>               | <b>SR10, 39</b> |
| Radius functional length                                | <b>L<sub>r</sub></b>    | <b>SR11, 40</b> |
| Radius sagittal diameter                                | <b>d<sub>sr</sub></b>   | <b>SR12, 41</b> |
| Radius transverse diameter                              | <b>d<sub>tr</sub></b>   | <b>SR13, 42</b> |
| Styloid process length                                  | <b>P</b>                | <b>SR14, 43</b> |
| Radius robusticity                                      | <b>RR</b>               | <b>SR15, 44</b> |
| Ulna functional length                                  | <b>L<sub>u</sub></b>    | <b>SR16, 45</b> |
| Ulna sagittal diameter                                  | <b>d<sub>su</sub></b>   | <b>SR17, 46</b> |
| Ulna transverse diameter                                | <b>d<sub>tu</sub></b>   | <b>SR18, 47</b> |
| Olecranon process length                                | <b>O</b>                | <b>SR19, 48</b> |
| Olecranon angle                                         | <b>α</b>                | <b>SR20, 49</b> |
| Olecranon abduction angle                               | <b>θ</b>                | <b>SR21, 50</b> |
| Ulna robusticity                                        | <b>UR</b>               | <b>SR22, 51</b> |
| Indicator of Fossorial Ability                          | <b>IFA</b>              | <b>SR23, 52</b> |
| Third metacarpal functional length                      | <b>L<sub>m</sub></b>    | <b>SR24, 53</b> |
| Third metacarpal sagittal diameter                      | <b>d<sub>sm</sub></b>   | <b>SR25, 54</b> |
| Third metacarpal transverse diameter                    | <b>d<sub>tm</sub></b>   | <b>SR26, 55</b> |
| Third metacarpal robusticity                            | <b>MR</b>               | <b>SR27, 56</b> |
| Relative length of the proximal segment of the forelimb | <b>%<sub>prox</sub></b> | <b>SR28, 57</b> |
| Relative length of the middle segment of the forelimb   | <b>%<sub>mid</sub></b>  | <b>SR29, 58</b> |
| Relative length of the distal segment of the forelimb   | <b>%<sub>dist</sub></b> | <b>SR30, 59</b> |

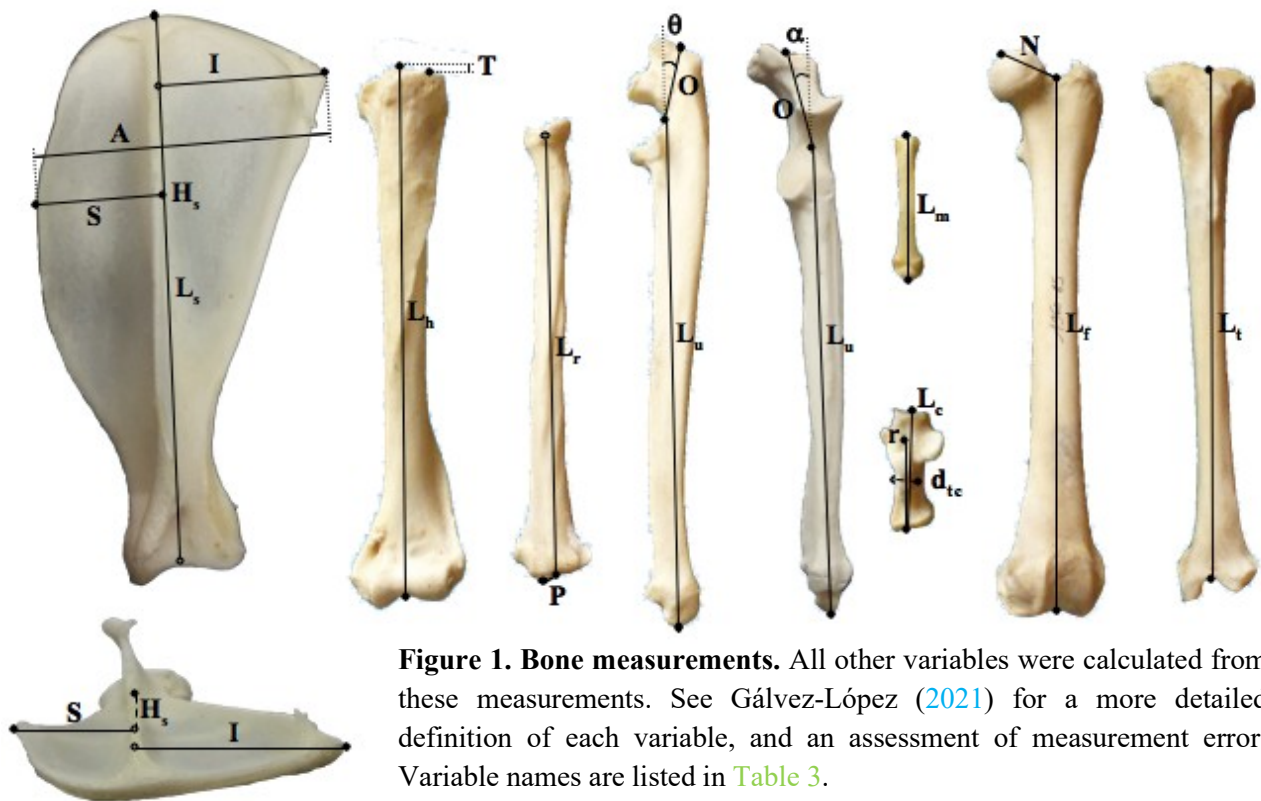

**Figure 1. Bone measurements.** All other variables were calculated from these measurements. See Gálvez-López (2021) for a more detailed definition of each variable, and an assessment of measurement error. Variable names are listed in Table 3.

170 introduction, according to GS, all linear dimensions should be proportional to  $M_b^{0.33}$ . Thus, all ratios,  
 171 including relative lengths and bone robusticities, should present an allometric exponent not different from 0.  
 172 On the other hand, ES proposes that lengths are proportional to  $M_b^{0.25}$  and diameters to  $M_b^{0.375}$ , which  
 173 derives into bone robusticities scaling with a theoretical exponent of 0.125 while ratios other than bone  
 174 robusticities should present an allometric exponent not different from 0. Finally, angles, when measured in  
 175 radians, can be considered lengths, and thus they should scale to  $M_b^{0.33}$  or  $M_b^{0.25}$ , according to GS or ES,  
 176 respectively.

177 For each variable, allometric exponents were then compared between the whole sample and the fissiped  
 178 subsample, and between the different subsamples by family and locomotor type. Furthermore, the PIC slopes  
 179 ( $b_{PIC}$ ) were compared to those obtained by traditional regression analysis ( $b_{trad}$ ) with an F-test ( $p < 0.05$ ) to  
 180 assess whether the phylogenetic signal had any effect on the results.

181 Finally, also for each variable and each subsample, the presence of differential scaling was also evaluated  
 182 using the model proposed by Jolicoeur (1989):

$$183 \quad \ln y = \ln A - C \cdot (\ln x_{max} - \ln x)^D, \text{ (Eq. 3)}$$

184 where  $A$  is a constant (corresponding to  $a$  in Eq. 1),  $C$  is the coefficient of allometry,  $x_{max}$  is the maximum  
 185 observed value of the independent variable (i.e., body mass,  $M_b$ ), and  $D$  is the exponent of complex  
 186 allometry, a time-scale factor. In our case,  $D > 1$  indicated faster relative growth in small carnivorans, and  $D$   
 187  $< 1$  indicated that relative growth increased with size. The complex allometry hypothesis was thus accepted  
 188 when  $D$  was significantly different from 1 ( $p < 0.05$ ). Equation 3 was fitted with SPSS for Windows (release  
 189 15.0.1 2006; SPSS Inc., Chicago, IL, USA), and 95% confidence intervals were calculated for all parameters.

190

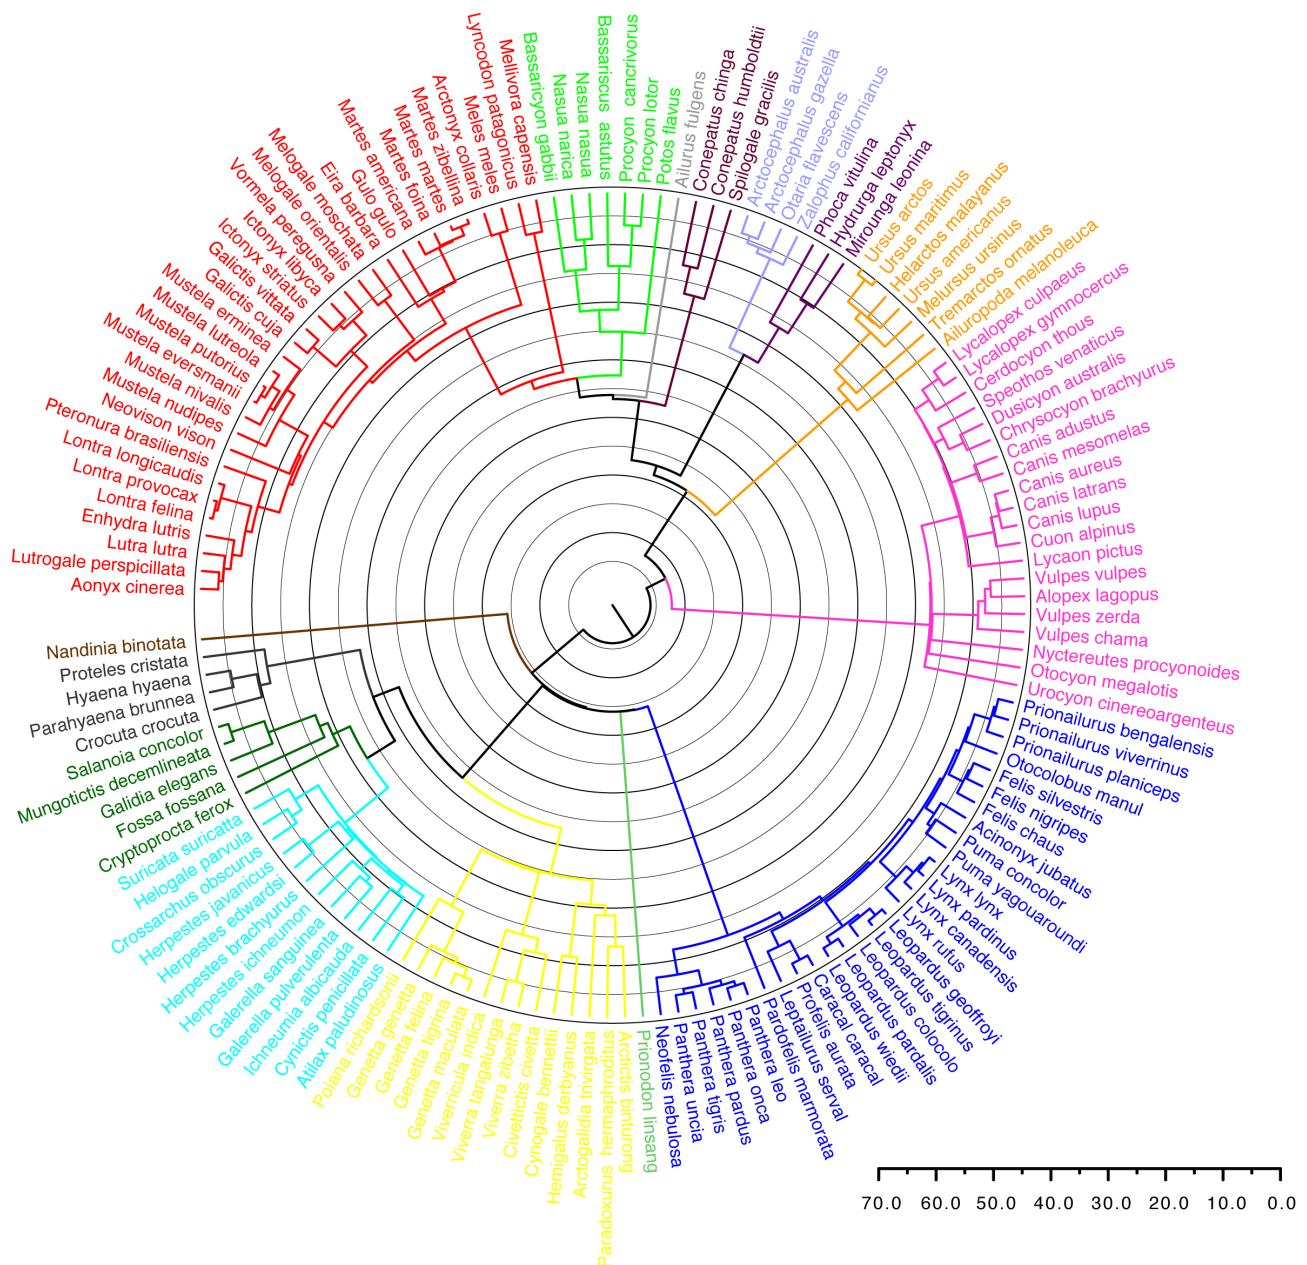

191 **Figure 2. Phylogenetic relationships among the species of Carnivora used in this study.** The timescale  
 192 represents divergence times in millions of years. The phylogeny shown was modified after Nyakatura &  
 193 Bininda-Emonds (2012), as described in Gálvez-López (2021, Supplementary Information).

194

## 195 Results

196

197 **Supplementary Tables SR1 through SR30** show the regression results for each variable. As observed in  
 198 previous studies comparing traditional and PIC regressions (Christiansen, 2002a,b; Gálvez-López &  
 199 Casinos, 2012), the correlation coefficients ( $R$ ) from the PIC analyses were lower than those from traditional  
 200 regressions in most cases, which sometimes resulted in regressions no longer being significant (e.g. Table  
 201 SR30). Some authors have attributed this phenomenon to a higher risk of type I errors (i.e., indicating a  
 202 significant correlation between two variables when there was none) when the effect of phylogeny is  
 203 neglected in correlation analyses (Grafen, 1989; Christiansen, 2002a). In some cases, however,  $R$  actually



204 increased after taking into account the effect of phylogeny, which could result in regressions becoming  
205 significant (e.g. [Table SR28](#)). Branch lengths had to be transformed in most cases before performing the PIC  
206 regressions ([Table S1](#)).

207

### 208 **Whole sample vs. Fissiped subsample**

209 No significant relation with body mass was found for the olecranon abduction angle ( $\theta$ ), or the robusticity of  
210 the ulna (**UR**) or the third metacarpal (**MR**). Neither was significant the regression of radial robusticity (**RR**)  
211 in the whole sample ( $b_{trad}$ ), nor those of **IFA** ( $b_{trad}$ ), **T** ( $b_{PIC}$ ),  $\%_{prox}$  ( $b_{trad}$ ), and  $\%_{dist}$  (both), after removing  
212 Pinnipedia (i.e., in the fissiped subsample).

213 Overall, removal of Pinnipedia from the sample caused a generalized increase of the allometric exponents  
214 when using traditional regression methods, although this increase was only significant for **L<sub>h</sub>**, **L<sub>r</sub>**, **L<sub>u</sub>**, and  
215  $\%_{mid}$ . The exception to this general trend were **S**, **A**, **d<sub>th</sub>**, **HR**, and **d<sub>tr</sub>**, for which a reduction in the allometric  
216 exponent was observed (although it was only significant for **S**; [Table SR2](#)). These differences were not  
217 recovered by the PIC regressions, which produced fairly similar allometric exponents for the whole sample  
218 and the fissiped subsample. In fact, only for **d<sub>tu</sub>** was the allometric exponent of the fissiped subsample  
219 significantly different from that obtained for the whole sample.

220 Contrary to previous studies comparing traditional and PIC regression methods ([Christiansen, 2002b](#);  
221 [Christiansen & Adolfssen, 2005](#); [Gálvez-López & Casinos, 2012](#)), significant differences between the  
222 allometric exponents obtained with each method were observed in the present study. In the case of **S**, **I**, **A**,  
223 and **d<sub>tr</sub>** for both samples, and **L<sub>s</sub>**, **L<sub>h</sub>**, **d<sub>th</sub>**, **L<sub>r</sub>**, and **L<sub>u</sub>** for the fissiped subsample, the allometric exponents  
224 obtained using traditional regression methods were significantly higher than PIC slopes ([Tables SR1–SR4](#),  
225 [SR6](#), [SR8](#), [SR11](#), [SR13](#), [SR16](#)). On the other hand, in **HR** and  $\alpha$  for both samples, **d<sub>tm</sub>** for the whole sample,  
226 and **RR** and **d<sub>tu</sub>** for the fissiped subsample, the PIC slopes were significantly higher than those obtained with  
227 traditional regression methods ([Tables SR10](#), [SR15](#), [SR18](#), [SR21](#), [SR26](#)).

228 Regarding conformity with the similarity hypotheses, [Table 4](#) presents the percentage of linear  
229 measurements that conform to each similarity hypothesis in both the whole sample and the fissiped  
230 subsample, and also using either traditional regression methods or PIC. As indicated by the low percentages,  
231 the scaling pattern of the forelimb in Carnivora conformed poorly to either similarity hypothesis, no matter  
232 whether Pinnipedia was included in the sample. The decrease of most allometric exponents after taking into  
233 account phylogenetic relatedness resulted in about half the variables including 0.33 in their 95%  $CI_b$ ,  
234 improving thus conformity to the geometric similarity (see [Table 4](#), PIC results). Again, results were the  
235 same with or without Pinnipedia.

236 Although **IFA** and the relative segment lengths were supposed to be independent of body mass according to  
237 both similarity hypotheses, this was not the case ([Tables SR23](#), [SR28–SR30](#)). In the case of **T** a significant  
238 but minimal allometric effect was detected ([Tables SR9](#)). The olecranon angle ( $\alpha$ ) scaled with an exponent  
239 not significantly different from 0.33 in most cases ([Tables SR21](#)). Finally, regarding bone robusticities,  
240 regressions were only significant for **HR** and **RR**. Traditional regression provided conflicting results  
241 between the whole sample and the fissiped subsample in each bone robusticity. On the other hand, using PIC

242 regression both bone robusticities in both subsamples scaled with positive allometry to body mass, no matter  
 243 which similarity hypotheses was used (Tables SR10, SR15).

**Table 4. Conformity to the similarity hypotheses summary.** For each subsample, the number of linear measurements conforming to geometric (G) or elastic similarity (E) is given, as is the percentage of the significant regressions for that subsample that they represent. Values in grey indicate that the number of variables conforming to a particular similarity hypothesis is either less than half the number of variables, or over 20% lower than the number of variables conforming to the other similarity hypothesis.

|              |   | traditional   | PIC           |               |   | traditional   | PIC           |
|--------------|---|---------------|---------------|---------------|---|---------------|---------------|
| whole sample | G | 7/19 (36.8%)  | 9/19 (47.4%)  | Viverridae    | G | 16/19 (84.2%) | 17/17 (100%)  |
|              | E | 4/19 (21.1%)  | 5/19 (26.3%)  |               | E | 15/19 (78.9%) | 14/17 (82.4%) |
| fissipeds    | G | 2/19 (10.5%)  | 9/19 (47.4%)  | arboreal      | G | 18/18 (100%)  | 13/17 (76.5%) |
|              | E | 4/19 (21.1%)  | 5/19 (26.3%)  |               | E | 15/18 (83.3%) | 6/17 (35.3%)  |
| Canidae      | G | 11/19 (57.9%) | 10/19 (52.6%) | semiarboreal  | G | 13/19 (68.4%) | 16/19 (84.2%) |
|              | E | 7/19 (36.8%)  | 7/19 (36.8%)  |               | E | 14/19 (73.7%) | 17/19 (89.5%) |
| Mustelidae   | G | 14/19 (73.7%) | 17/19 (89.5%) | scansorial    | G | 9/19 (47.4%)  | 13/19 (68.4%) |
|              | E | 6/19 (31.6%)  | 8/19 (42.1%)  |               | E | 5/19 (26.3%)  | 7/19 (36.8%)  |
| Procyonidae  | G | 18/18 (100%)  | 7/7 (100%)    | terrestrial   | G | 5/19 (26.3%)  | 18/19 (94.7%) |
|              | E | 17/18 (94.4%) | 7/7 (100%)    |               | E | 6/19 (31.6%)  | 7/19 (36.8%)  |
| Ursidae      | G | 8/18 (44.4%)  | 6/8 (75.0%)   | semifossorial | G | 18/18 (100%)  | 18/18 (100%)  |
|              | E | 14/18 (77.8%) | 8/8 (100%)    |               | E | 17/18 (94.4%) | 17/18 (94.4%) |
| Felidae      | G | 9/19 (47.4%)  | 14/19 (73.7%) | semiaquatic   | G | 18/19 (94.7%) | 17/17 (100%)  |
|              | E | 9/19 (47.4%)  | 7/19 (36.8%)  |               | E | 14/19 (73.7%) | 13/17 (76.5%) |
| Herpestidae  | G | 18/19 (94.7%) | 18/19 (94.7%) | aquatic       | G | 12/17 (70.6%) | 6/11 (54.5%)  |
|              | E | 9/19 (47.4%)  | 11/19 (57.9%) |               | E | 11/17 (64.7%) | 7/11 (63.6%)  |
| Eupleridae   | G | 18/19 (94.7%) | –             | freshwater    | G | 18/19 (94.7%) | 18/19 (94.7%) |
|              | E | 16/19 (84.2%) | –             |               | E | 14/19 (73.7%) | 14/19 (73.7%) |

244

#### 245 Family subsamples

246 No significant differences were found between the allometric exponents obtained with each method (Tables  
 247 SR1–SR30), which agrees with previous studies comparing traditional and PIC regression methods  
 248 (Christiansen, 2002b; Christiansen & Adolfssen, 2005; Gálvez-López & Casinos, 2012).

249 Whereas the scaling pattern of some families conformed clearly better to the geometric similarity hypothesis  
 250 (Mustelidae, Herpestidae) or the elastic similarity hypothesis (Ursidae), for others the 95% CI<sub>b</sub> were wide  
 251 enough to include the theoretic value for both hypotheses in most of the variables and no similarity  
 252 hypothesis could be ruled out (Procyonidae, Eupleridae, Viverridae) (Table 4). In Canidae, conformity to the  
 253 geometric similarity hypothesis was low (under 60%), but clearly better than to elastic similarity (under 40%,  
 254 just diameters conformed to elastic similarity). In the case of Felidae, conformity to either similarity  
 255 hypotheses was low when considering traditional regression results, since many of the narrow 95% CI<sub>b</sub>  
 256 excluded the theoretical values proposed by both hypotheses. Considering the PIC regression results,  
 257 however, the felid scaling pattern clearly conformed to the geometric similarity hypothesis (Table 4).

258 As observed for the whole sample and the fissiped subsample, when significant, IFA scaled positively to  
 259 body mass (except for Eupleridae; Table SR23), and T presented a significant but minimal allometric  
 260 exponent (except for Mustelidae; Table SR9). In the case of relative segment lengths (Tables SR28–SR30),  
 261 regressions were significant only in a few cases, but %<sub>prox</sub> always increased with body mass ( $b > 0$ ), while  
 262 %<sub>mid</sub> always decreased with increasing body mass ( $b < 0$ ). Regarding the angles, regressions for  $\theta$  were only

263 significant for Herpestidae ( $b_{trad}$ ) and Canidae ( $b_{PIC}$ ), in both cases presenting allometric exponents very  
 264 close to zero (Table SR20). On the other hand, the 95% CI<sub>b</sub> for  $\alpha$  included both 0.25 and 0.33 in all  
 265 significant traditional regressions. However, after correcting for phylogeny, only the regression for Felidae  
 266 remained significant (and scaled geometrically; Table SR21). Finally, regressions of bone robusticities on  
 267 body mass were not significant in most cases, but when they were significant, their allometric exponents  
 268 conformed better to the predictions of the hypothesis of elastic similarity, since they were in every case  
 269 different from 0 (Tables SR10, SR15, SR22, SR27).

270 Figure 3 shows comparisons of the allometric exponents between different families for each variable, which  
 271 are summarized in Table 5. No significant differences between families were found for HR,  $\theta$ ,  $\alpha$ , UR, IFA,  
 272 MR, %<sub>prox</sub>, %<sub>mid</sub>, or %<sub>dist</sub>. Overall, Canidae scaled faster than all other families in each case where  
 273 significant differences between allometric exponents were found (especially when considering PIC  
 274 regression results), while the relationships among the rest of the families varied among the variables studied.  
 275

**Table 5. Differences in allometric exponents between families.** Rows list families with an allometric exponent ( $b$ ) significantly lower than the families listed in columns. That can happen when comparing allometric exponents from traditional regression (trad.), phylogenetically independent contrasts (PIC), or when using both methodologies (both). Variable names are listed in Table 3.

|                      | < Canidae                                                                                                                                                                                                                          | < Mustelidae                                                                                                                                       | < Felidae                                                                                                                                                | < Herpestidae                                  | < Eupleridae                                                                         | < Viverridae                                                           |
|----------------------|------------------------------------------------------------------------------------------------------------------------------------------------------------------------------------------------------------------------------------|----------------------------------------------------------------------------------------------------------------------------------------------------|----------------------------------------------------------------------------------------------------------------------------------------------------------|------------------------------------------------|--------------------------------------------------------------------------------------|------------------------------------------------------------------------|
| <b>Canidae</b> <     | –                                                                                                                                                                                                                                  | –                                                                                                                                                  | –                                                                                                                                                        | trad: T                                        | –                                                                                    | PIC: T                                                                 |
| <b>Mustelidae</b> <  | both: L <sub>s</sub> , d <sub>th</sub> , d <sub>tr</sub> , P, d <sub>sm</sub><br>trad.: d <sub>sr</sub><br>PIC: L <sub>h</sub> , T, L <sub>r</sub> , L <sub>u</sub> , L <sub>m</sub>                                               | –                                                                                                                                                  | trad.: d <sub>th</sub> , d <sub>sr</sub> , d <sub>tu</sub><br>PIC: T                                                                                     | –                                              | trad.: d <sub>th</sub>                                                               | PIC: T                                                                 |
| <b>Procyonidae</b> < | both: d <sub>th</sub> , d <sub>sr</sub> , L <sub>m</sub><br>trad.: I, A, L <sub>h</sub> , d <sub>tm</sub><br>PIC: L <sub>r</sub> , L <sub>u</sub>                                                                                  | trad.: I                                                                                                                                           | PIC: d <sub>sr</sub>                                                                                                                                     | –                                              | trad.: L <sub>h</sub> , d <sub>th</sub>                                              | PIC: d <sub>sh</sub>                                                   |
| <b>Ursidae</b> <     | both: L <sub>s</sub> , S, A, d <sub>sh</sub> , d <sub>th</sub> ,<br>L <sub>r</sub> , d <sub>sm</sub> , d <sub>tm</sub><br>trad.: I, H <sub>s</sub> , d <sub>su</sub> , O<br>PIC: L <sub>h</sub> , d <sub>tr</sub> , L <sub>u</sub> | both: S, A, d <sub>sh</sub> , d <sub>th</sub> ,<br>L <sub>u</sub> , d <sub>sm</sub> , d <sub>tm</sub><br>trad.: I, H <sub>s</sub> , L <sub>r</sub> | both: S, A, d <sub>sh</sub> ,<br>d <sub>th</sub> , d <sub>sm</sub> , d <sub>tm</sub><br>trad.: I, H <sub>s</sub><br>PIC: L <sub>r</sub> , L <sub>u</sub> | both: S, A<br>trad.: I<br>PIC: d <sub>sm</sub> | trad.: S, A, L <sub>h</sub> ,<br>d <sub>sh</sub> , d <sub>th</sub> , d <sub>sm</sub> | both: A, d <sub>th</sub> , d <sub>sm</sub><br>trad.: S, H <sub>s</sub> |
| <b>Felidae</b> <     | both: L <sub>s</sub> , S, T, P, d <sub>sm</sub><br>PIC: A, L <sub>h</sub> , d <sub>tr</sub> , L <sub>u</sub> , L <sub>m</sub>                                                                                                      | both: I<br>trad.: S, A, H <sub>s</sub>                                                                                                             | –                                                                                                                                                        | trad: T                                        | trad.: L <sub>h</sub>                                                                | both: T                                                                |
| <b>Herpestidae</b> < | both: L <sub>s</sub> , S, A, H <sub>s</sub> , d <sub>sh</sub> ,<br>d <sub>th</sub> , P, d <sub>sm</sub> , d <sub>tm</sub><br>trad.: d <sub>sr</sub> , O<br>PIC: I, L <sub>h</sub> , d <sub>tr</sub>                                | both: I, A, H <sub>s</sub><br>trad.: S, d <sub>sh</sub><br>PIC: d <sub>tm</sub>                                                                    | both: H <sub>s</sub> , d <sub>sh</sub> , d <sub>th</sub><br>PIC: d <sub>tm</sub>                                                                         | –                                              | trad.: d <sub>sh</sub> , d <sub>th</sub>                                             | both: H <sub>s</sub> , d <sub>th</sub>                                 |
| <b>Eupleridae</b> <  | trad.: d <sub>sr</sub> , L <sub>m</sub>                                                                                                                                                                                            | –                                                                                                                                                  | –                                                                                                                                                        | trad.: L <sub>m</sub>                          | –                                                                                    | –                                                                      |
| <b>Viverridae</b> <  | both: L <sub>s</sub> , A, L <sub>h</sub> , d <sub>sh</sub> , L <sub>r</sub><br>trad.: S, d <sub>sr</sub> , d <sub>tr</sub> , d <sub>sm</sub><br>PIC: I, L <sub>h</sub> , L <sub>u</sub>                                            | both: I, A<br>trad.: H <sub>s</sub>                                                                                                                | trad.: d <sub>sr</sub> , RR, d <sub>tu</sub>                                                                                                             | –                                              | trad.: L <sub>h</sub>                                                                | –                                                                      |

276

### 277 Locomotor type subsamples

278 Contrary to previous studies comparing traditional and PIC regression methods (Christiansen, 2002b;  
 279 Christiansen & Adolfssen, 2005; Gálvez-López & Casinos, 2012), significant differences between the  
 280 allometric exponents obtained with each method were observed for some locomotor type categories. Most of  
 281 these significant differences occurred in terrestrial carnivorans, where PIC slopes were generally lower than  
 282 those obtained using traditional regression methods (L<sub>s</sub>, I, A, L<sub>h</sub>, L<sub>r</sub>, d<sub>tr</sub>, P, L<sub>u</sub>, L<sub>m</sub>; Tables SR1, SR3, SR4,

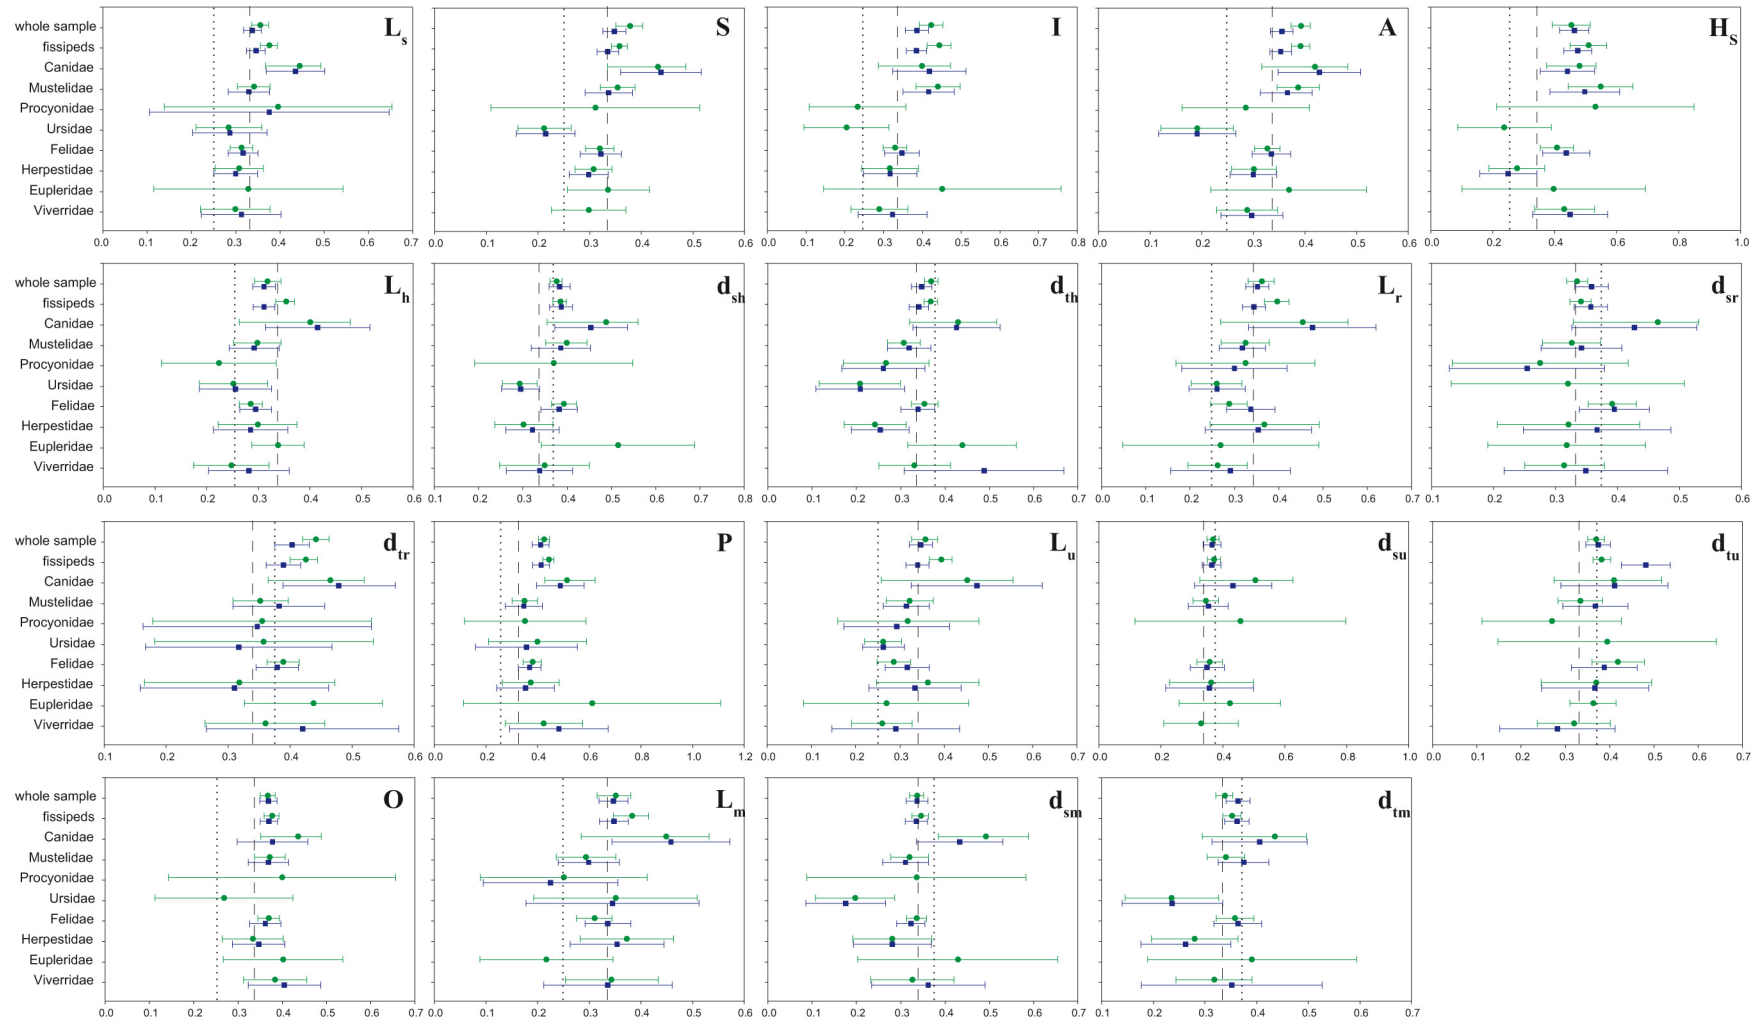

283  
 284  
 285  
 286  
 287  
 288

**Figure 3. Allometric exponents by family.** For each subsample, the allometric exponents obtained using traditional regression methods (green) and phylogenetically independent contrasts (blue), as well as their 95% confidence intervals, are shown. Only the results of significant regressions are presented. The allometric exponents obtained for the whole sample and the fissiped subsample are included as a reference. The dashed line represents the theoretical value proposed by the geometric similarity hypothesis, while the dotted line corresponds to that proposed by the elastic similarity hypothesis. Variable names are listed in [Table 3](#).

289 [SR6](#), [SR11](#), [SR13](#), [SR14](#), [SR16](#), [SR24](#), respectively). However, significantly lower PIC slopes were also  
290 found for scansorial carnivorans ( $d_{th}$ ; [Table SR8](#)). Finally, PIC slopes were significantly higher for %<sub>mid</sub> in  
291 terrestrial carnivorans ([Table SR29](#)).

292 The scaling pattern of scansorial and semiaquatic carnivorans conformed better to the geometric similarity  
293 hypothesis ([Table 4](#)). In the case of semiarboreal, semifossorial, and aquatic carnivorans, however, the 95%  
294  $CI_b$  were wide enough to include the theoretic value for both hypotheses in most of the variables and thus no  
295 similarity hypothesis could be ruled out. In the case of arboreal carnivorans, conformity to both similarity  
296 hypotheses was high when considering traditional regression results. On the other hand, for terrestrial  
297 carnivorans, the scaling pattern obtained using traditional regression methods did not conform to any  
298 similarity hypothesis. Considering the PIC regression results, however, the scaling pattern of both locomotor  
299 types clearly conformed to the geometric similarity hypothesis ([Table 4](#)).

300 Regarding ratios and angles, the results were similar to those obtained for the whole sample, the fissiped  
301 subsamples and the family subsamples. First, when significant, **IFA** scaled positively to body mass (except  
302 for arboreal and terrestrial carnivorans,  $b_{PIC}$  and  $b_{trad}$  respectively; [Table SR23](#)), and **T** presented a significant  
303 but minimal allometric exponent ([Table SR9](#)). And second, in the case of relative segment lengths ([Tables](#)  
304 [SR28–SR30](#)), %<sub>prox</sub> always increased with body mass ( $b > 0$ ), while %<sub>mid</sub> generally decreased with  
305 increasing body mass ( $b < 0$ ; except for arboreal and semiaquatic carnivorans,  $b_{PIC}$  both). On the other hand,  
306 %<sub>dist</sub> either increased (terrestrial, aquatic) or decreased (semiarboreal, semiaquatic) with body mass.  
307 Regarding the angles, again regressions for  $\theta$  were only significant in two cases, in both cases presenting  
308 allometric exponents very close to zero: semifossorial ( $b_{trad}$ ,  $b > 0$ ) and arboreal ( $b_{PIC}$ ,  $b < 0$ ) ([Table SR20](#)).  
309 The scaling of the olecranon angle ( $\alpha$ ) conformed either to elastic similarity (scansorial,  $b_{trad}$ ), to geometric  
310 similarity (scansorial,  $b_{PIC}$ ), or to both (terrestrial,  $b_{trad}$ ) ([Table SR21](#)). Finally, although the allometric  
311 exponents for bone robusticities were positive and conforming to the elastic similarity hypothesis for most  
312 locomotor types ([Tables SR10](#), [SR22](#), [SR27](#)), contrary to the results for the previous subsamples, the  
313 allometric exponents were negative in the radius, ulna, and third metacarpal, of terrestrial carnivorans ( $b_{trad}$   
314 in all cases), indicating that bone robusticity decreased with increasing body mass values ([Tables SR15](#),  
315 [SR22](#), [SR27](#)).

316 [Figure 4](#) shows comparisons of the allometric exponents between different locomotor types for each variable,  
317 which are summarized in [Table 6](#).

318

### 319 **Complex allometry**

320 Results for the test for complex allometry are shown in [Tables SR31](#) through [SR59](#). Since **T** presented  
321 negative values, Equation 3 could not be fit, which made impossible testing for complex allometry with this  
322 method.

323 In the whole sample, evidence for complex allometry was found in almost half of the variables. In the case of  
324 **L<sub>s</sub>**, **I**, **H<sub>s</sub>**, **L<sub>h</sub>**, **L<sub>r</sub>**, **L<sub>u</sub>**, **O**, **L<sub>m</sub>**, and %<sub>dist</sub>,  $D$  was significantly higher than 1, indicating that these variables scale  
325 faster in small species; while in **HR**, **IFA**, %<sub>prox</sub>, and %<sub>mid</sub>,  $D$  was significantly lower than 1, suggesting that  
326 these variables scale faster in large species. However, in all cases where  $D < 1$ , the 95%  $CI_D$  included 0, which

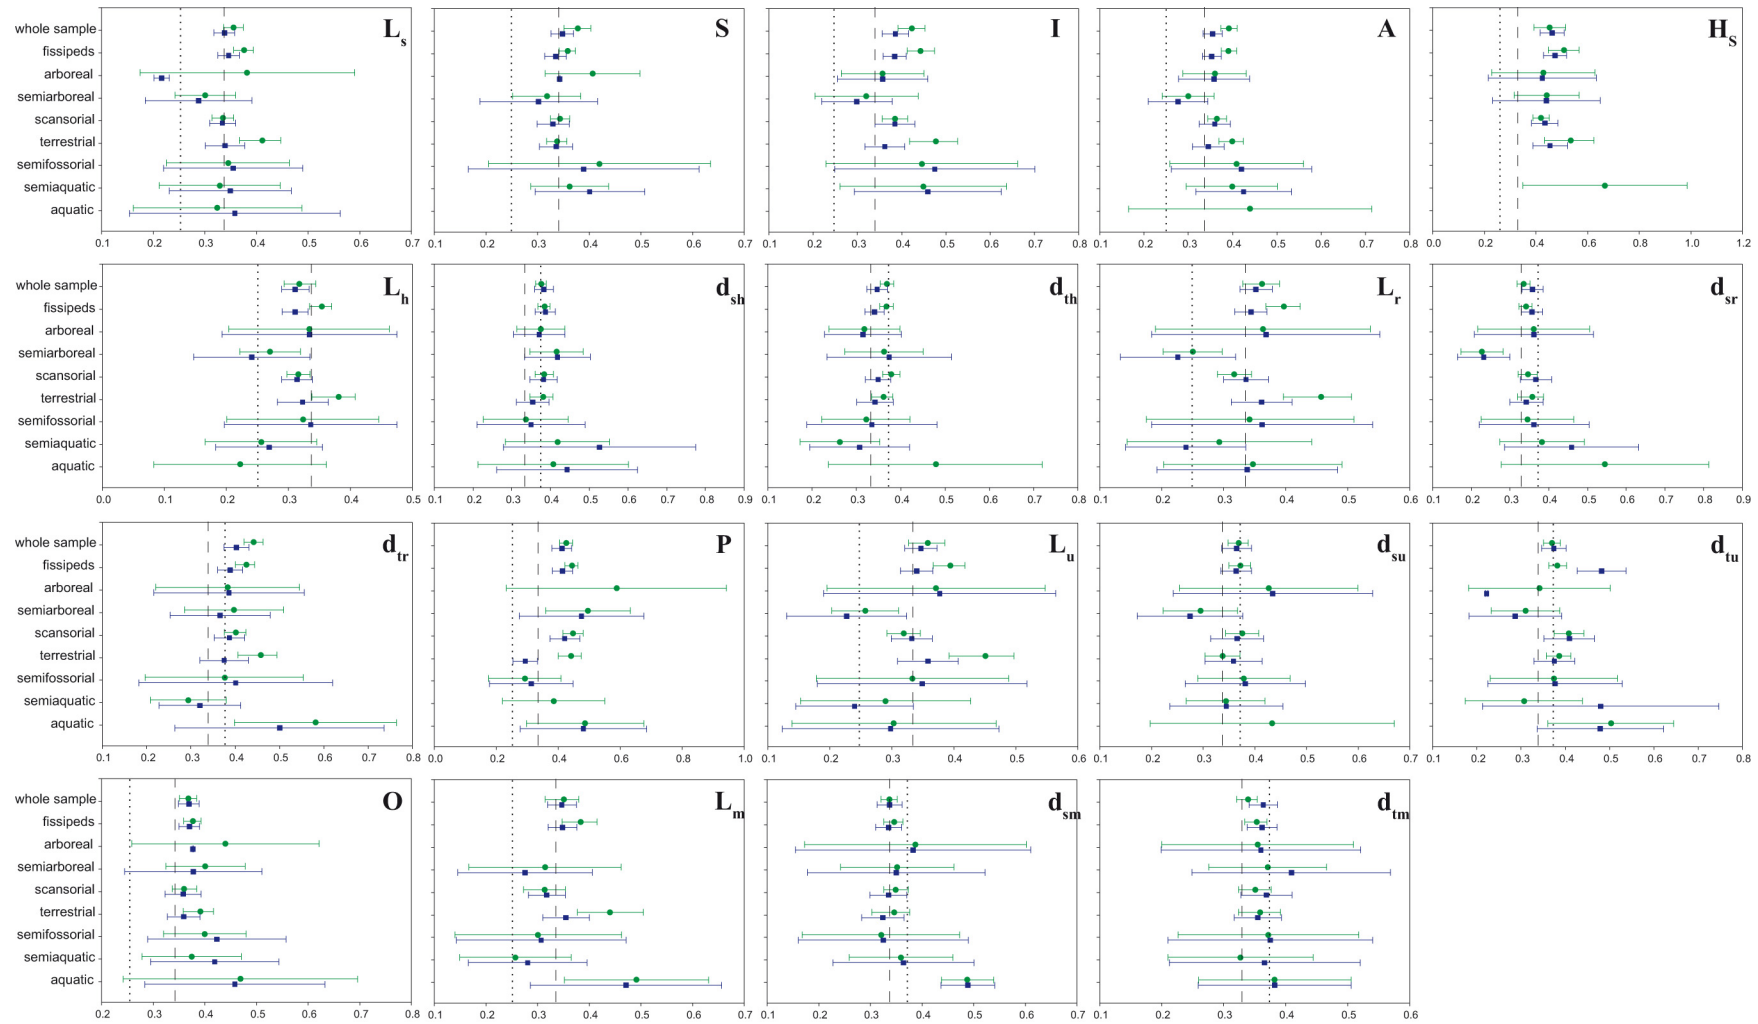

327

328

329

330

331

332

**Figure 4. Allometric exponents by locomotor type.** For each subsample, the allometric exponents obtained using traditional regression methods (green) and phylogenetically independent contrasts (blue), as well as their 95% confidence intervals, are shown. Only the results of significant regressions are presented. The allometric exponents obtained for the whole sample and the fissiped subsample are included as a reference. The dashed line represents the theoretical value proposed by the geometric similarity hypothesis, while the dotted line corresponds to that proposed by the elastic similarity hypothesis. See [Table 2](#) for a description of locomotor type categories. Variable names are listed in [Table 3](#).

**Table 6. Differences in allometric exponents between locomotor types.** Rows list categories with an allometric exponent ( $b$ ) significantly lower than the categories listed in columns. That can happen when comparing allometric exponents from traditional regression (trad.), phylogenetically independent contrasts (PIC), or when using both methodologies (both). Variable names are listed in Table 3.

|                      | < arboreal            | < semiarb             | < scansorial                                                                                                    | < terrestrial                                                                                                                               | < semifoss                            | < semiaq                               | < aquatic                                                                                                                  |
|----------------------|-----------------------|-----------------------|-----------------------------------------------------------------------------------------------------------------|---------------------------------------------------------------------------------------------------------------------------------------------|---------------------------------------|----------------------------------------|----------------------------------------------------------------------------------------------------------------------------|
| <b>arboreal</b> <    | –                     | PIC: IFA              | PIC: L <sub>s</sub> , d <sub>tu</sub>                                                                           | trad: I<br>PIC: L <sub>s</sub> , d <sub>tu</sub> , T                                                                                        | PIC: L <sub>s</sub> , d <sub>tu</sub> | PIC: L <sub>s</sub> , IFA              | both: d <sub>tu</sub><br>trad: d <sub>tr</sub><br>PIC: IFA                                                                 |
| <b>semiarb</b> <     | PIC: A                | –                     | both: A, L <sub>r</sub> , d <sub>sr</sub> , L <sub>u</sub> , d <sub>tu</sub><br>trad: d <sub>su</sub><br>PIC: I | both: A, L <sub>r</sub> , d <sub>sr</sub> , L <sub>u</sub><br>trad: L <sub>s</sub> , I, L <sub>h</sub> , % <sub>dist</sub>                  | –                                     | both: d <sub>sr</sub><br>PIC: A        | both: d <sub>tu</sub> , L <sub>m</sub><br>trad: d <sub>sr</sub> , d <sub>tr</sub> , d <sub>sm</sub> ,<br>% <sub>dist</sub> |
| <b>scansorial</b> <  | PIC: % <sub>mid</sub> | –                     | –                                                                                                               | trad: L <sub>s</sub> , I, A, H <sub>s</sub> , L <sub>h</sub> , L <sub>r</sub> , d <sub>tr</sub> , L <sub>u</sub> , L <sub>m</sub><br>PIC: T | trad: T                               | PIC: % <sub>mid</sub>                  | both: d <sub>sm</sub><br>trad: IFA, L <sub>m</sub>                                                                         |
| <b>terrestrial</b> < | PIC: % <sub>mid</sub> | trad: IFA             | trad: d <sub>su</sub> , UR, IFA, MR<br>PIC: P                                                                   | –                                                                                                                                           | –                                     | trad: IFA, MR<br>PIC: % <sub>mid</sub> | both: d <sub>sm</sub><br>trad: IFA                                                                                         |
| <b>semifoss</b> <    | –                     | trad: P               | trad: P                                                                                                         | trad: P                                                                                                                                     | –                                     | –                                      | both: d <sub>sm</sub><br>trad: d <sub>tr</sub> , P, L <sub>m</sub>                                                         |
| <b>semiaq</b> <      | trad: N<br>PIC: UR    | trad: d <sub>th</sub> | trad: d <sub>th</sub> , d <sub>tr</sub>                                                                         | both: L <sub>r</sub> , L <sub>u</sub><br>trad: L <sub>h</sub> , d <sub>th</sub> , d <sub>tr</sub> , L <sub>m</sub>                          | –                                     | –                                      | both: L <sub>m</sub><br>trad: d <sub>tr</sub> , d <sub>tu</sub> , d <sub>sm</sub>                                          |
| <b>aquatic</b> <     | PIC: % <sub>mid</sub> | –                     | PIC: % <sub>mid</sub>                                                                                           | both: % <sub>mid</sub><br>trad: L <sub>h</sub>                                                                                              | –                                     | –                                      | –                                                                                                                          |

333

334 would result in  $(\ln x_{max} - \ln x)^D = 1$ , and hence  $\ln y = \ln A - C$ , which indicates independence from  
335 the dependent variable  $x$  (here body mass).

336 After removing Pinnipedia from the sample (i.e. in the fissiped subsample), evidence for complex allometry  
337 was not recovered in most cases. Only for H<sub>s</sub>, O, L<sub>m</sub>, and %<sub>dist</sub>, was  $D$  still significantly different from 1 ( $D$   
338  $> 1$  in all cases). Furthermore, significant evidence for complex allometry was also found for d<sub>tu</sub>, which  
339 presented  $D < 1$ .

340 Overall, significant evidence for complex allometry was scarce in the family subsamples. In Procyonidae,  
341 Ursidae and Felidae no variable presented complex allometry, while in Canidae and Eupleridae only one  
342 variable presented complex allometry in each subsample (respectively, P and d<sub>sh</sub>;  $D > 1$  in both cases). On the  
343 other hand, some variables presented significant evidence for complex allometry in Mustelidae (HR, d<sub>tr</sub>,  
344 %<sub>prox</sub>, %<sub>mid</sub>), Herpestidae (L<sub>s</sub>, H<sub>s</sub>, P), and Viverridae (I, L<sub>h</sub>, L<sub>r</sub>, d<sub>sr</sub>, d<sub>tr</sub>, L<sub>u</sub>), with  $D < 1$  in all cases. However,  
345 as observed for the whole sample when  $D < 1$ , in some cases the 95% CI<sub>D</sub> also included 0, indicating  
346 independence from body mass. This was the case for HR, %<sub>prox</sub> and %<sub>mid</sub> in Mustelidae, H<sub>s</sub> and P in  
347 Herpestidae, and L<sub>h</sub> in Viverridae.

348 Finally, in the locomotor type subsamples, significant evidence for complex allometry was even less frequent  
349 than in the family subsamples. Thus, evidence for complex allometry was only found for A, L<sub>h</sub>, d<sub>tr</sub> and L<sub>u</sub> in  
350 semiarboreal carnivorans, for H<sub>s</sub>, L<sub>h</sub>, P, O, L<sub>m</sub> and d<sub>sm</sub> in scansorial carnivorans, and for d<sub>su</sub> in terrestrial  
351 carnivorans. In terrestrial and semiarboreal carnivorans, when complex allometry was detected, it indicated

352 that large carnivorans scaled faster than small species (i.e.  $D < 1$ ), while the opposite was true for scansorial  
353 carnivorans (i.e.  $D > 1$ ). No 95%  $CI_D$  included 0.

354

## 355 **Discussion**

356

### 357 **Considerations on the scaling pattern of the carnivoran forelimb**

358 The present study is currently the largest and most thorough work on skeletal allometry in Carnivora,  
359 regarding both the number of species sampled and the skeletal elements considered. In fact, even when  
360 considering all previous allometric studies on Mammalia, only that of Christiansen (1999a) on long-bone  
361 allometry and that of Silva (1998) on the scaling of body length include a larger amount of species.

362 Regarding the scaling of the appendicular skeleton in Carnivora, similarly to previous studies on the subject  
363 in this and other groups (Bou et al., 1987; Bertram & Biewener, 1990; Christiansen, 1999a,b; Carrano, 2001;  
364 Llorens et al., 2001; Lilje et al., 2003; Casinos et al., 2012), conformity to either the geometric similarity  
365 hypothesis or the elastic similarity hypothesis was low. It could be argued that geometric similarity provided  
366 a better explanation than elastic similarity (Table 4), but that was only because no length scaled elastically.  
367 Also in agreement with previous studies (Economos, 1983; Bertram & Biewener, 1990; Silva, 1998;  
368 Christiansen, 1999a,b; Carrano, 2001), significant evidence for complex allometry was found in several of  
369 the studied variables. Finally, contrary to previous studies comparing traditional regression methods and  
370 phylogenetically independent contrasts (PIC) (Christiansen, 2002b; Christiansen & Adolfssen, 2005; Gálvez-  
371 López & Casinos, 2012), significant differences between the allometric exponents of both methodologies  
372 were found, especially in the fissiped subsample. Thus, in order to avoid any possible artefacts caused by the  
373 phylogenetic relatedness of the species in our sample, only the PIC results will be further discussed.

374 One of the predicted consequences of increasing size is enduring higher peak stresses (especially during  
375 locomotion), which could lead to mechanical failure (Alexander, 2002). Thus, as mammals get larger, they  
376 must either develop more robust bones to resist these higher stresses or change their limb posture to reduce  
377 the magnitude of these stresses (Biewener, 2003; Carrano, 2001). Based on previous results, it has been  
378 proposed that limb posture changes might be the preferred strategy to cope with the size-related increase of  
379 peak stresses, but that at body masses over 200kg more robust bones must be developed, since limbs cannot  
380 be further straightened (Christiansen, 1999a; Carrano, 2001). The change in bone scaling required to develop  
381 more robust bones in large mammals has commonly been considered the cause of differential scaling in bone  
382 dimensions (Biewener, 1990; Christiansen, 1999b). In Carnivora, only a handful of non-aquatic species  
383 attain such large body sizes, suggesting that peak stresses should be reduced in this group by limb  
384 straightening, not by changing limb bone scaling. In the present study, two arguments were found against  
385 this assumption. First, significant evidence for differential scaling was found in several variables, indicating  
386 that the scaling of the forelimb does change with size in Carnivora. However, since the amount of variables  
387 showing complex allometry severely decreased after removing Pinnipedia, most of these scaling changes are  
388 probably related to their specialized biology and ecomorphology and not to reducing peak stresses. Second,  
389 limb bones seemed to scale elastically in Ursidae, which includes most of the largest non-aquatic



390 carnivorans. Since the elastic scaling of limb bones in Bovidae (which includes most of the largest non-  
391 aquatic mammals) was one of the main arguments supporting that large mammals develop more robust bones  
392 to cope with increased peak stresses (Economos, 1983; Christiansen, 1999a), the present results for Ursidae  
393 would point to a similar conclusion. However, the elastic scaling of Ursidae could be an artefact caused by  
394 the combination of their overall lower allometric exponents than other families (i.e., both in lengths and  
395 diameters) and their wide 95%CI<sub>b</sub> (Fig. 3). Furthermore, although the regressions for bone robusticities are  
396 not significant in Ursidae, their allometric exponents are not higher than those of other carnivoran families.  
397 In fact, they were lower than in most other families, especially for the humerus (HR; Table SR10). Thus, the  
398 results of the present study support that, in large non-aquatic carnivorans, mechanical failure is mainly  
399 avoided by limb posture changes instead of by modifying limb bone scaling. Further evidences for this  
400 conclusion are the lack of differential scaling in the “large” families (Canidae, Felidae, Ursidae; Tables  
401 SR31–SR59) and the significant increase with size of the olecranon angle ( $\alpha$ ; Table SR21), especially in the  
402 fissiped subsample. This angle determines the position in which the triceps muscle has the greatest leverage,  
403 being a flexed elbow when  $\alpha$  is small (straight or cranially bent olecranon) or an extended limb when it is  
404 large (caudally bent olecranon) (Van Valkenburgh, 1987). Thus, an allometric increase of  $\alpha$  suggests that  
405 large carnivorans have increasingly straighter forelimbs (but see Day & Jayne, 2007).

406 Several authors have suggested that proximal limb segments are more conservative in lengthening with  
407 increasing body mass than distal ones (McMahon, 1975a; Lilje et al., 2003; Schmidt & Fischer, 2009).  
408 According to this, when regressing bone length to body mass, proximal bones should produce higher  
409 correlation coefficients, and, when comparing allometric exponents, significant differences between  
410 subsamples should be scarce for proximal segments. While this might be the case for Artiodactyla  
411 (McMahon, 1975a; Lilje et al., 2003), the results of the present study suggest that, while it might also apply  
412 for Carnivora as a whole, the more conservative nature of proximal limb segments is not evident in several  
413 carnivoran subsamples. For instance, the highest correlation coefficients correspond to the radius and ulna in  
414 Procyonidae and Ursidae, and to the third metacarpal in aquatic carnivorans. Furthermore, when comparing  
415 the allometric exponents obtained for bone lengths, significant differences were found for all forelimb bones  
416 in all subsample sets (i.e., by family and by locomotor type).

417 Previous studies had reported differences in the scaling of the various forelimb bones (Wayne, 1986;  
418 Bertram & Biewener, 1990; Christiansen, 1999a; Lilje et al., 2003). In those studies, the lengths of the  
419 middle segment (i.e., humerus) tended to scale slower than the rest of the forelimb segments. The scaling of  
420 the proximal element (i.e., scapula) was seldom described, but it presented intermediate values between the  
421 humerus and the distal elements in Canidae (Wayne, 1986) and the fastest scaling in Ruminantia (Lilje et al.,  
422 2003). In the present study the humerus presented the lowest allometric exponent in almost all subsamples,  
423 but no significant differences were found among the other forelimb bones. Only in arboreal, semiarboreal  
424 and semifossorial carnivorans the humerus scaled faster than other segments consistently (scapula,  
425 radius/ulna and third metacarpal, respectively). Together with previous results, this suggests that the slow  
426 scaling of the humerus relative to the other forelimb segments could be a common trend in Mammalia, with  
427 groups with particular locomotor adaptations (such as climbing or digging) deviating from this pattern.

428 Furthermore, the slow scaling of the humerus relative to other forelimb segments would explain the negative  
429 allometry found for its relative length ( $\%_{\text{mid}}$ ) both here and in the study of Schmidt & Fischer (2009).  
430 Regarding bone diameters, few studies have obtained confidence intervals narrow enough to describe  
431 differences in the scaling of different bones: Cubo & Casinos (1998) reported a faster scaling of the  
432 transverse diameter of the radius ( $d_{\text{tr}}$ ) relative to the sagittal diameter of the radius and both humerus  
433 diameters in Mammalia. On the other hand, while comparing the same bones, Heinrich & Biknevičius (1998)  
434 and Llorens et al. (2001) found higher allometric exponents for the sagittal diameter of the humerus ( $d_{\text{sh}}$ )  
435 than for other bone diameters in Martinea and Platyrrhina, respectively. The results of the present study in  
436 Carnivora showed that the sagittal diameter of the third metacarpal ( $d_{\text{sm}}$ ) scaled significantly slower than  
437 most other bone diameters, and the transverse diameters of both radius and ulna ( $d_{\text{tr}}$ ,  $d_{\text{tu}}$ ) and the sagittal  
438 diameter of the humerus ( $d_{\text{sh}}$ ) scaled significantly faster than most other bone diameters. In the case of  $d_{\text{sh}}$ ,  
439 our results suggest that the conflicting results found in previous studies could be related to whether the  
440 deltoid tuberosity was included in its measurement, since it was included within  $d_{\text{sh}}$  in the present study, and  
441 only in Viverridae, whose species do not present a particularly developed deltoid tuberosity, scaled  $d_{\text{sh}}$   
442 significantly slower than  $d_{\text{th}}$  (Tables SR7, SR8). Finally, regarding the fast scaling of  $d_{\text{tr}}$  and  $d_{\text{tu}}$ , it could be  
443 related to a greater development of the muscles originating in the shaft on the radius and ulna (pronators and  
444 supinators of the hand, some wrist flexors and extensors). These increased forearm muscles would provide a  
445 stronger grip to large climbing species (e.g. bears) and also to species relying in the forelimb for prey capture  
446 (e.g. felids), but would also cause larger mediolateral stresses on those bones, hence the need of increased  
447 transverse diameters. In agreement to this, significant evidence for differential scaling was found for  $d_{\text{tr}}$  in  
448 fissipeds and in semiarboreal carnivorans, in both cases with larger species scaling faster than small species.  
449 Aiello (1981) stated that the use of ratios is only correct when both variables comprising it scale  
450 isometrically between them. In agreement with this, due to differences in scaling among bone lengths, the  
451 allometric exponents found for the relative length of the proximal and middle segment ( $\%_{\text{prox}}$ ,  $\%_{\text{mid}}$ ; Tables  
452 SR28, SR29) and the indicator of fossorial ability (IFA; Table SR23) were significantly different from zero,  
453 the value predicted by both similarity hypotheses. Furthermore, the present results on the scaling of relative  
454 segment lengths of the forelimb in Carnivora mirrored those obtained previously for Schmidt & Fischer  
455 (2009) in both Carnivora and Artiodactyla: relative humerus length scales negatively to body mass, while the  
456 relative scapula length does it positively. Finally, it has been proposed that group-specific differences in limb  
457 kinematics are characteristic of large mammals, since small mammals are relatively similar in limb  
458 kinematics regardless of locomotor habit and phylogenetic position (Fischer et al., 2002; Schmidt & Fischer,  
459 2009). Furthermore, small mammals present crouched limbs and large mammals extended limbs, each  
460 requiring different sets of limb-segment proportions for self-stability (Seyfarth et al., 2001). Thus, since  
461 Carnivora includes both small and large species, differential scaling would be expected for their relative  
462 segment lengths, as it has been found in the present study (Tables SR57–SR59).

463  
464  
465

## 466 **Phylogenetic deviations to the scaling of the carnivoran forelimb**

467 Overall, the scaling patterns found in the different carnivoran families for the forelimb were similar to the  
468 pattern found in the whole order. However, several families deviated significantly from it (Fig. 3). In the case  
469 of Canidae, scapula and humerus length ( $L_s$ ,  $L_h$ ), as well as the maximum width of the supraspinous fossa  
470 ( $S$ ), scaled faster than in the rest of Carnivora. Furthermore, when comparing the allometric exponents  
471 obtained for each variable between families, Canidae scaled faster than all other families in each case. This  
472 agrees with the expectations of Wayne (1986), who suggested that size selection is likely one of the most  
473 predominant forces in canid evolution because size differences help mitigate interspecific competition. On  
474 the other hand, several variables scaled significantly slower in Ursidae and in Herpertiae than in the whole  
475 sample (Fig. 3). Finally, it should be noted that the wide confidence intervals (95%CI<sub>b</sub>) obtained for some  
476 families could be obscuring further significant deviations from the ordinal scaling pattern (e.g. Procyonidae,  
477 Eupleridae, Viverridae).

478 The lack of significant differences between the allometric exponents calculated using traditional and PIC  
479 regression methods agrees with a previous study stating that most morphological variability of the  
480 appendicular skeleton in Carnivora occurs at the family level (Gálvez-López, 2021).

481 Regarding conformity to the similarity hypotheses, the present results agree with those of Bertram &  
482 Biewener (1990) in that 1) Ursidae tended to conform better to the elastic similarity hypothesis; 2) mustelids  
483 scaled geometrically; and 3) conformity to either similarity hypotheses was low in Canidae, but slightly  
484 better to geometric similarity. However, contrary to the results of Bertram & Biewener (1990) but in  
485 agreement with those of Day & Jayne (2007) and Gálvez-López & Casinos (2012), felids conformed well to  
486 the geometric similarity hypothesis. The wide 95%CI<sub>b</sub> obtained for Procyonidae in both studies made both  
487 similarity hypotheses equally (un)likely. According to Wayne (1986), bone diameters in Canidae were  
488 expected not to conform to the elastic similarity hypothesis, which was not the case in the present study. The  
489 conflicting results of the present study could be caused by the lower sample size (17 spp here vs. 27 in  
490 Wayne, 1986) or, more probably, by the different independent variables used, since in the present study all  
491 variables were regressed to body mass, and Wayne used femur length.

492 Finally, an interesting pattern was found among the families of Caniformia: for most linear measurements,  
493 the allometric exponents consistently increased from Ursidae to Procyonidae, to Mustelidae, and then to  
494 Canidae (Fig. 3). Neither body mass nor phylogenetic relatedness could explain this pattern, since Canidae  
495 and Ursidae represent both the largest caniforms, and the first phyletic lines to diverge from the caniform  
496 stem, and are placed in opposite extremes of this pattern. A possible explanation to this pattern could be an  
497 increasing degree of adaptation to overground locomotion, or a decrease in arboreal activity. Of all bears  
498 studied, only the polar bear (*Ursus maritimus*) is not an adept climber, since young brown bears (*Ursus*  
499 *arctos*) do climb (Gambaryan, 1974; Wilson & Mittermeier, 2009). Procyonids stand in a similar position,  
500 which could explain why they present lower allometric exponents than bears for some variables. Several  
501 mustelid lineages have diverged from the scansorial lifestyle (e.g. Lutrinae, Mustelinae), and thus Mustelidae  
502 presents intermediate values between ursids/procyonids and Canidae, which are fully adapted to a  
503 completely terrestrial lifestyle (understanding here the word “terrestrial” as defined in Table 2, i.e., with no

504 specific climbing, digging, or swimming capabilities). In agreement with this, the four studied families  
505 within Feliformia, all of which but Herpestidae included species with a varied degree of climbing skills,  
506 presented similar allometric exponents in most variables (Fig. 3). In fact, only the terrestrial Herpestidae  
507 presented, in a few cases, allometric exponents significantly different from the rest of feliform families  
508 (Table 5). Another possible explanation could be a different degree of size selection within each caniform  
509 family. Both the present study and that of Wayne (1986) suggest size selection as a major force in canid  
510 evolution. However, nothing is known on the importance of size selection in the rest of caniform families.

511

### 512 **Locomotor habit and the scaling pattern of the carnivoran forelimb**

513 Lilje et al. (2003) suggested that the scaling of limb bone lengths is more heavily influenced by phylogenetic  
514 relatedness than by habitat preference, at least in Artiodactyla. The present results suggest that this might  
515 also be the case for Carnivora, since the comparison of allometric exponents for bone lengths obtained using  
516 traditional regression methods produced more significant differences than the comparison of PIC slopes for  
517 the same variables among locomotor types.

518 Regarding the particular deviations associated to each locomotor type, in arboreal carnivorans scapular  
519 length ( $L_s$ ) and ulna transverse diameter ( $d_{tu}$ ) increased with body mass with significantly lower exponents  
520 than those obtained for Carnivora as a whole and the fissiped subsample (Fig. 4). However, the narrow  
521 95%CI<sub>b</sub> and high  $R$  for these regressions were unexpected given the low sample size of the arboreal  
522 subsample, suggesting that these results should be regarded cautiously (Tables SR1, SR18). Thus, the  
523 deviations observed for semiarboreal carnivorans probably represent a more accurate description of the  
524 scaling pattern associated to species spending most of their time in the canopy. In this subsample,  
525 significantly lower allometric exponents than those obtained for Carnivora were obtained for the functional  
526 length of the radius and the ulna ( $L_r$ ,  $L_u$ ), the sagittal diameter of the radius ( $d_{sr}$ ), and most scapular widths  
527 ( $A$ ,  $I$ ) (Fig. 4; Table 6). Similar deviations were found for the other functional bone lengths ( $L_s$ ,  $L_h$ ,  $L_m$ ) and  
528 the width of the supraspinous fossa ( $S$ ), although they were not significant (Fig. 4). Furthermore, in all these  
529 cases, the allometric exponents for semiarboreal carnivorans were lower than those for scansorial and  
530 terrestrial species (Fig. 4), often significantly (Table 6). Thus, with increasing size, semiarboreal carnivorans  
531 will present shorter limbs and narrower scapulae than similar-sized scansorial and terrestrial species.  
532 According to Cartmill (1985), the first would be a strategy to increase stability during arboreal locomotion  
533 for claw-climbing mammals, like carnivorans, since relatively shorter limbs enable to maintain their center  
534 of mass close to the support, and thus reduce lateral oscillations of the center of mass. Carnivorans less  
535 adapted to moving in arboreal settings, such as scansorial species, should then resort to postural changes and  
536 other strategies in order to gain in stability when navigating arboreal supports, as demonstrated for the  
537 domestic cat by Gálvez-López et al. (2011). Continuing with adaptations to arboreality, in a study on  
538 forelimb morphology in North American carnivorans, Iwaniuk et al. (1999) found that the degree of  
539 arboreality was positively correlated with long-bone robusticities (calculated as  $L_x/d_{sx}$ ). Thus, they stated  
540 that, with increasing arboreality, forelimb bones became wider, more robust, to better withstand the  
541 multidimensional loads resulting from arboreal locomotion. However, from the definition of their ratios,

542 their results seemed to indicate just the opposite, that is, that arboreal carnivorans presented less robust  
543 forelimb bones (i.e., relatively longer or more slender bones). In the present study, the regressions of bone  
544 robusticities onto body mass tended to produce higher allometric exponents in the subsamples with the most  
545 arboreal species (e.g. **HR**: allometric exponents for semiarboreal carnivorans were higher than for scansorial  
546 and terrestrial carnivorans; **Table SR10**). Since in the present study bone robusticity was the inverse of the  
547 definition of Iwaniuk et al. (1999) (i.e.,  $d_{sx}/L_x$ ), these higher allometric exponents did indeed suggest that  
548 forelimb bones become sturdier (i.e., relatively wider or shorter) with increasing arboreality in Carnivora.  
549 Finally, regarding the pattern of increasing allometric exponents with decreasing arboreality found in  
550 Caniformia, it was not recovered in most cases in the locomotor type subsamples (**Fig. 4**), which could be  
551 explained by feliform species making up around 70% of the arboreal, semiarboreal and scansorial  
552 subsamples.

553 Although all mammals run (i.e., present gaits, either symmetrical or asymmetrical, in which their limbs  
554 spend less than half a cycle on the ground; **Alexander, 2002; Biewener, 2003**), some of them have developed  
555 certain morphological adaptations to increase step length (and thus speed) and to minimize energy costs  
556 while running (e.g. **Gambaryan, 1974; Hildebrand, 1985**). These mammals better adapted to running are  
557 often referred to as “cursorial mammals” (**Smith & Savage, 56; Gambaryan, 1974; Hildebrand, 1985**).  
558 However, as pointed out by Stein & Casinos (1997), the works of Jenkins and other authors (**Jenkins, 1971;**  
559 **Jenkins & Camazine, 1977; Alexander & Jayes, 1983**) introduced ambiguity into the concept of “cursorial”  
560 so it no longer meant “specialized runner”. Thus, the term “cursorial” will not be used in the present work,  
561 and instead “efficient runner” will be used to designate those mammals that have developed morphological  
562 adaptations to run efficiently. It has been described that presenting long limbs is an adaptation to effective  
563 running, since it allows for longer steps and thus higher speeds (**Lull, 1904; Gambaryan, 1974; Hildebrand,**  
564 **1985; Van Valkenburgh, 1987**). However, limb elongation is mainly effected through the distal segments  
565 (**Hildebrand, 1985; Van Valkenburgh, 1987**), and thus, the radius, ulna and metacarpals of running species  
566 should scale faster than the humerus. In the present study, there was not a specific subsample grouping  
567 “efficient runners”, but two subsamples included a fair amount of those species: Canidae, and terrestrial  
568 carnivorans. Thus, bone lengths were expected to scale faster in these subsamples than in other subsamples.  
569 Additionally,  $L_r$ ,  $L_u$  and  $L_m$  were expected to scale faster than  $L_h$ . Both assumptions were supported by the  
570 results of the present study (**Figs. 3–4; Tables 5–6**). Another adaptation to effective running was proposed by  
571 Smith & Savage (1956), who described larger infraspinous fossae than supraspinous fossae in mammals  
572 adapted to running. Thus, it was expected that **I** scaled faster than **S** in Canidae and terrestrial carnivorans.  
573 However, the present results suggest that a faster scaling of the infraspinous fossa is a common trend in  
574 Carnivora, not a particular adaptation to running efficiently. Oddly enough, Canidae was one of the  
575 subsamples deviating from this general trend. Thus, it might be concluded that previously described  
576 adaptations to effective running other than limb elongation are present in the scaling of most carnivoran  
577 subsamples (not just “effective runners”), which suggests that they are more related to the biomechanical  
578 consequences of increasing size than to effective running.

579 The effect of adaptations to digging and swimming to the scaling pattern of the carnivoran forelimb were  
580 hard to ascertain, since 95%CI<sub>b</sub> were usually too wide in semifossorial, semiaquatic and aquatic carnivorans.  
581 In the case of semifossorial carnivorans, they presented high allometric exponents for scapular widths (**S**, **I**,  
582 **A**) and olecranon length (**O**), but they were not significantly different from any other subsample due to high  
583 95%CI<sub>b</sub> (Fig. 4; Table 6). Regarding adaptations to swimming, both semiaquatic and aquatic carnivorans  
584 tended to present high allometric exponents for scapular widths (**S**, **I**, **A**), olecranon length (both absolute, **O**,  
585 and relative, **IFA**), and several bone diameters (**d<sub>sh</sub>**, **d<sub>sr</sub>**, **d<sub>tu</sub>**) and bone robusticies (**HR**, **RR**, **UR**) (Fig. 4;  
586 Table 6). Furthermore, in semiaquatic carnivorans bone lengths scaled slower than in most carnivorans  
587 (significantly in the middle segment: **L<sub>r</sub>**, **L<sub>u</sub>**), while in aquatic carnivorans the third metacarpal scaled faster  
588 than in the rest of Carnivora, in both sagittal diameter and length (Fig. 4; Table 6). Most of these adaptations  
589 had already been suggested by previous anatomical and morphometrical analyses (Osburn, 1903; Smith &  
590 Savage, 1956; English, 1977; Gálvez-López, 2021), and were recovered here as characteristic deviations of  
591 the aquatic/semiaquatic scaling pattern: shorter and more robust limb bones, larger olecrana (both **O** and  
592 **IFA**), and wider scapulas (although not in semiaquatic carnivorans).

593

#### 594 **Differential scaling, phylogeny and locomotor habit**

595 According to Bertram & Biewener (1990), differential scaling might not be evident within the individual  
596 carnivoran families due to their narrow body size ranges. Furthermore, they also stated that differences in  
597 scaling explained by differences in locomotor habit would probably be overridden by phylogenetic  
598 differences in scaling. Those concerns proved irrelevant in the present study, since not only did more  
599 significant cases of complex allometry were found in Viverridae (**M<sub>b</sub>** range: 0.54kg – 13.25kg) than in other  
600 families with wider body mass ranges (Canidae, Felidae, Mustelidae), but also significant cases of complex  
601 allometry were detected in several locomotor type subsamples (again, regardless of body mass range).

602 Previous studies have suggested that differential scaling could be a consequence of mixing species with  
603 different locomotor specializations (Castiella & Casinos, 1990; Gálvez-López & Casinos, 2012). The results  
604 of the present study provide arguments both in favour and against this hypothesis. On one hand, significant  
605 evidence for complex allometry was found in almost half the variables in the whole sample. Furthermore,  
606 several variables presented differential scaling in Mustelidae and Viverridae, both including species with  
607 several locomotor types, and the latter also presenting a narrow body mass range. On the other hand, after  
608 removing the large, swimming, pinniped species, significant evidence for complex allometry was rarely  
609 found. Furthermore, differential scaling was found in some locomotor type categories.

610

#### 611 **On the viability of similarity hypotheses and scaling studies**

612 The present and previous results on the scaling of limb bone morphology have made clear that no similarity  
613 hypothesis alone can explain the scaling patterns existing in mammalian limb bones (Bou et al., 1987;  
614 Bertram & Biewener, 1990; Christiansen, 1999a,b; Carrano, 2001; Llorens et al., 2001; Lilje et al., 2003;  
615 Casinos et al., 2012). In our understanding, the main problem with any similarity hypothesis is their  
616 extremely simplistic approach: each similarity hypothesis chooses one of the many factors determining how

617 limb bone morphology changes with increasing size and defines allometric exponents based on it (geometric  
618 similarity: isometric growth; elastic similarity: deformation under gravity; static stress: constant stresses  
619 while standing still; dynamic stress: constant stresses during locomotion; [McMahon, 1973, 1975b](#); [Alexander  
620 & Jayes, 1983](#); [Alexander, 2002](#)). Thus, since no such single determining factor exists, all similarity  
621 hypotheses are doomed to fail. However, their inability to produce an accurate theoretical allometric  
622 exponent is instead excused by stating that variability around that “universal” trend is clouding the results,  
623 and thus the observed allometric exponents deviate from the predicted ones.

624 A further problem is that large and small mammals have different locomotor requirements ([Lilje & Fischer,  
625 2001](#); [Seyfarth et al., 2001](#); [Fischer et al., 2002](#); [Schmidt & Fischer, 2009](#)). This results in differential scaling  
626 and its oversimplification by establishing a threshold body mass value with which separate those small and  
627 large mammals, and thus be able to ascribe them separately to some similarity hypothesis (or a similarity  
628 hypothesis with different allometric exponents for small and large mammals; [Garcia & da Silva, 2006](#)). But  
629 see also [Kokshenev \(2003, 2007\)](#) for a criticism of Garcia-Silva’s model. The thing with differential scaling  
630 is that it is indeed differential. As observed in any plot representing complex allometry ([Fig. 5](#)), the  
631 allometric exponent changes gradually along a wide spectrum of body masses, and no real threshold exists,  
632 no matter how justifiable it is (e.g. the 20 kg threshold in Carnivora, which is related to prey size changes;  
633 [Carbone et al., 1999](#)).

634 Another source of variability is the adaptation to performing  
635 different modes of locomotion besides walking and running  
636 (climbing, swimming, digging). As stated in the introduction,  
637 [Bou et al. \(1987\)](#) suggested that similarity hypothesis imply  
638 adaptive neutrality, which is not the case, since the present study  
639 has proved that adaptations to different locomotor habits do  
640 indeed result in different scaling patterns. Furthermore,  
641 differences in locomotor habit within the same sample has been  
642 proposed as another possible explanation for differential scaling  
643 ([Castiella & Casinos, 1990](#); [Gálvez-López & Casinos, 2012](#)).

644 Finally, at least in Carnivora, phylogenetic relatedness also plays  
645 an important role in limb bone scaling, as suggested by the  
646 different allometric exponents obtained with traditional and PIC  
647 regression methods in the present study (contrary to previous  
648 studies comparing both methodologies in this and other mammal  
649 groups; [Christiansen, 2002b](#); [Christiansen & Adolfssen, 2005](#);  
650 [Gálvez-López & Casinos, 2012](#)).

651 In conclusion, thus, we propose that either an overcomplicated  
652 model should be constructed including all these factors (and the  
653 ones we are probably missing), or we finally drop the “universal  
654 scaling” searching and focus on solving little problems one at a

**Figure 5. Differential scaling.** Complex allometry plots for olecranon length (A) and ulna transverse diameter (B) in the fissiped subsample. As indicated by the curvature of the plot, olecranon length scales faster in small carnivorans than in large carnivorans (i.e.,  $D > 1$ ), while the opposite is true for ulna transverse diameter (i.e.,  $D < 1$ ).

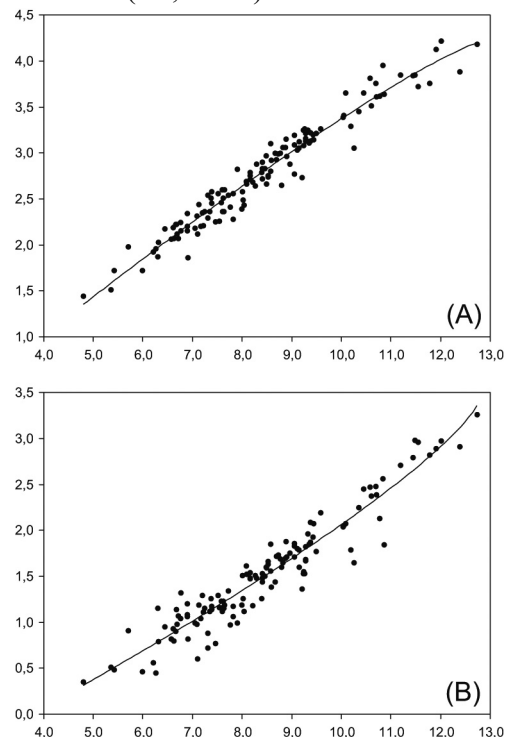

655 time, and from the sum of them formulate a generalization (if possible). For instance, how does limb bone  
656 morphology change with size in arboreal carnivorans? What about in arboreal didelphids and so on? Can we  
657 generalize all those scaling patterns into one scaling pattern for arboreal mammals? We consider that the  
658 present study constitutes a first step in that direction.

659

## 660 **Acknowledgements**

661

662 We would like to thank the curators of the Phylogenetisches Museum (Jena), the Museum für Naturkunde  
663 (Berlin), the Museu de Ciències Naturals de la Ciutadella (Barcelona), the Muséum National d'Histoire  
664 Naturelle (Paris), the Museo Nacional de Ciencias Naturales (Madrid), the Museo Argentino de Ciencias  
665 Naturales (Buenos Aires), the Museo de La Plata (Argentina), and the Naturhistorisches Museum Basel  
666 (Switzerland), for granting me access to the collections. We would also show my appreciation to the  
667 following organisations for partially funding this research: la Caixa; Deutscher Akademischer Austausch  
668 Dienst (DAAD); the University of Barcelona (UB); Agència de Gestió d'Ajuts Universitaris i de Recerca  
669 (AGAUR); Departament d'Innovació, Universitats i Empresa de la Generalitat de Catalunya; and the  
670 European Social Fund (ESF). Finally, this work was completed with the assistance of funds from research  
671 grants CGL2005-04402/BOS and CGL2008-00832/BOS from the former Ministerio de Educación y Ciencia  
672 (MEC) of Spain.

673

## 674 **References**

675

- 676 **Aiello LC** (1981) The allometry of primate body proportions. In: *Vertebrate locomotion*. (ed Day MH), pp.  
677 331–358. London: Academic Press.
- 678 **Alexander RMN** (1977) Allometry of the limbs of antelopes (Bovidae). *J Zool, Lond* **183**, 125–146.
- 679 **Alexander RMN** (2002) *Principles of animal locomotion*. Princeton: Princeton University Press.
- 680 **Alexander RMN, Jayes AS** (1983) A dynamic similarity hypothesis for the gaits of quadrupedal mammals.  
681 *J Zool, Lond* **201**, 135–152.
- 682 **Alexander RMN, Jayes AS, Maloiy GMO, Wathuta EM** (1979) Allometry of the limb bones of mammals  
683 from shrews (*Sorex*) to elephant (*Loxodonta*). *J Zool, Lond* **190**, 155–192.
- 684 **Bertram JEA, Biewener AA** (1990) Differential scaling of the long bones in the terrestrial Carnivora and  
685 other mammals. *J Morphol* **204**, 157–169.
- 686 **Biewener AA** (1990) Biomechanics of mammalian terrestrial locomotion. *Science* **250**, 1097–1103.
- 687 **Biewener AA** (2003) *Animal locomotion*. Oxford: Oxford University Press.
- 688 **Blanco JC, Saénz de Buruaga M, Llana L** (2002) *Canis lupus* Linnaeus, 1758. In: *Atlas de los*  
689 *mamíferos terrestres de España*. (eds Palomo LJ, Gisbert J), pp. 234–237. Madrid: Dirección General  
690 de Conservación de la Naturaleza – SECEM – SECEMU.
- 691 **Bou J, Casinos A, Ocaña J** (1987) Allometry of the limb bones of insectivores and rodents. *J Morphol* **192**,  
692 113–123.



- 693 **Carbone C, Mace GM, Roberts SC, MacDonald DW** (1999) Energetic constraints on the diet of terrestrial  
694 carnivores. *Nature* **402**, 286–288.
- 695 **Carrano MT** (2001) Implications of limb bone scaling, curvature and eccentricity in mammals and non-  
696 avian dinosaurs. *J Zool, Lond* **254**, 41–55.
- 697 **Cartmill M** (1985) Climbing. In: *Functional vertebrate morphology*. (eds Hildebrand M, Bramble DM,  
698 Liem KF, Wake DB), pp. 71–88. Cambridge & London: Belknap Press.
- 699 **Casinos A, Borroto-Páez R, Domene R, Ramos García I** (2012) Scaling and mechanics in the long bones  
700 of West Indian hutias (Rodentia, Capromyidae). In: *Terrestrial mammals of the West Indies:  
701 Contributions*. (eds Borroto-Páez R, Woods CA, Sergile FE), pp. 195–203. Florida: Florida Museum  
702 of Natural History & Wacahoota Press.
- 703 **Casinos A, Bou J, Castiella MJ, Viladiu C** (1986) On the allometry of long bones in dogs (*Canis  
704 familiaris*). *J Morphol* **190**, 73–79.
- 705 **Castiella MJ, Casinos A** (1990) Allometry of leg muscles in insectivores and rodents. *Ann Sci nat, Zool* **11**,  
706 165–178.
- 707 **Cavallini P** (1995) Variation in the body size of the red fox. *Ann Zool Fennici* **32**, 421–427.
- 708 **Christiansen P** (1999a) Scaling of the limb long bones to body mass in terrestrial mammals. *J Morphol* **239**,  
709 167–190.
- 710 **Christiansen P** (1999b) Scaling of mammalian long bones: small and large mammals compared. *J Zool,  
711 Lond* **247**, 333–348.
- 712 **Christiansen P** (2002a) Locomotion in terrestrial mammals: the influence of body mass, limb length and  
713 bone proportions on speed. *Zool J Linn Soc* **136**, 685–714.
- 714 **Christiansen P** (2002b) Mass allometry of the appendicular skeleton in terrestrial mammals. *J Morphol* **251**,  
715 195–209.
- 716 **Christiansen P, Adolfssen JS** (2005) Bite forces, canine strength and skull allometry in carnivores  
717 (Mammalia, Carnivora). *J Zool, Lond* **266**, 133–151.
- 718 **Cubo J, Casinos A** (1998) The variation of the cross-sectional shape in the long bones of birds and  
719 mammals. *Ann Sci nat, Zool* **1**, 51–62.
- 720 **Day LM, Jayne BC** (2007) Interspecific scaling of the morphology and posture of the hind limbs during the  
721 locomotion of cats (Felidae). *J Exp Biol* **210**, 642–654.
- 722 **Díaz-Uriarte R, Garland T Jr** (1996) Testing hypotheses of correlated evolution using phylogenetically  
723 independent contrasts: sensitivity to deviations from Brownian motion. *Syst Biol* **45**, 27–47.
- 724 **Díaz-Uriarte R, Garland T Jr** (1998) Effects of branch length errors on the performance of  
725 phylogenetically independent contrasts. *Syst Biol* **47**, 654–672.
- 726 **Dietz JM** (1984) Ecology and social organization of the maned wolf (*Chrysocyon brachyurus*). *Smithson  
727 Contr Zool* **392**, 1–51.
- 728 **Economos AC** (1983) Elastic and/or geometric similarity in mammalian design? *J Theor Biol* **103**, 167–172.
- 729 **Eisenberg JF** (1981) *The mammalian radiations: a study in evolution and adaptation*. Chicago: University  
730 of Chicago Press.

- 731 **English AWM** (1977) Structural correlates of forelimb function in fur seals and sea lions. *J Morphol* **151**,  
732 325–352.
- 733 **Felsenstein J** (1985) Phylogenies and the comparative method. *Am Nat* **125**, 1–15.
- 734 **Fischer MS, Schilling N, Schmidt M, Haarhaus D, Witte H** (2002) Basic limb kinematics of small therian  
735 mammals. *J Exp Biol* **205**, 1315–1338.
- 736 **Flynn JJ, Neff NA, Tedford RH** (1988) Phylogeny of the Carnivora. In: *Phylogeny and classification of the*  
737 *Tetrapods, vol 2: Mammals*. (ed Benton M), pp. 73–116. Oxford: Clarendon Press.
- 738 **Gálvez-López E** (2021) Quantifying morphological adaptations using direct measurements: The carnivoran  
739 appendicular skeleton as a case study. *Anat Rec* **304**, 480–506.
- 740 **Gálvez-López E, Casinos A** (2012) Scaling and mechanics of the felid calcaneus: geometric similarity  
741 without differential allometric scaling. *J Anat* **220**, 555–563.
- 742 **Gálvez-López E, Maes LD, Abourachid A** (2011) The search for stability on narrow supports: an  
743 experimental study in cats and dogs. *Zoology* **114**, 224–232.
- 744 **Gambaryan PP** (1974) *How mammals run: anatomical adaptations*. New York: John Wiley & Sons.
- 745 **Garcia GJM, da Silva JKL** (2006) Interspecific allometry of bone dimensions: A review of the theoretical  
746 models. *Phys Life Rev* **3**, 188–209.
- 747 **Gompper ME** (1995) *Nasua narica*. *Mamm Species* **487**, 1–10.
- 748 **Gompper ME, Decker DM** (1998) *Nasua nasua*. *Mamm Species* **580**, 1–9.
- 749 **Grafen A** (1989) The phylogenetic regression. *Phil Trans R Soc B* **326**, 119–157.
- 750 **Grzimek B** (ed) (1988) *Grzimeks Enzyklopädie: Säugetiere*. München: Kindler Verlag GmbH.
- 751 **Hammer Ø, Harper DAT, Ryan PD** (2001) PAST: Paleontological statistics software package for  
752 education and data analysis. *Palaeontol Electron* **4**, 9 pp.
- 753 **Harvey PH, Pagel MD** (1991) *The comparative method in evolutionary biology*. Oxford: Oxford University  
754 Press.
- 755 **Heinrich RE, Biknevičius AR** (1998) Skeletal allometry and interlimb scaling patterns in mustelid  
756 carnivorans. *J Morphol* **235**, 121–134.
- 757 **Hildebrand M** (1985) Walking and running. In: *Functional vertebrate morphology*. (eds Hildebrand M,  
758 Bramble DM, Liem KF, Wake DB), pp. 38–57. Cambridge & London: Belknap Press.
- 759 **Hill AV** (1950) The dimensions of animals and their muscular dynamics. *Sci Prog* **38**, 209–230.
- 760 **IUCN Cat Specialist Group** (October 2011) <http://www.catsg.org>
- 761 **Iwaniuk AN, Pellis SM, Whishaw IQ** (1999) The relationship between forelimb morphology and behaviour  
762 in North American carnivores (Carnivora). *Can J Zool* **77**, 1064–1074.
- 763 **Jenkins Jr FA** (1971) Limb posture and locomotion in the Virginia opossum (*Didelphis marsupialis*) and in  
764 other non-cursorial mammals. *J Zool, Lond* **165**, 303–315.
- 765 **Jenkins Jr FA, Camazine SM** (1977) Hip structure and locomotion in ambulatory and cursorial carnivores.  
766 *J Zool, Lond* **181**, 351–370.
- 767 **Jolicoeur P** (1989) A simplified model for bivariate complex allometry. *J ther Biol* **140**, 41–49.

- 768 **Kokshenev VB** (2003) Observation of mammalian similarity through allometric scaling laws. *Phys A* **322**,  
769 491–505.
- 770 **Kokshenev VB** (2007) New insights into long-bone biomechanics: Are limb safety factors invariable across  
771 mammalian species? *J Biomech* **40**, 2911–2918.
- 772 **Lilje KE, Fischer MS** (2001) A kinematic study of a medium-sized mammal – the domestic goat. In:  
773 *Motion Systems 2001, collected short papers of the Innovationskolleg 'Bewegungssysteme'*. (ed  
774 Blickhan R), pp. 132–136. Aachen: Shaker Verlag.
- 775 **Lilje KE, Tardieu C, Fischer MS** (2003) Scaling of long bones in ruminants with respect to the scapula. *J*  
776 *Zool Syst Evol Research* **41**, 118–126.
- 777 **Llorens L, Casinos A, Berge C, Majoral M, Jouffroy FK** (2001) A biomechanical study of the long bones  
778 in Platyrrhines. *Folia Primatol* **72**, 201–216.
- 779 **Lull RS** (1904) Adaptations to aquatic, arboreal, fossorial and cursorial habits in Mammals. IV. Cursorial  
780 adaptations. *Am Nat* **38**, 1–11.
- 781 **MacDonald D** (ed) (2001) *The new encyclopedia of mammals*. Oxford: Andromeda Oxford Limited.
- 782 **Maddison WP, Maddison DR** (2010) Mesquite: a modular system for evolutionary analysis. Version 2.73.  
783 <http://mesquiteproject.org>
- 784 **Mazák V** (1981) *Panthera tigris*. *Mamm Species* **152**, 1–8.
- 785 **McMahon TA** (1973) Size and shape in biology. *Science* **179**, 1201–1204.
- 786 **McMahon TA** (1975a) Allometry and biomechanics: limb bones in adult ungulates. *Am Nat* **109**, 547–563.
- 787 **McMahon TA** (1975b) Using body size to understand the structural design of animals: quadrupedal  
788 locomotion. *J Appl Physiol* **39**, 619–627.
- 789 **Meachen-Samuels J, Van Valkenburgh B** (2009) Forelimb indicators of prey-size preference in the  
790 Felidae. *J Morphol* **270**, 729–744.
- 791 **Mech LD** (2006) Age-related body mass and reproductive measurements of gray wolves in Minnesota. *J*  
792 *Mammal* **87**, 80–84.
- 793 **Midford PE, Garland T Jr, Maddison WP** (2010) PDAP Package of Mesquite. Version 1.15.  
794 [http://mesquiteproject.org/pdap\\_mesquite/](http://mesquiteproject.org/pdap_mesquite/)
- 795 **Nyakatura K, Bininda-Emonds ORP** (2012) Updating the evolutionary history of Carnivora (Mammalia):  
796 a new species-level supertree complete with divergence time estimates. *BMC Biology* **10**, 12.
- 797 **Osburn RC** (1903) Adaptations to aquatic, arboreal, fossorial and cursorial habits in Mammals. I. Aquatic  
798 adaptations. *Am Nat* **37**, 651–665.
- 799 **Perrin WF, Würsig B, Thewissen JGM** (eds) (2002) *Encyclopedia of marine mammals*. San Diego:  
800 Academic Press.
- 801 **Ray JC** (1995) *Civettictis civetta*. *Mamm Species* **488**, 1–7.
- 802 **Reyes-Küppers R** (2007) *Ecology and behaviour of the southern river otter Lontra provocax Thomas 1908*  
803 *in Chile*. Osnabrück: Universität Osnabrück.
- 804 **Roberts MS, Gittleman JL** (1984) *Ailurus fulgens*. *Mamm Species* **222**, 1–8.

- 805 **Schmidt M** (2008) Forelimb proportions and kinematics: how are small primates different from other small  
806 mammals? *J Exp Biol* **211**, 3775–3789.
- 807 **Schmidt M, Fischer MS** (2009) Morphological integration in mammalian limb proportions: Dissociation  
808 between function and development. *Evolution* **63**, 749–766.
- 809 **Schmidt-Nielsen K** (1984) *Scaling: Why is animal size so important?* Cambridge: Cambridge University  
810 Press.
- 811 **Seyfarth A, Günther M, Blickhan R** (2001) Stable operation of an elastic three-segment leg. *Biol Cybern*  
812 **84**, 365–382.
- 813 **Silva M** (1998) Allometric scaling of body length: elastic or geometric similarity in mammalian design. *J*  
814 *Mammal* **79**, 20–32.
- 815 **Silva M, Downing JA** (1995) *CRC handbook of mammalian body masses*. Boca Raton: CRC Press.
- 816 **Sliwa A** (2004) Home range size and social organisation of black-footed cats (*Ailurus fulgens*). *Mamm Biol*  
817 **69**, 96–107.
- 818 **Smith JM, Savage RJG** (1956) Some locomotory adaptations in mammals. *Zool J Linn Soc* **42**, 603–622.
- 819 **Sokal RR, Rohlf FJ** (1995) *Biometry: The principles and practice of statistics in biological research*, 3<sup>rd</sup> ed.  
820 New York: WH Freeman and Co.
- 821 **Stein BR, Casinos A** (1997) What is a cursorial mammal? *J Zool, Lond* **242**, 185–192.
- 822 **Sunquist ME, Sunquist F** (2002) *Wild cats of the world*. Chicago: University of Chicago Press.
- 823 **Van Valkenburgh B** (1985) Locomotor diversity within past and present guilds of large predatory  
824 mammals. *Paleobiol* **11**, 406–428.
- 825 **Van Valkenburgh B** (1987) Skeletal indicators of locomotor behavior in living and extinct carnivores. *J*  
826 *Vert Paleontol* **7**, 162–182.
- 827 **Virgós E, Kowalczyk R, Trua A, de Marinis A, Mangas JG, Barea-Azcón JM, Geffen E** (2011) Body  
828 size clines in the European badger and the abundant centre hypothesis. *J Biogeogr* **38**, 1546–1556.
- 829 **Warton DI, Wright IJ, Falster DS, Westoby M** (2006) Bivariate line-fitting methods for allometry. *Biol*  
830 *Rev* **81**, 259–291.
- 831 **Wayne RK** (1986) Limb morphology of domestic and wild canids: The influence of development on  
832 morphologic change. *J Morphol* **187**, 301–319.
- 833 **Williams TM** (1983a) Locomotion in the North American mink, a semi-aquatic mammal. II. The effect of  
834 an elongated body on running energetics and gait patterns. *J Exo Biol* **103**, 155–168.
- 835 **Williams TM** (1983b) Locomotion in the North American mink, a semi-aquatic mammal. I. Swimming  
836 energetics and body drag. *J Exo Biol* **103**, 283–295.
- 837 **Williams TM** (1989) Swimming by sea otters: adaptations for low energetic cost of locomotion. *J Comp*  
838 *Physiol A* **164**, 815–824.
- 839 **Williams TM, Ben-David M, Noren S, Rutishauser M, McDonald K, Heyward W** (2002) Running  
840 energetics of the North American river otter: do short legs necessarily reduce efficiency on land?  
841 *Comp Biochem Physiol A* **133**, 203–212.

- 842 **Wilson DE, Mittermeier RA** (eds) (2009) *Handbook of the mammals of the world. Carnivores, vol. 1.*  
843 Barcelona: Lynx Edicions.
- 844 **Wozencraft WC** (2005) Order Carnivora. In: *Mammal species of the world: A taxonomic and geographic*  
845 *reference*, 3<sup>rd</sup> edn. (eds Wilson DE, Reeder DM), pp. 352–628. Baltimore: The Johns Hopkins  
846 University Press.
- 847 **Yom-Tov Y, Heggberget TM, Wiig Ø, Yom-Tov S** (2006) Body size changes among otters, *Lutra lutra*, in  
848 Norway: the possible effect of food availability and global warming. *Oecologia* **150**, 155–160.
