# Supplementary material for: Scaling pattern of the carnivoran forelimb: Locomotor types, differential scaling and thoughts on a dying similarity
Source: bioRxiv or medRxiv preprint supplement (doi:10.1101/2022.06.29.498091), 2022-08-11
Supplement: Supplementary file [file media-1.pdf]

## Supplementary Material

**Table S1. Branch length transformations used for phylogenetically independent contrasts.** Variable names are listed in [Table 3](#). Abbreviations: exp., exponential transformation; Gra., Grafen's transformation; ln, natural logarithm transformation; Nee, Nee's transformation;  $\rho_x$ , Grafen's rho transform, where x indicates the value of rho; untr., untransformed branch lengths.

|                            | whole sample |              | family       |              |              |              |              |              |              | locomotor type |              |              |              |               |             |              |
|----------------------------|--------------|--------------|--------------|--------------|--------------|--------------|--------------|--------------|--------------|----------------|--------------|--------------|--------------|---------------|-------------|--------------|
|                            | fissipeds    |              | Canidae      | Mustelidae   | Procyonidae  | Ursidae      | Felidae      | Herpestidae  | Viverridae   | arboreal       | semiarboreal | scansorial   | terrestrial  | semifossorial | semiaquatic | aquatic      |
| <b>L<sub>s</sub></b>       | $\rho_{0.5}$ | Nee          | $\rho_{0.5}$ | $\rho_{0.5}$ | untr.        | $\rho_{0.1}$ | $\rho_{0.5}$ | ln           | Nee          | exp.           | $\rho_{0.8}$ | Nee          | ln           | $\rho_{0.3}$  | Nee         | $\rho_{0.8}$ |
| <b>S</b>                   | $\rho_{0.5}$ | Nee          | Nee          | $\rho_{0.5}$ | untr.        | $\rho_{0.1}$ | $\rho_{0.5}$ | ln           | $\rho_{1.7}$ | exp.           | $\rho_{0.8}$ | Nee          | ln           | untr.         | Nee         | untr.        |
| <b>I</b>                   | Nee          | Nee          | $\rho_{0.5}$ | $\rho_{0.5}$ | ln           | $\rho_{0.5}$ | $\rho_{0.5}$ | ln           | $\rho_{1.7}$ | $\rho_{0.1}$   | $\rho_{0.8}$ | Nee          | ln           | $\rho_{0.3}$  | Nee         | $\rho_{0.8}$ |
| <b>A</b>                   | Nee          | Nee          | $\rho_{0.5}$ | $\rho_{0.5}$ | untr.        | $\rho_{0.1}$ | $\rho_{0.5}$ | ln           | Nee          | $\rho_{0.1}$   | $\rho_{0.8}$ | Nee          | ln           | $\rho_{0.3}$  | Nee         | $\rho_{0.8}$ |
| <b>H<sub>s</sub></b>       | $\rho_{0.5}$ | $\rho_{0.5}$ | Nee          | $\rho_{0.5}$ | untr.        | $\rho_{0.1}$ | $\rho_{0.5}$ | ln           | Nee          | $\rho_{0.1}$   | $\rho_{0.8}$ | Nee          | ln           | Gra.          | Nee         | ln           |
| <b>L<sub>h</sub></b>       | Nee          | $\rho_{0.5}$ | ln           | $\rho_{0.5}$ | untr.        | $\rho_{0.1}$ | $\rho_{0.5}$ | $\rho_{0.5}$ | Nee          | $\rho_{0.1}$   | $\rho_{0.8}$ | Nee          | ln           | $\rho_{0.3}$  | Nee         | Nee          |
| <b>d<sub>sh</sub></b>      | Nee          | $\rho_{0.5}$ | Nee          | $\rho_{0.5}$ | untr.        | $\rho_{0.1}$ | $\rho_{0.5}$ | untr.        | Nee          | $\rho_{0.1}$   | ln           | Nee          | ln           | $\rho_{0.3}$  | exp.        | ln           |
| <b>d<sub>th</sub></b>      | Nee          | $\rho_{0.5}$ | ln           | $\rho_{0.5}$ | Nee          | $\rho_{0.1}$ | $\rho_{0.5}$ | untr.        | $\rho_{1.7}$ | $\rho_{0.1}$   | $\rho_{0.8}$ | Nee          | ln           | $\rho_{0.3}$  | Nee         | $\rho_{0.8}$ |
| <b>T</b>                   | exp.         | exp.         | Gra.         | $\rho_{0.5}$ | $\rho_{0.5}$ | Nee          | untr.        | $\rho_{2.0}$ | $\rho_{1.7}$ | exp.           | Nee          | exp.         | exp.         | untr.         | Gra.        | untr.        |
| <b>HR</b>                  | exp.         | exp.         | Nee          | $\rho_{0.5}$ | untr.        | $\rho_{0.5}$ | $\rho_{0.5}$ | untr.        | Nee          | $\rho_{0.1}$   | Gra.         | Nee          | $\rho_{0.5}$ | Gra.          | Nee         | $\rho_{0.8}$ |
| <b>L<sub>r</sub></b>       | Nee          | $\rho_{0.5}$ | ln           | $\rho_{0.5}$ | Nee          | $\rho_{0.1}$ | untr.        | $\rho_{0.5}$ | $\rho_{1.7}$ | $\rho_{0.1}$   | $\rho_{0.8}$ | Nee          | ln           | $\rho_{0.3}$  | Gra.        | $\rho_{0.8}$ |
| <b>d<sub>sr</sub></b>      | Nee          | Nee          | $\rho_{0.5}$ | $\rho_{0.5}$ | untr.        | $\rho_{0.1}$ | $\rho_{0.5}$ | untr.        | $\rho_{1.7}$ | $\rho_{0.1}$   | $\rho_{0.8}$ | Nee          | ln           | $\rho_{0.3}$  | Nee         | $\rho_{0.8}$ |
| <b>d<sub>tr</sub></b>      | Nee          | $\rho_{0.5}$ | $\rho_{0.5}$ | ln           | Nee          | $\rho_{0.5}$ | $\rho_{0.5}$ | $\rho_{0.5}$ | $\rho_{1.7}$ | $\rho_{0.1}$   | $\rho_{0.8}$ | Nee          | ln           | $\rho_{0.3}$  | Nee         | $\rho_{0.8}$ |
| <b>P</b>                   | Nee          | Nee          | Nee          | $\rho_{0.5}$ | untr.        | Nee          | $\rho_{0.5}$ | $\rho_{0.5}$ | Nee          | $\rho_{0.1}$   | $\rho_{0.8}$ | Nee          | exp.         | untr.         | Gra.        | ln           |
| <b>RR</b>                  | exp.         | exp.         | Nee          | $\rho_{0.5}$ | untr.        | $\rho_{0.1}$ | $\rho_{0.5}$ | ln           | Nee          | $\rho_{0.1}$   | ln           | Nee          | ln           | untr.         | exp.        | Nee          |
| <b>L<sub>u</sub></b>       | Nee          | $\rho_{0.5}$ | ln           | $\rho_{0.5}$ | Nee          | $\rho_{0.1}$ | $\rho_{0.5}$ | ln           | $\rho_{1.7}$ | $\rho_{0.1}$   | $\rho_{0.8}$ | Nee          | ln           | $\rho_{0.3}$  | Gra.        | $\rho_{0.8}$ |
| <b>d<sub>su</sub></b>      | $\rho_{0.5}$ | $\rho_{0.5}$ | ln           | $\rho_{0.5}$ | Nee          | Nee          | $\rho_{0.5}$ | $\rho_{0.5}$ | $\rho_{1.7}$ | $\rho_{0.1}$   | $\rho_{0.8}$ | Nee          | ln           | untr.         | Nee         | $\rho_{0.8}$ |
| <b>d<sub>tu</sub></b>      | Nee          | exp.         | $\rho_{0.5}$ | $\rho_{0.5}$ | untr.        | $\rho_{0.1}$ | $\rho_{0.5}$ | ln           | $\rho_{1.7}$ | exp.           | $\rho_{0.8}$ | Nee          | ln           | untr.         | exp.        | $\rho_{0.8}$ |
| <b>O</b>                   | $\rho_{0.5}$ | $\rho_{0.5}$ | Nee          | $\rho_{0.5}$ | untr.        | $\rho_{0.1}$ | $\rho_{0.5}$ | ln           | Nee          | exp.           | $\rho_{0.8}$ | Nee          | ln           | untr.         | Nee         | ln           |
| <b><math>\theta</math></b> | exp.         | exp.         | Nee          | exp.         | $\rho_{0.5}$ | Nee          | untr.        | ln           | exp.         | exp.           | Nee          | $\rho_{0.5}$ | exp.         | $\rho_{0.5}$  | exp.        | ln           |
| <b><math>\alpha</math></b> | $\rho_{0.5}$ | $\rho_{0.5}$ | $\rho_{0.5}$ | ln           | ln           | $\rho_{0.1}$ | $\rho_{0.5}$ | ln           | Nee          | $\rho_{0.1}$   | ln           | Nee          | ln           | $\rho_{0.3}$  | Nee         | Nee          |
| <b>UR</b>                  | $\rho_{0.5}$ | $\rho_{0.5}$ | Nee          | ln           | Nee          | $\rho_{0.1}$ | $\rho_{0.5}$ | untr.        | Nee          | exp.           | Nee          | exp.         | ln           | Gra.          | exp.        | $\rho_{0.8}$ |
| <b>IFA</b>                 | $\rho_{0.5}$ | $\rho_{0.5}$ | ln           | $\rho_{0.5}$ | Nee          | exp.         | $\rho_{0.5}$ | ln           | Nee          | exp.           | $\rho_{0.8}$ | exp.         | ln           | $\rho_{0.3}$  | Nee         | $\rho_{0.8}$ |
| <b>L<sub>m</sub></b>       | Nee          | $\rho_{0.5}$ | $\rho_{0.5}$ | $\rho_{0.5}$ | Nee          | $\rho_{0.1}$ | $\rho_{0.5}$ | $\rho_{0.5}$ | $\rho_{1.7}$ | $\rho_{0.1}$   | ln           | Nee          | ln           | Nee           | exp.        | $\rho_{0.8}$ |
| <b>d<sub>sm</sub></b>      | Nee          | Nee          | ln           | $\rho_{0.5}$ | untr.        | Nee          | $\rho_{0.5}$ | ln           | Nee          | $\rho_{0.1}$   | ln           | Nee          | ln           | $\rho_{0.3}$  | Gra.        | Nee          |
| <b>d<sub>tm</sub></b>      | Nee          | $\rho_{0.5}$ | Nee          | ln           | ln           | $\rho_{0.1}$ | $\rho_{0.5}$ | $\rho_{0.5}$ | $\rho_{1.7}$ | $\rho_{0.1}$   | $\rho_{0.8}$ | Nee          | ln           | $\rho_{0.3}$  | Gra.        | Nee          |
| <b>MR</b>                  | $\rho_{0.5}$ | $\rho_{0.5}$ | ln           | $\rho_{0.5}$ | ln           | $\rho_{0.1}$ | $\rho_{0.5}$ | $\rho_{0.5}$ | Nee          | $\rho_{0.5}$   | Gra.         | $\rho_{0.5}$ | ln           | $\rho_{0.3}$  | Nee         | ln           |
| <b>%<sub>prox</sub></b>    | Nee          | $\rho_{0.5}$ | Nee          | ln           | untr.        | $\rho_{0.1}$ | $\rho_{0.5}$ | ln           | Nee          | $\rho_{0.1}$   | $\rho_{0.8}$ | $\rho_{0.5}$ | ln           | Gra.          | exp.        | Nee          |
| <b>%<sub>mid</sub></b>     | Nee          | Nee          | ln           | Nee          | untr.        | $\rho_{0.5}$ | untr.        | untr.        | $\rho_{1.7}$ | exp.           | Nee          | Nee          | ln           | $\rho_{0.3}$  | exp.        | Nee          |
| <b>%<sub>dist</sub></b>    | $\rho_{0.5}$ | exp.         | ln           | exp.         | Nee          | $\rho_{0.1}$ | $\rho_{0.5}$ | untr.        | exp.         | $\rho_{0.1}$   | exp.         | Nee          | ln           | Gra.          | exp.        | $\rho_{0.8}$ |

## Tables SR1 to SR30 – Results of traditional and PIC regressions

As indicated in Table 3, the following tables present the regression results for each variable. Both the results using traditional regression methods and phylogenetically independent contrasts (PIC) are shown for the whole sample and each of the subsamples (fissipeds, by Family, and by locomotor type). In each case, it is indicated (in the “sim.” columns) whether the theoretical values proposed by the geometric similarity hypothesis (G), the elastic similarity hypothesis (E), or both (B), are included in the 95% confidence interval for the slope  $b$  (95% CI <sub>$b$</sub> ). Furthermore, when neither theoretical value is included in the 95% CI <sub>$b$</sub> , it is indicated whether there is positive allometry (+;  $b$  is higher than both theoretical values), negative allometry (-;  $b$  is lower than both theoretical values), or both (nei.;  $b$  is higher than one theoretical values and lower than the other). Finally, the results of the comparison between the allometric coefficients obtained with each methodology are presented in the last column ( $b_{\text{trad}} \neq b_{\text{PIC}}$ ): a cross (×) indicates no significant differences, while a tick (✓) denotes that the slopes are significantly different from each other ( $p < 0.05$ ).

Variable names and abbreviations are given in Table 3, while the following abbreviations are common to all following tables: 95% CI <sub>$a$</sub> , 95% confidence interval for the coefficient  $a$ ; 95% CI <sub>$b$</sub> , 95% confidence interval for the allometric coefficient  $b$ ; n, sample size; n.s., unable to test differences due to non-significant regression; R, correlation coefficient; sim., similarity. Results in *grey italics* denote non-significant regressions.

| SR1 – L <sub>s</sub>  | traditional regression |       |                     |                   |                     |       |      | PIC regression |                  |                     |       |      |                                      |
|-----------------------|------------------------|-------|---------------------|-------------------|---------------------|-------|------|----------------|------------------|---------------------|-------|------|--------------------------------------|
|                       | n                      | a     | 95% CI <sub>a</sub> | b <sub>trad</sub> | 95% CI <sub>b</sub> | R     | sim. | n              | b <sub>PIC</sub> | 95% CI <sub>b</sub> | R     | sim. | b <sub>trad</sub> ≠ b <sub>PIC</sub> |
| <b>whole sample</b>   | 137                    | 3.098 | 2.662 – 3.682       | 0.356             | 0.336 – 0.374       | 0.957 | +    | 136            | 0.338            | 0.318 – 0.358       | 0.940 | G    | ×                                    |
| <b>fissipeds</b>      | 130                    | 2.667 | 2.280 – 3.166       | 0.376             | 0.356 – 0.394       | 0.957 | +    | 129            | 0.346            | 0.325 – 0.367       | 0.940 | G    | ✓                                    |
| <b>Family</b>         |                        |       |                     |                   |                     |       |      |                |                  |                     |       |      |                                      |
| Canidae               | 17                     | 1.622 | 1.043 – 3.210       | 0.445             | 0.368 – 0.493       | 0.973 | +    | 16             | 0.435            | 0.369 – 0.501       | 0.961 | +    | ×                                    |
| Mustelidae            | 32                     | 2.970 | 2.214 – 3.985       | 0.341             | 0.304 – 0.378       | 0.956 | G    | 31             | 0.330            | 0.283 – 0.377       | 0.923 | G    | ×                                    |
| Procyonidae           | 7                      | 2.121 | 0.266 – 16.901      | 0.396             | 0.139 – 0.653       | 0.825 | B    | 6              | 0.376            | 0.105 – 0.647       | 0.815 | B    | ×                                    |
| Ursidae               | 7                      | 6.492 | 2.710 – 15.551      | 0.284             | 0.210 – 0.359       | 0.974 | B    | 6              | 0.287            | 0.203 – 0.371       | 0.972 | B    | ×                                    |
| Felidae               | 26                     | 5.271 | 4.163 – 6.674       | 0.313             | 0.288 – 0.338       | 0.982 | G    | 25             | 0.317            | 0.283 – 0.351       | 0.968 | G    | ×                                    |
| Herpestidae           | 12                     | 4.577 | 3.107 – 6.741       | 0.308             | 0.254 – 0.362       | 0.968 | G    | 11             | 0.300            | 0.251 – 0.349       | 0.974 | G    | ×                                    |
| Eupleridae            | 5                      | 4.173 | 0.881 – 19.767      | 0.329             | 0.115 – 0.543       | 0.935 | B    |                |                  |                     |       |      |                                      |
| Viverridae            | 14                     | 5.077 | 2.677 – 9.630       | 0.299             | 0.220 – 0.378       | 0.907 | B    | 13             | 0.313            | 0.223 – 0.403       | 0.893 | B    | ×                                    |
| <b>Locomotor type</b> |                        |       |                     |                   |                     |       |      |                |                  |                     |       |      |                                      |
| arboreal              | 7                      | 2.219 | 0.414 – 11.900      | 0.382             | 0.174 – 0.590       | 0.881 | B    | 6              | 0.216            | 0.201 – 0.231       | 0.998 | –    | ×                                    |
| semiarboreal          | 10                     | 5.179 | 3.296 – 8.138       | 0.301             | 0.242 – 0.359       | 0.971 | B    | 9              | 0.288            | 0.185 – 0.391       | 0.903 | B    | ×                                    |
| scansorial            | 45                     | 4.017 | 3.297 – 4.894       | 0.335             | 0.314 – 0.356       | 0.978 | G    | 44             | 0.334            | 0.309 – 0.359       | 0.970 | G    | ×                                    |
| terrestrial           | 49                     | 2.056 | 1.540 – 2.961       | 0.411             | 0.367 – 0.447       | 0.963 | +    | 48             | 0.339            | 0.301 – 0.377       | 0.925 | G    | ✓                                    |
| semifossorial         | 7                      | 3.086 | 1.197 – 7.958       | 0.345             | 0.226 – 0.464       | 0.954 | B    | 6              | 0.355            | 0.220 – 0.490       | 0.952 | B    | ×                                    |
| semiaquatic           | 11                     | 3.334 | 1.226 – 9.068       | 0.329             | 0.212 – 0.446       | 0.881 | B    | 10             | 0.349            | 0.231 – 0.467       | 0.897 | B    | ×                                    |
| aquatic               | 8                      | 3.484 | 0.494 – 24.560      | 0.324             | 0.161 – 0.488       | 0.863 | B    | 7              | 0.358            | 0.154 – 0.562       | 0.841 | B    | ×                                    |

| SR2 – S               | traditional regression |              |                       |                   |                      |              |          | PIC regression |                  |                      |              |          |                                      |
|-----------------------|------------------------|--------------|-----------------------|-------------------|----------------------|--------------|----------|----------------|------------------|----------------------|--------------|----------|--------------------------------------|
|                       | n                      | a            | 95% CI <sub>a</sub>   | b <sub>trad</sub> | 95% CI <sub>b</sub>  | R            | sim.     | n              | b <sub>PIC</sub> | 95% CI <sub>b</sub>  | R            | sim.     | b <sub>trad</sub> ≠ b <sub>PIC</sub> |
| <b>whole sample</b>   | 137                    | 0.897        | 0.728 – 1.112         | 0.378             | 0.351 – 0.403        | 0.967        | +        | 136            | 0.348            | 0.326 – 0.370        | 0.930        | G        | ✓                                    |
| <b>fissipeds</b>      | 130                    | 1.045        | 0.915 – 1.216         | 0.358             | 0.342 – 0.373        | 0.971        | +        | 129            | 0.335            | 0.314 – 0.356        | 0.933        | G        | ✓                                    |
| <b>Family</b>         |                        |              |                       |                   |                      |              |          |                |                  |                      |              |          |                                      |
| Canidae               | 17                     | 0.498        | 0.305 – 1.212         | 0.432             | 0.335 – 0.486        | 0.956        | +        | 16             | 0.438            | 0.360 – 0.516        | 0.947        | +        | ×                                    |
| Mustelidae            | 32                     | 1.089        | 0.838 – 1.416         | 0.354             | 0.321 – 0.388        | 0.967        | G        | 31             | 0.337            | 0.291 – 0.383        | 0.932        | G        | ×                                    |
| Procyonidae           | 7                      | 1.615        | 0.315 – 8.270         | 0.311             | 0.109 – 0.513        | 0.825        | B        | 6              | <i>0.292</i>     | <i>0.086 – 0.498</i> | <i>0.822</i> | <i>B</i> | n.s.                                 |
| Ursidae               | 7                      | 5.843        | 3.181 – 10.732        | 0.212             | 0.161 – 0.264        | 0.977        | E        | 6              | 0.215            | 0.158 – 0.272        | 0.977        | E        | ×                                    |
| Felidae               | 26                     | 1.608        | 1.239 – 2.086         | 0.320             | 0.292 – 0.347        | 0.979        | G        | 25             | 0.322            | 0.282 – 0.362        | 0.956        | G        | ×                                    |
| Herpestidae           | 12                     | 1.430        | 1.110 – 1.842         | 0.308             | 0.272 – 0.343        | 0.987        | G        | 11             | 0.298            | 0.260 – 0.336        | 0.984        | G        | ×                                    |
| Eupleridae            | 5                      | 1.291        | 0.725 – 2.299         | 0.336             | 0.257 – 0.416        | 0.992        | G        |                |                  |                      |              |          |                                      |
| Viverridae            | 14                     | 1.720        | 0.963 – 3.072         | 0.298             | 0.226 – 0.370        | 0.924        | B        | 13             | <i>0.298</i>     | <i>0.134 – 0.462</i> | <i>0.497</i> | <i>B</i> | n.s.                                 |
| <b>Locomotor type</b> |                        |              |                       |                   |                      |              |          |                |                  |                      |              |          |                                      |
| arboreal              | 7                      | 0.733        | 0.350 – 1.538         | 0.407             | 0.315 – 0.498        | 0.981        | G        | 6              | 0.343            | 0.342 – 0.344        | 1.000        | +        | ×                                    |
| semiarboreal          | 10                     | 1.614        | 0.972 – 2.680         | 0.318             | 0.252 – 0.384        | 0.967        | G        | 9              | 0.302            | 0.188 – 0.416        | 0.892        | B        | ×                                    |
| scansorial            | 45                     | 1.266        | 1.066 – 1.503         | 0.343             | 0.325 – 0.362        | 0.984        | G        | 44             | 0.330            | 0.299 – 0.361        | 0.953        | G        | ×                                    |
| terrestrial           | 49                     | 1.154        | 0.995 – 1.369         | 0.338             | 0.318 – 0.357        | 0.983        | G        | 48             | 0.336            | 0.304 – 0.368        | 0.945        | G        | ×                                    |
| semifossorial         | 7                      | 0.537        | 0.097 – 2.959         | 0.420             | 0.205 – 0.635        | 0.895        | B        | 6              | 0.389            | 0.166 – 0.612        | 0.888        | B        | ×                                    |
| semiaquatic           | 11                     | 1.038        | 0.545 – 1.977         | 0.362             | 0.287 – 0.438        | 0.961        | G        | 10             | 0.401            | 0.295 – 0.507        | 0.939        | G        | ×                                    |
| aquatic               | 8                      | <i>0.203</i> | <i>0.001 – 28.536</i> | <i>0.517</i>      | <i>0.103 – 0.931</i> | <i>0.597</i> | <i>B</i> | 7              | <i>0.388</i>     | <i>0.130 – 0.646</i> | <i>0.773</i> | <i>B</i> | n.s.                                 |

| SR3 – I               | traditional regression |              |                            |                          |                            |              |          | PIC regression |                         |                            |              |          |                                                    |
|-----------------------|------------------------|--------------|----------------------------|--------------------------|----------------------------|--------------|----------|----------------|-------------------------|----------------------------|--------------|----------|----------------------------------------------------|
|                       | n                      | <i>a</i>     | 95% CI <sub><i>a</i></sub> | <i>b</i> <sub>trad</sub> | 95% CI <sub><i>b</i></sub> | R            | sim.     | n              | <i>b</i> <sub>PIC</sub> | 95% CI <sub><i>b</i></sub> | R            | sim.     | <i>b</i> <sub>trad</sub> ≠ <i>b</i> <sub>PIC</sub> |
| whole sample          | 137                    | 0.716        | 0.538 – 0.939              | 0.423                    | 0.392 – 0.453              | 0.927        | +        | 136            | 0.386                   | 0.356 – 0.416              | 0.892        | +        | ✓                                                  |
| fissipeds             | 130                    | 0.614        | 0.460 – 0.806              | 0.443                    | 0.412 – 0.474              | 0.924        | +        | 129            | 0.384                   | 0.358 – 0.410              | 0.922        | +        | ✓                                                  |
| <b>Family</b>         |                        |              |                            |                          |                            |              |          |                |                         |                            |              |          |                                                    |
| Canidae               | 17                     | 0.978        | 0.509 – 2.697              | 0.399                    | 0.286 – 0.472              | 0.933        | G        | 16             | 0.418                   | 0.324 – 0.512              | 0.914        | G        | ×                                                  |
| Mustelidae            | 32                     | 0.450        | 0.228 – 0.705              | 0.440                    | 0.383 – 0.497              | 0.937        | +        | 31             | 0.416                   | 0.350 – 0.482              | 0.904        | +        | ×                                                  |
| Procyonidae           | 7                      | 4.282        | 1.564 – 11.724             | 0.233                    | 0.108 – 0.357              | 0.885        | B        | 6              | <i>0.238</i>            | <i>0.066 – 0.410</i>       | <i>0.812</i> | <i>B</i> | n.s.                                               |
| Ursidae               | 7                      | 9.192        | 2.518 – 33.546             | 0.204                    | 0.094 – 0.314              | 0.883        | E        | 6              | <i>0.202</i>            | <i>0.086 – 0.318</i>       | <i>0.866</i> | <i>E</i> | n.s.                                               |
| Felidae               | 26                     | 1.884        | 1.410 – 2.517              | 0.330                    | 0.299 – 0.360              | 0.975        | G        | 25             | 0.347                   | 0.302 – 0.392              | 0.951        | G        | ×                                                  |
| Herpestidae           | 12                     | 1.830        | 1.083 – 3.094              | 0.316                    | 0.243 – 0.390              | 0.944        | B        | 11             | 0.317                   | 0.248 – 0.386              | 0.953        | B        | ×                                                  |
| Eupleridae            | 5                      | 0.624        | 0.068 – 5.761              | 0.451                    | 0.145 – 0.758              | 0.929        | B        |                |                         |                            |              |          |                                                    |
| Viverridae            | 14                     | 2.579        | 1.429 – 4.653              | 0.289                    | 0.216 – 0.362              | 0.916        | B        | 13             | 0.323                   | 0.234 – 0.412              | 0.901        | B        | ×                                                  |
| <b>Locomotor type</b> |                        |              |                            |                          |                            |              |          |                |                         |                            |              |          |                                                    |
| arboreal              | 7                      | 1.561        | 0.735 – 3.316              | 0.357                    | 0.264 – 0.450              | 0.974        | G        | 6              | 0.357                   | 0.255 – 0.459              | 0.973        | G        | ×                                                  |
| semiarboreal          | 10                     | 1.883        | 0.769 – 4.606              | 0.320                    | 0.204 – 0.437              | 0.895        | B        | 9              | 0.299                   | 0.219 – 0.379              | 0.947        | B        | ×                                                  |
| scansorial            | 45                     | 1.113        | 0.850 – 1.458              | 0.385                    | 0.356 – 0.414              | 0.969        | +        | 44             | 0.385                   | 0.340 – 0.430              | 0.925        | +        | ×                                                  |
| terrestrial           | 49                     | 0.450        | 0.294 – 0.763              | 0.477                    | 0.418 – 0.526              | 0.932        | +        | 48             | 0.362                   | 0.317 – 0.407              | 0.907        | G        | ✓                                                  |
| semifossorial         | 7                      | 0.497        | 0.089 – 2.781              | 0.446                    | 0.229 – 0.662              | 0.906        | B        | 6              | 0.475                   | 0.249 – 0.701              | 0.924        | B        | ×                                                  |
| semiaquatic           | 11                     | 0.425        | 0.085 – 2.115              | 0.449                    | 0.261 – 0.637              | 0.832        | G        | 10             | 0.459                   | 0.293 – 0.625              | 0.883        | G        | ×                                                  |
| aquatic               | 8                      | <i>0.151</i> | <i>0.001 – 16.286</i>      | <i>0.527</i>             | <i>0.135 – 0.919</i>       | <i>0.667</i> | <i>B</i> | 7              | <i>0.556</i>            | <i>0.024 – 1.088</i>       | <i>0.412</i> | <i>B</i> | n.s.                                               |

| SR4 – A               | traditional regression |          |                            |                          |                            |       |      | PIC regression |                         |                            |              |          |                                                    |
|-----------------------|------------------------|----------|----------------------------|--------------------------|----------------------------|-------|------|----------------|-------------------------|----------------------------|--------------|----------|----------------------------------------------------|
|                       | n                      | <i>a</i> | 95% CI <sub><i>a</i></sub> | <i>b</i> <sub>trad</sub> | 95% CI <sub><i>b</i></sub> | R     | sim. | n              | <i>b</i> <sub>PIC</sub> | 95% CI <sub><i>b</i></sub> | R            | sim.     | <i>b</i> <sub>trad</sub> ≠ <i>b</i> <sub>PIC</sub> |
| whole sample          | 137                    | 1.774    | 1.500 – 2.112              | 0.392                    | 0.373 – 0.410              | 0.970 | +    | 136            | 0.355                   | 0.333 – 0.377              | 0.931        | G        | ✓                                                  |
| fissipeds             | 130                    | 1.785    | 1.518 – 2.087              | 0.391                    | 0.374 – 0.409              | 0.965 | +    | 129            | 0.353                   | 0.332 – 0.374              | 0.940        | G        | ✓                                                  |
| <b>Family</b>         |                        |          |                            |                          |                            |       |      |                |                         |                            |              |          |                                                    |
| Canidae               | 17                     | 1.391    | 0.776 – 3.607              | 0.419                    | 0.316 – 0.483              | 0.954 | G    | 16             | 0.428                   | 0.348 – 0.508              | 0.941        | +        | ×                                                  |
| Mustelidae            | 32                     | 1.564    | 1.134 – 2.157              | 0.387                    | 0.346 – 0.428              | 0.959 | +    | 31             | 0.366                   | 0.313 – 0.414              | 0.921        | G        | ×                                                  |
| Procyonidae           | 7                      | 4.772    | 1.770 – 12.868             | 0.285                    | 0.162 – 0.408              | 0.927 | B    | 6              | <b>0.286</b>            | <b>0.111 – 0.461</b>       | <b>0.870</b> | <b>B</b> | n.s.                                               |
| Ursidae               | 7                      | 18.339   | 8.036 – 41.855             | 0.191                    | 0.121 – 0.261              | 0.948 | E    | 6              | 0.191                   | 0.116 – 0.266              | 0.949        | E        | ×                                                  |
| Felidae               | 26                     | 3.476    | 2.743 – 4.405              | 0.327                    | 0.302 – 0.352              | 0.983 | G    | 25             | 0.335                   | 0.298 – 0.372              | 0.965        | G        | ×                                                  |
| Herpestidae           | 12                     | 3.643    | 2.675 – 4.961              | 0.301                    | 0.258 – 0.344              | 0.979 | G    | 11             | 0.300                   | 0.255 – 0.345              | 0.978        | G        | ×                                                  |
| Eupleridae            | 5                      | 2.216    | 0.745 – 6.586              | 0.369                    | 0.218 – 0.519              | 0.975 | B    |                |                         |                            |              |          |                                                    |
| Viverridae            | 14                     | 4.444    | 2.757 – 7.164              | 0.288                    | 0.229 – 0.347              | 0.945 | B    | 13             | 0.297                   | 0.237 – 0.357              | 0.948        | B        | ×                                                  |
| <b>Locomotor type</b> |                        |          |                            |                          |                            |       |      |                |                         |                            |              |          |                                                    |
| arboreal              | 7                      | 2.544    | 1.433 – 4.517              | 0.360                    | 0.288 – 0.431              | 0.985 | G    | 6              | 0.358                   | 0.278 – 0.438              | 0.984        | G        | ×                                                  |
| semiarboreal          | 10                     | 4.124    | 2.636 – 6.452              | 0.300                    | 0.241 – 0.358              | 0.971 | B    | 9              | 0.277                   | 0.210 – 0.344              | 0.958        | B        | ×                                                  |
| scansorial            | 45                     | 2.386    | 1.964 – 2.899              | 0.365                    | 0.344 – 0.386              | 0.982 | +    | 44             | 0.360                   | 0.325 – 0.395              | 0.951        | G        | ×                                                  |
| terrestrial           | 49                     | 1.612    | 1.281 – 2.121              | 0.399                    | 0.369 – 0.425              | 0.969 | +    | 48             | 0.345                   | 0.309 – 0.381              | 0.935        | G        | ✓                                                  |
| semifossorial         | 7                      | 1.304    | 0.392 – 4.336              | 0.409                    | 0.258 – 0.560              | 0.947 | G    | 6              | 0.420                   | 0.262 – 0.578              | 0.953        | G        | ×                                                  |
| semiaquatic           | 11                     | 1.449    | 0.598 – 3.512              | 0.399                    | 0.295 – 0.502              | 0.939 | G    | 10             | 0.425                   | 0.317 – 0.533              | 0.943        | G        | ×                                                  |
| aquatic               | 8                      | 0.997    | 0.038 – 26.417             | 0.439                    | 0.165 – 0.714              | 0.780 | B    | 7              | <b>0.373</b>            | <b>0.090 – 0.656</b>       | <b>0.693</b> | <b>B</b> | n.s.                                               |

| SR5 – Hs              | traditional regression |              |                            |                          |                            |              |      | PIC regression |                         |                            |              |      |                                                    |  |
|-----------------------|------------------------|--------------|----------------------------|--------------------------|----------------------------|--------------|------|----------------|-------------------------|----------------------------|--------------|------|----------------------------------------------------|--|
|                       | n                      | <i>a</i>     | 95% CI <sub><i>a</i></sub> | <i>b</i> <sub>trad</sub> | 95% CI <sub><i>b</i></sub> | R            | sim. | n              | <i>b</i> <sub>PIC</sub> | 95% CI <sub><i>b</i></sub> | R            | sim. | <i>b</i> <sub>trad</sub> ≠ <i>b</i> <sub>PIC</sub> |  |
| whole sample          | 137                    | 0.171        | 0.100 – 0.292              | 0.454                    | 0.393 – 0.515              | 0.822        | +    | 136            | 0.463                   | 0.416 – 0.510              | 0.804        | +    | ×                                                  |  |
| fissipeds             | 130                    | 0.114        | 0.068 – 0.198              | 0.510                    | 0.449 – 0.568              | 0.897        | +    | 129            | 0.474                   | 0.429 – 0.519              | 0.839        | +    | ×                                                  |  |
| <b>Family</b>         |                        |              |                            |                          |                            |              |      |                |                         |                            |              |      |                                                    |  |
| Canidae               | 17                     | 0.166        | 0.100 – 0.440              | 0.480                    | 0.374 – 0.534              | 0.947        | +    | 16             | 0.441                   | 0.353 – 0.529              | 0.933        | +    | ×                                                  |  |
| Mustelidae            | 32                     | 0.073        | 0.032 – 0.165              | 0.548                    | 0.444 – 0.653              | 0.860        | +    | 31             | 0.497                   | 0.384 – 0.610              | 0.791        | +    | ×                                                  |  |
| Procyonidae           | 7                      | 0.111        | 0.008 – 1.459              | 0.531                    | 0.212 – 0.850              | 0.852        | B    | 6              | <i>0.523</i>            | <i>0.152 – 0.894</i>       | <i>0.821</i> | B    | n.s.                                               |  |
| Ursidae               | 7                      | 2.019        | 0.341 – 11.971             | 0.237                    | 0.086 – 0.389              | 0.831        | B    | 6              | <i>0.235</i>            | <i>0.071 – 0.399</i>       | <i>0.829</i> | B    | n.s.                                               |  |
| Felidae               | 26                     | 0.320        | 0.192 – 0.532              | 0.407                    | 0.353 – 0.461              | 0.949        | +    | 25             | 0.437                   | 0.361 – 0.513              | 0.913        | +    | ×                                                  |  |
| Herpestidae           | 12                     | 0.827        | 0.434 – 1.573              | 0.278                    | 0.188 – 0.368              | 0.887        | B    | 11             | 0.250                   | 0.158 – 0.342              | 0.858        | B    | ×                                                  |  |
| Eupleridae            | 5                      | 0.310        | 0.036 – 2.665              | 0.397                    | 0.101 – 0.693              | 0.914        | B    |                |                         |                            |              |      |                                                    |  |
| Viverridae            | 14                     | 0.223        | 0.102 – 0.484              | 0.431                    | 0.335 – 0.528              | 0.935        | +    | 13             | 0.450                   | 0.329 – 0.571              | 0.906        | G    | ×                                                  |  |
| <b>Locomotor type</b> |                        |              |                            |                          |                            |              |      |                |                         |                            |              |      |                                                    |  |
| arboreal              | 7                      | 0.219        | 0.044 – 1.098              | 0.429                    | 0.229 – 0.628              | 0.914        | B    | 6              | 0.425                   | 0.215 – 0.635              | 0.917        | B    | ×                                                  |  |
| semiarboreal          | 10                     | 0.220        | 0.084 – 0.576              | 0.442                    | 0.317 – 0.567              | 0.938        | G    | 9              | 0.441                   | 0.232 – 0.650              | 0.825        | B    | ×                                                  |  |
| scansorial            | 45                     | 0.270        | 0.201 – 0.364              | 0.420                    | 0.388 – 0.452              | 0.968        | +    | 44             | 0.435                   | 0.384 – 0.486              | 0.924        | +    | ×                                                  |  |
| terrestrial           | 49                     | 0.096        | 0.044 – 0.224              | 0.535                    | 0.434 – 0.625              | 0.916        | +    | 48             | 0.455                   | 0.388 – 0.522              | 0.866        | +    | ×                                                  |  |
| semifossorial         | 7                      | <i>0.005</i> | <i>0.000 – 2.586</i>       | <i>0.866</i>             | <i>0.089 – 1.644</i>       | <i>0.626</i> | B    | 6              | <i>0.564</i>            | <i>0.068 – 1.060</i>       | <i>0.706</i> | B    | n.s.                                               |  |
| semiaquatic           | 11                     | 0.024        | 0.002 – 0.369              | 0.667                    | 0.349 – 0.985              | 0.775        | +    | 10             | <i>0.847</i>            | <i>0.338 – 1.356</i>       | <i>0.623</i> | +    | n.s.                                               |  |
| aquatic               | 8                      | <i>0.038</i> | <i>0.000 – 11.844</i>      | <i>0.483</i>             | <i>0.000 – 0.965</i>       | <i>0.004</i> | B    | 7              | <i>0.580</i>            | <i>-0.007 – 1.167</i>      | <i>0.263</i> | B    | n.s.                                               |  |

| SR6 – L <sub>h</sub>  | traditional regression |          |                            |                          |                            |       |      | PIC regression |                         |                            |              |          |                                                    |  |
|-----------------------|------------------------|----------|----------------------------|--------------------------|----------------------------|-------|------|----------------|-------------------------|----------------------------|--------------|----------|----------------------------------------------------|--|
|                       | n                      | <i>a</i> | 95% CI <sub><i>a</i></sub> | <i>b</i> <sub>trad</sub> | 95% CI <sub><i>b</i></sub> | R     | sim. | n              | <i>b</i> <sub>PIC</sub> | 95% CI <sub><i>b</i></sub> | R            | sim.     | <i>b</i> <sub>trad</sub> ≠ <i>b</i> <sub>PIC</sub> |  |
| whole sample          | 137                    | 5.994    | 4.878 – 7.355              | 0.318                    | 0.293 – 0.344              | 0.909 | G    | 136            | 0.311                   | 0.289 – 0.333              | 0.911        | nei.     | ×                                                  |  |
| fissipeds             | 130                    | 4.580    | 3.959 – 5.399              | 0.354                    | 0.334 – 0.370              | 0.946 | +    | 129            | 0.311                   | 0.290 – 0.332              | 0.924        | nei.     | ✓                                                  |  |
| <b>Family</b>         |                        |          |                            |                          |                            |       |      |                |                         |                            |              |          |                                                    |  |
| Canidae               | 17                     | 3.350    | 1.705 – 11.350             | 0.401                    | 0.263 – 0.478              | 0.920 | G    | 16             | 0.415                   | 0.314 – 0.516              | 0.898        | G        | ×                                                  |  |
| Mustelidae            | 32                     | 6.018    | 4.208 – 8.608              | 0.298                    | 0.252 – 0.344              | 0.912 | G    | 31             | 0.292                   | 0.244 – 0.340              | 0.897        | B        | ×                                                  |  |
| Procyonidae           | 7                      | 13.706   | 5.597 – 33.563             | 0.224                    | 0.113 – 0.335              | 0.902 | B    | 6              | <i>0.219</i>            | <i>0.081 – 0.357</i>       | <i>0.861</i> | <i>B</i> | n.s.                                               |  |
| Ursidae               | 7                      | 13.772   | 6.344 – 29.899             | 0.252                    | 0.186 – 0.318              | 0.974 | E    | 6              | 0.256                   | 0.186 – 0.326              | 0.975        | E        | ×                                                  |  |
| Felidae               | 26                     | 9.680    | 7.805 – 12.006             | 0.285                    | 0.263 – 0.308              | 0.982 | nei. | 25             | 0.295                   | 0.264 – 0.326              | 0.969        | nei.     | ×                                                  |  |
| Herpestidae           | 12                     | 6.732    | 3.892 – 11.644             | 0.299                    | 0.222 – 0.375              | 0.931 | B    | 11             | 0.285                   | 0.213 – 0.357              | 0.935        | B        | ×                                                  |  |
| Eupleridae            | 5                      | 5.553    | 3.834 – 8.042              | 0.338                    | 0.287 – 0.389              | 0.997 | G    |                |                         |                            |              |          |                                                    |  |
| Viverridae            | 14                     | 11.070   | 6.159 – 19.896             | 0.248                    | 0.175 – 0.321              | 0.885 | E    | 13             | 0.282                   | 0.204 – 0.360              | 0.901        | B        | ×                                                  |  |
| <b>Locomotor type</b> |                        |          |                            |                          |                            |       |      |                |                         |                            |              |          |                                                    |  |
| arboreal              | 7                      | 5.956    | 2.087 – 16.997             | 0.334                    | 0.204 – 0.463              | 0.941 | B    | 6              | 0.334                   | 0.193 – 0.475              | 0.940        | B        | ×                                                  |  |
| semiarboreal          | 10                     | 10.101   | 6.958 – 14.664             | 0.270                    | 0.222 – 0.319              | 0.975 | E    | 9              | 0.241                   | 0.147 – 0.335              | 0.884        | B        | ×                                                  |  |
| scansorial            | 45                     | 6.878    | 5.800 – 8.156              | 0.316                    | 0.298 – 0.335              | 0.982 | G    | 44             | 0.314                   | 0.289 – 0.339              | 0.966        | G        | ×                                                  |  |
| terrestrial           | 49                     | 3.645    | 2.899 – 5.137              | 0.381                    | 0.338 – 0.408              | 0.959 | +    | 48             | 0.323                   | 0.282 – 0.364              | 0.900        | G        | ✓                                                  |  |
| semifossorial         | 7                      | 4.750    | 1.793 – 12.584             | 0.324                    | 0.201 – 0.446              | 0.944 | B    | 6              | 0.336                   | 0.197 – 0.475              | 0.942        | B        | ×                                                  |  |
| semiaquatic           | 11                     | 8.410    | 3.903 – 18.128             | 0.256                    | 0.166 – 0.346              | 0.885 | B    | 10             | 0.269                   | 0.183 – 0.355              | 0.911        | B        | ×                                                  |  |
| aquatic               | 8                      | 10.127   | 1.925 – 53.281             | 0.222                    | 0.083 – 0.361              | 0.779 | B    | 7              | <i>0.237</i>            | <i>0.090 – 0.384</i>       | <i>0.808</i> | <i>B</i> | n.s.                                               |  |



| SR7 – d <sub>sh</sub> | traditional regression |       |                     |                   |                     |       |      | PIC regression |                  |                      |              |          |                                      |  |
|-----------------------|------------------------|-------|---------------------|-------------------|---------------------|-------|------|----------------|------------------|----------------------|--------------|----------|--------------------------------------|--|
|                       | n                      | a     | 95% CI <sub>a</sub> | b <sub>trad</sub> | 95% CI <sub>b</sub> | R     | sim. | n              | b <sub>PIC</sub> | 95% CI <sub>b</sub>  | R            | sim.     | b <sub>trad</sub> ≠ b <sub>PIC</sub> |  |
| whole sample          | 137                    | 0.396 | 0.352 – 0.454       | 0.376             | 0.362 – 0.389       | 0.975 | E    | 136            | 0.383            | 0.359 – 0.407        | 0.933        | E        | ×                                    |  |
| fissipeds             | 130                    | 0.371 | 0.329 – 0.432       | 0.385             | 0.368 – 0.399       | 0.971 | E    | 129            | 0.387            | 0.361 – 0.413        | 0.927        | E        | ×                                    |  |
| <b>Family</b>         |                        |       |                     |                   |                     |       |      |                |                  |                      |              |          |                                      |  |
| Canidae               | 17                     | 0.138 | 0.071 – 0.467       | 0.488             | 0.355 – 0.560       | 0.959 | E    | 16             | 0.454            | 0.372 – 0.536        | 0.945        | E        | ×                                    |  |
| Mustelidae            | 32                     | 0.326 | 0.226 – 0.469       | 0.399             | 0.352 – 0.445       | 0.950 | E    | 31             | 0.386            | 0.319 – 0.453        | 0.883        | B        | ×                                    |  |
| Procyonidae           | 7                      | 0.496 | 0.117 – 2.092       | 0.370             | 0.191 – 0.548       | 0.908 | B    | 6              | <i>0.366</i>     | <i>0.147 – 0.585</i> | <i>0.876</i> | <i>B</i> | n.s.                                 |  |
| Ursidae               | 7                      | 0.962 | 0.607 – 1.522       | 0.293             | 0.254 – 0.332       | 0.993 | –    | 6              | 0.295            | 0.252 – 0.338        | 0.993        | G        | ×                                    |  |
| Felidae               | 26                     | 0.353 | 0.271 – 0.459       | 0.393             | 0.365 – 0.421       | 0.986 | E    | 25             | 0.382            | 0.341 – 0.423        | 0.968        | E        | ×                                    |  |
| Herpestidae           | 12                     | 0.676 | 0.424 – 1.078       | 0.302             | 0.237 – 0.368       | 0.952 | G    | 11             | 0.322            | 0.262 – 0.382        | 0.966        | B        | ×                                    |  |
| Eupleridae            | 5                      | 0.151 | 0.043 – 0.529       | 0.515             | 0.342 – 0.688       | 0.983 | E    |                |                  |                      |              |          |                                      |  |
| Viverridae            | 14                     | 0.474 | 0.209 – 1.077       | 0.349             | 0.248 – 0.451       | 0.887 | B    | 13             | 0.338            | 0.263 – 0.413        | 0.937        | B        | ×                                    |  |
| <b>Locomotor type</b> |                        |       |                     |                   |                     |       |      |                |                  |                      |              |          |                                      |  |
| arboreal              | 7                      | 0.443 | 0.269 – 0.730       | 0.375             | 0.313 – 0.437       | 0.990 | B    | 6              | 0.371            | 0.305 – 0.437        | 0.990        | B        | ×                                    |  |
| semiarboreal          | 10                     | 0.320 | 0.189 – 0.542       | 0.416             | 0.347 – 0.485       | 0.979 | E    | 9              | 0.418            | 0.333 – 0.503        | 0.970        | B        | ×                                    |  |
| scansorial            | 45                     | 0.374 | 0.302 – 0.465       | 0.384             | 0.360 – 0.407       | 0.980 | E    | 44             | 0.382            | 0.347 – 0.417        | 0.956        | E        | ×                                    |  |
| terrestrial           | 49                     | 0.372 | 0.300 – 0.500       | 0.381             | 0.347 – 0.406       | 0.968 | E    | 48             | 0.354            | 0.312 – 0.396        | 0.917        | B        | ×                                    |  |
| semifossorial         | 7                      | 0.502 | 0.211 – 1.197       | 0.337             | 0.227 – 0.446       | 0.959 | B    | 6              | 0.350            | 0.211 – 0.489        | 0.948        | B        | ×                                    |  |
| semiaquatic           | 11                     | 0.294 | 0.094 – 0.922       | 0.418             | 0.284 – 0.552       | 0.906 | B    | 10             | 0.527            | 0.279 – 0.775        | 0.791        | B        | ×                                    |  |
| aquatic               | 8                      | 0.249 | 0.025 – 2.525       | 0.407             | 0.213 – 0.601       | 0.879 | B    | 7              | 0.443            | 0.261 – 0.625        | 0.920        | B        | n.s.                                 |  |

| SR8 – d <sub>th</sub> | traditional regression |       |                     |                   |                     |       |      | PIC regression |                  |                      |              |          |                                      |  |
|-----------------------|------------------------|-------|---------------------|-------------------|---------------------|-------|------|----------------|------------------|----------------------|--------------|----------|--------------------------------------|--|
|                       | n                      | a     | 95% CI <sub>a</sub> | b <sub>trad</sub> | 95% CI <sub>b</sub> | R     | sim. | n              | b <sub>PIC</sub> | 95% CI <sub>b</sub>  | R            | sim.     | b <sub>trad</sub> ≠ b <sub>PIC</sub> |  |
| <b>whole sample</b>   | 137                    | 0.319 | 0.281 – 0.365       | 0.369             | 0.354 – 0.384       | 0.973 | E    | 136            | 0.347            | 0.324 – 0.370        | 0.923        | G        | ×                                    |  |
| <b>fissipeds</b>      | 130                    | 0.322 | 0.285 – 0.372       | 0.368             | 0.353 – 0.383       | 0.968 | E    | 129            | 0.341            | 0.319 – 0.363        | 0.931        | G        | ✓                                    |  |
| <b>Family</b>         |                        |       |                     |                   |                     |       |      |                |                  |                      |              |          |                                      |  |
| Canidae               | 17                     | 0.185 | 0.084 – 0.505       | 0.430             | 0.320 – 0.517       | 0.941 | B    | 16             | 0.426            | 0.328 – 0.524        | 0.910        | B        | ×                                    |  |
| Mustelidae            | 32                     | 0.466 | 0.348 – 0.623       | 0.307             | 0.270 – 0.344       | 0.946 | G    | 31             | 0.319            | 0.270 – 0.368        | 0.910        | G        | ×                                    |  |
| Procyonidae           | 7                      | 0.810 | 0.370 – 1.772       | 0.267             | 0.170 – 0.364       | 0.949 | G    | 6              | 0.261            | 0.167 – 0.355        | 0.957        | G        | ×                                    |  |
| Ursidae               | 7                      | 2.289 | 0.776 – 6.751       | 0.208             | 0.116 – 0.300       | 0.923 | –    | 6              | 0.209            | 0.109 – 0.309        | 0.922        | –        | ×                                    |  |
| Felidae               | 26                     | 0.381 | 0.288 – 0.505       | 0.354             | 0.324 – 0.384       | 0.980 | B    | 25             | 0.339            | 0.301 – 0.377        | 0.964        | B        | ×                                    |  |
| Herpestidae           | 12                     | 0.811 | 0.494 – 1.330       | 0.242             | 0.173 – 0.312       | 0.913 | –    | 11             | 0.254            | 0.189 – 0.319        | 0.934        | –        | ×                                    |  |
| Eupleridae            | 5                      | 0.204 | 0.084 – 0.496       | 0.439             | 0.316 – 0.561       | 0.988 | B    |                |                  |                      |              |          |                                      |  |
| Viverridae            | 14                     | 0.430 | 0.225 – 0.825       | 0.331             | 0.251 – 0.412       | 0.922 | B    | 13             | 0.488            | 0.308 – 0.668        | 0.814        | B        | ×                                    |  |
| <b>Locomotor type</b> |                        |       |                     |                   |                     |       |      |                |                  |                      |              |          |                                      |  |
| arboreal              | 7                      | 0.533 | 0.280 – 1.015       | 0.318             | 0.238 – 0.398       | 0.976 | B    | 6              | 0.315            | 0.228 – 0.402        | 0.975        | B        | ×                                    |  |
| semiarboreal          | 10                     | 0.363 | 0.184 – 0.716       | 0.362             | 0.274 – 0.451       | 0.954 | B    | 9              | 0.374            | 0.233 – 0.515        | 0.892        | B        | ×                                    |  |
| scansorial            | 45                     | 0.303 | 0.253 – 0.363       | 0.379             | 0.359 – 0.398       | 0.986 | E    | 44             | 0.349            | 0.320 – 0.378        | 0.963        | B        | ✓                                    |  |
| terrestrial           | 49                     | 0.335 | 0.281 – 0.426       | 0.361             | 0.334 – 0.382       | 0.967 | E    | 48             | 0.342            | 0.301 – 0.383        | 0.915        | B        | ×                                    |  |
| semifossorial         | 7                      | 0.432 | 0.196 – 0.954       | 0.322             | 0.222 – 0.421       | 0.963 | B    | 6              | 0.335            | 0.188 – 0.482        | 0.935        | B        | ×                                    |  |
| semiaquatic           | 11                     | 0.671 | 0.312 – 1.444       | 0.263             | 0.173 – 0.353       | 0.892 | G    | 10             | 0.307            | 0.194 – 0.420        | 0.878        | B        | ×                                    |  |
| aquatic               | 8                      | 0.084 | 0.005 – 1.511       | 0.479             | 0.237 – 0.720       | 0.863 | B    | 7              | <b>0.450</b>     | <b>0.152 – 0.748</b> | <b>0.775</b> | <b>B</b> | n.s.                                 |  |

| SR9 – T               | traditional regression |          |                            |                          |                                             |       |      | PIC regression |                         |                                             |       |      |                                                    |  |
|-----------------------|------------------------|----------|----------------------------|--------------------------|---------------------------------------------|-------|------|----------------|-------------------------|---------------------------------------------|-------|------|----------------------------------------------------|--|
|                       | n                      | <i>a</i> | 95% CI <sub><i>a</i></sub> | <i>b</i> <sub>trad</sub> | 95% CI <sub><i>b</i></sub>                  | R     | sim. | n              | <i>b</i> <sub>PIC</sub> | 95% CI <sub><i>b</i></sub>                  | R     | sim. | <i>b</i> <sub>trad</sub> ≠ <i>b</i> <sub>PIC</sub> |  |
| whole sample          | 137                    | 0.558    | 0.162 – 1.071              | $6.14 \cdot 10^{-5}$     | $2.68 \cdot 10^{-5} - 7.63 \cdot 10^{-5}$   | 0.619 | +    | 136            | $4.12 \cdot 10^{-5}$    | $3.43 \cdot 10^{-5} - 4.81 \cdot 10^{-5}$   | 0.190 | +    | ×                                                  |  |
| fissipeds             | 130                    | 0.447    | 0.137 – 0.927              | $6.56 \cdot 10^{-5}$     | $4.68 \cdot 10^{-6} - 9.11 \cdot 10^{-5}$   | 0.251 | +    | 129            | $4.22 \cdot 10^{-5}$    | $3.49 \cdot 10^{-6} - 4.95 \cdot 10^{-5}$   | 0.157 | +    | n.s.                                               |  |
| <b>Family</b>         |                        |          |                            |                          |                                             |       |      |                |                         |                                             |       |      |                                                    |  |
| Canidae               | 17                     | 1.560    | 0.840 – 2.499              | $1.88 \cdot 10^{-4}$     | $6.55 \cdot 10^{-5} - 2.55 \cdot 10^{-4}$   | 0.763 | +    | 16             | $1.34 \cdot 10^{-4}$    | $7.12 \cdot 10^{-5} - 1.97 \cdot 10^{-4}$   | 0.530 | +    | ×                                                  |  |
| Mustelidae            | 32                     | 0.545    | 0.127 – 1.824              | $-1.17 \cdot 10^{-4}$    | $-4.22 \cdot 10^{-4} - -7.62 \cdot 10^{-5}$ | 0.288 | –    | 31             | $-1.19 \cdot 10^{-4}$   | $-1.59 \cdot 10^{-4} - -7.87 \cdot 10^{-5}$ | 0.419 | –    | n.s.                                               |  |
| Procyonidae           | 7                      | -1.081   | -2.525 – 0.362             | $3.00 \cdot 10^{-4}$     | $2.72 \cdot 10^{-6} - 0.001$                | 0.174 | +    | 6              | $3.34 \cdot 10^{-4}$    | $-7.96 \cdot 10^{-5} - 7.48 \cdot 10^{-4}$  | 0.075 | B    | n.s.                                               |  |
| Ursidae               | 7                      | -2.861   | -6.636 – 0.913             | $2.09 \cdot 10^{-5}$     | $-3.87 \cdot 10^{-5} - 5.91 \cdot 10^{-5}$  | 0.462 | B    | 6              | $2.25 \cdot 10^{-5}$    | $-3.93 \cdot 10^{-6} - 4.89 \cdot 10^{-5}$  | 0.327 | B    | n.s.                                               |  |
| Felidae               | 26                     | 1.374    | 0.832 – 1.916              | $5.71 \cdot 10^{-5}$     | $1.38 \cdot 10^{-5} - 7.08 \cdot 10^{-5}$   | 0.892 | +    | 25             | $5.47 \cdot 10^{-5}$    | $4.24 \cdot 10^{-5} - 6.70 \cdot 10^{-5}$   | 0.847 | +    | ×                                                  |  |
| Herpestidae           | 12                     | 0.248    | -0.187 – 0.683             | $4.50 \cdot 10^{-4}$     | $3.00 \cdot 10^{-4} - 0.001$                | 0.710 | +    | 11             | $4.42 \cdot 10^{-4}$    | $1.75 \cdot 10^{-4} - 7.09 \cdot 10^{-4}$   | 0.530 | +    | n.s.                                               |  |
| Eupleridae            | 5                      | 1.408    | -0.147 – 6.976             | $-5.63 \cdot 10^{-4}$    | $-0.005 - -3.75 \cdot 10^{-4}$              | 0.271 | –    |                |                         |                                             |       |      |                                                    |  |
| Viverridae            | 14                     | -0.339   | -1.351 – 0.674             | $3.28 \cdot 10^{-4}$     | $1.13 \cdot 10^{-4} - 8.69 \cdot 10^{-4}$   | 0.560 | +    | 13             | $2.93 \cdot 10^{-4}$    | $1.50 \cdot 10^{-4} - 4.36 \cdot 10^{-4}$   | 0.637 | +    | ×                                                  |  |
| <b>Locomotor type</b> |                        |          |                            |                          |                                             |       |      |                |                         |                                             |       |      |                                                    |  |
| arboreal              | 7                      | -0.584   | -5.474 – 1.021             | $1.71 \cdot 10^{-4}$     | $-6.07 \cdot 10^{-4} - 0.002$               | 0.063 | B    | 6              | $6.30 \cdot 10^{-5}$    | $4.10 \cdot 10^{-5} - 8.50 \cdot 10^{-5}$   | 0.960 | +    | n.s.                                               |  |
| semiarboreal          | 10                     | -0.769   | -2.612 – -0.087            | $2.55 \cdot 10^{-4}$     | $4.97 \cdot 10^{-5} - 9.93 \cdot 10^{-4}$   | 0.508 | +    | 9              | $2.53 \cdot 10^{-4}$    | $1.02 \cdot 10^{-4} - 4.04 \cdot 10^{-4}$   | 0.702 | +    | n.s.                                               |  |
| scansorial            | 45                     | 0.233    | -0.487 – 0.929             | $4.64 \cdot 10^{-5}$     | $2.16 \cdot 10^{-5} - 6.63 \cdot 10^{-5}$   | 0.440 | +    | 44             | $5.14 \cdot 10^{-5}$    | $4.33 \cdot 10^{-5} - 5.95 \cdot 10^{-5}$   | 0.861 | +    | ×                                                  |  |
| terrestrial           | 49                     | 1.596    | -0.963 – 3.215             | $7.61 \cdot 10^{-5}$     | $-2.15 \cdot 10^{-4} - 1.99 \cdot 10^{-4}$  | 0.131 | B    | 48             | $1.31 \cdot 10^{-4}$    | $1.10 \cdot 10^{-4} - 1.52 \cdot 10^{-4}$   | 0.838 | +    | n.s.                                               |  |
| semifossorial         | 7                      | -0.264   | -0.728 – 0.151             | $1.96 \cdot 10^{-4}$     | $1.34 \cdot 10^{-4} - 2.90 \cdot 10^{-4}$   | 0.898 | +    | 6              | $1.89 \cdot 10^{-4}$    | $7.46 \cdot 10^{-5} - 3.03 \cdot 10^{-4}$   | 0.873 | +    | n.s.                                               |  |
| semiaquatic           | 11                     | 0.705    | -0.246 – 2.327             | $-9.49 \cdot 10^{-5}$    | $-2.74 \cdot 10^{-4} - 7.69 \cdot 10^{-5}$  | 0.115 | B    | 10             | $-8.41 \cdot 10^{-5}$   | $-1.47 \cdot 10^{-4} - -2.11 \cdot 10^{-5}$ | 0.229 | –    | n.s.                                               |  |
| aquatic               | 8                      | 1.444    | -21.620 – 14.430           | $5.67 \cdot 10^{-5}$     | $-2.95 \cdot 10^{-5} - 1.92 \cdot 10^{-4}$  | 0.642 | B    | 7              | $4.75 \cdot 10^{-5}$    | $1.82 \cdot 10^{-5} - 7.68 \cdot 10^{-5}$   | 0.809 | +    | n.s.                                               |  |

| SR10 – HR             | traditional regression |          |                              |                          |                            |       |      | PIC regression |                         |                               |       |      |                                                    |
|-----------------------|------------------------|----------|------------------------------|--------------------------|----------------------------|-------|------|----------------|-------------------------|-------------------------------|-------|------|----------------------------------------------------|
|                       | n                      | <i>a</i> | 95% CI <sub><i>a</i></sub>   | <i>b</i> <sub>trad</sub> | 95% CI <sub><i>b</i></sub> | R     | sim. | n              | <i>b</i> <sub>PIC</sub> | 95% CI <sub><i>b</i></sub>    | R     | sim. | <i>b</i> <sub>trad</sub> ≠ <i>b</i> <sub>PIC</sub> |
| <b>whole sample</b>   | 137                    | 0.029    | 0.023 – 0.036                | 0.156                    | 0.128 – 0.184              | 0.499 | +    | 136            | 0.221                   | 0.186 – 0.256                 | 0.388 | +    | ✓                                                  |
| <b>fissipeds</b>      | 130                    | 0.034    | 0.028 – 0.044                | 0.132                    | 0.101 – 0.157              | 0.289 | E    | 129            | 0.222                   | 0.186 – 0.258                 | 0.381 | +    | ✓                                                  |
| <b>Family</b>         |                        |          |                              |                          |                            |       |      |                |                         |                               |       |      |                                                    |
| Canidae               | 17                     | 0.015    | $4.19 \cdot 10^{-4} - 0.046$ | 0.198                    | 0.071 – 0.589              | 0.500 | E    | 16             | 0.216                   | 0.097 – 0.335                 | 0.073 | E    | n.s.                                               |
| Mustelidae            | 32                     | 0.028    | 0.018 – 0.047                | 0.186                    | 0.125 – 0.240              | 0.575 | E    | 31             | 0.181                   | 0.120 – 0.242                 | 0.431 | E    | ×                                                  |
| Procyonidae           | 7                      | 0.024    | $4.28 \cdot 10^{-4} - 0.071$ | 0.200                    | 0.060 – 0.674              | 0.674 | E    | 6              | 0.201                   | 0.014 – 0.388                 | 0.662 | E    | n.s.                                               |
| Ursidae               | 7                      | 0.046    | 0.004 – 0.106                | 0.076                    | 0.005 – 0.292              | 0.575 | E    | 6              | 0.073                   | -0.006 – 0.152                | 0.495 | B    | n.s.                                               |
| Felidae               | 26                     | 0.030    | 0.023 – 0.040                | 0.130                    | 0.098 – 0.154              | 0.823 | E    | 25             | 0.134                   | 0.090 – 0.178                 | 0.626 | E    | ×                                                  |
| Herpestidae           | 12                     | 0.030    | 0.002 – 0.079                | 0.174                    | 0.030 – 0.563              | 0.055 | E    | 11             | 0.168                   | 0.055 – 0.281                 | 0.335 | E    | n.s.                                               |
| Eupleridae            | 5                      | 0.025    | 0.013 – 0.189                | 0.190                    | -0.118 – 0.275             | 0.909 | B    |                |                         |                               |       |      |                                                    |
| Viverridae            | 14                     | 0.031    | 0.020 – 0.067                | 0.141                    | 0.043 – 0.193              | 0.651 | E    | 13             | 0.140                   | 0.061 – 0.219                 | 0.456 | E    | n.s.                                               |
| <b>Locomotor type</b> |                        |          |                              |                          |                            |       |      |                |                         |                               |       |      |                                                    |
| arboreal              | 7                      | 0.034    | $5.96 \cdot 10^{-4} - 0.150$ | 0.140                    | -0.059 – 0.646             | 0.408 | B    | 6              | 0.124                   | $-3.60 \cdot 10^{-4} - 0.248$ | 0.584 | B    | n.s.                                               |
| semiarboreal          | 10                     | 0.024    | 0.013 – 0.057                | 0.180                    | 0.069 – 0.252              | 0.806 | E    | 9              | 0.246                   | 0.097 – 0.395                 | 0.690 | E    | ×                                                  |
| scansorial            | 45                     | 0.038    | 0.032 – 0.048                | 0.105                    | 0.080 – 0.125              | 0.615 | E    | 44             | 0.128                   | 0.094 – 0.162                 | 0.484 | E    | ×                                                  |
| terrestrial           | 49                     | 0.042    | 0.006 – 0.055                | 0.109                    | 0.079 – 0.362              | 0.028 | E    | 48             | 0.134                   | 0.096 – 0.172                 | 0.265 | E    | n.s.                                               |
| semifossorial         | 7                      | 0.064    | 0.014 – 0.092                | 0.076                    | 0.021 – 0.260              | 0.227 | E    | 6              | 0.064                   | -0.013 – 0.141                | 0.273 | B    | n.s.                                               |
| semiaquatic           | 11                     | 0.015    | 0.006 – 0.115                | 0.260                    | 0.022 – 0.367              | 0.583 | E    | 10             | 0.291                   | 0.111 – 0.471                 | 0.592 | E    | n.s.                                               |
| aquatic               | 8                      | 0.007    | $3.94 \cdot 10^{-5} - 0.603$ | 0.296                    | -0.058 – 0.744             | 0.625 | B    | 7              | 0.261                   | 0.094 – 0.428                 | 0.794 | E    | n.s.                                               |

| SR11 – L <sub>r</sub> | traditional regression |        |                     |                   |                     |       |      | PIC regression |                  |                     |       |      |                                      |
|-----------------------|------------------------|--------|---------------------|-------------------|---------------------|-------|------|----------------|------------------|---------------------|-------|------|--------------------------------------|
|                       | n                      | a      | 95% CI <sub>a</sub> | b <sub>trad</sub> | 95% CI <sub>b</sub> | R     | sim. | n              | b <sub>PIC</sub> | 95% CI <sub>b</sub> | R     | sim. | b <sub>trad</sub> ≠ b <sub>PIC</sub> |
| <b>whole sample</b>   | 137                    | 3.503  | 2.778 – 4.515       | 0.362             | 0.331 – 0.390       | 0.896 | G    | 136            | 0.352            | 0.326 – 0.378       | 0.899 | G    | ×                                    |
| <b>fissipeds</b>      | 130                    | 2.692  | 2.158 – 3.436       | 0.397             | 0.368 – 0.423       | 0.910 | +    | 129            | 0.344            | 0.318 – 0.370       | 0.900 | G    | ✓                                    |
| <b>Family</b>         |                        |        |                     |                   |                     |       |      |                |                  |                     |       |      |                                      |
| Canidae               | 17                     | 2.019  | 0.816 – 10.965      | 0.454             | 0.269 – 0.557       | 0.879 | G    | 16             | 0.476            | 0.332 – 0.620       | 0.839 | G    | ×                                    |
| Mustelidae            | 32                     | 3.649  | 2.378 – 5.600       | 0.325             | 0.270 – 0.379       | 0.893 | G    | 31             | 0.318            | 0.266 – 0.370       | 0.897 | G    | ×                                    |
| Procyonidae           | 7                      | 5.160  | 1.453 – 18.328      | 0.325             | 0.168 – 0.482       | 0.907 | B    | 6              | 0.300            | 0.181 – 0.419       | 0.946 | B    | ×                                    |
| Ursidae               | 7                      | 10.348 | 5.301 – 20.199      | 0.260             | 0.203 – 0.317       | 0.982 | E    | 6              | 0.261            | 0.197 – 0.325       | 0.980 | E    | ×                                    |
| Felidae               | 26                     | 8.534  | 5.789 – 12.579      | 0.288             | 0.246 – 0.329       | 0.940 | E    | 25             | 0.337            | 0.282 – 0.392       | 0.922 | G    | ×                                    |
| Herpestidae           | 12                     | 3.392  | 1.410 – 8.158       | 0.368             | 0.245 – 0.492       | 0.880 | B    | 11             | 0.354            | 0.234 – 0.474       | 0.881 | B    | ×                                    |
| Eupleridae            | 5                      | 8.373  | 1.676 – 41.831      | 0.269             | 0.048 – 0.491       | 0.894 | B    |                |                  |                     |       |      |                                      |
| Viverridae            | 14                     | 8.179  | 4.764 – 14.044      | 0.262             | 0.195 – 0.329       | 0.914 | B    | 13             | 0.291            | 0.156 – 0.426       | 0.682 | B    | ×                                    |
| <b>Locomotor type</b> |                        |        |                     |                   |                     |       |      |                |                  |                     |       |      |                                      |
| arboreal              | 7                      | 3.606  | 0.891 – 14.601      | 0.363             | 0.190 – 0.536       | 0.910 | B    | 6              | 0.368            | 0.184 – 0.552       | 0.915 | B    | ×                                    |
| semiarboreal          | 10                     | 9.473  | 6.558 – 13.683      | 0.250             | 0.202 – 0.298       | 0.972 | E    | 9              | 0.226            | 0.133 – 0.319       | 0.872 | E    | ×                                    |
| scansorial            | 45                     | 5.991  | 4.633 – 7.748       | 0.317             | 0.290 – 0.345       | 0.958 | G    | 44             | 0.336            | 0.300 – 0.372       | 0.939 | G    | ×                                    |
| terrestrial           | 49                     | 1.709  | 1.167 – 2.768       | 0.457             | 0.396 – 0.506       | 0.941 | +    | 48             | 0.361            | 0.312 – 0.410       | 0.890 | G    | ✓                                    |
| semifossorial         | 7                      | 3.434  | 0.908 – 12.985      | 0.342             | 0.175 – 0.510       | 0.905 | B    | 6              | 0.362            | 0.184 – 0.540       | 0.918 | B    | ×                                    |
| semiaquatic           | 11                     | 4.515  | 1.267 – 16.083      | 0.293             | 0.144 – 0.442       | 0.739 | B    | 10             | 0.239            | 0.142 – 0.336       | 0.850 | B    | ×                                    |
| aquatic               | 8                      | 2.372  | 0.424 – 13.268      | 0.347             | 0.203 – 0.491       | 0.909 | B    | 7              | 0.338            | 0.192 – 0.484       | 0.911 | B    | ×                                    |

| SR12 – d <sub>sr</sub> | traditional regression |       |                     |                   |                     |       |      | PIC regression |                  |                      |              |          |                                      |  |
|------------------------|------------------------|-------|---------------------|-------------------|---------------------|-------|------|----------------|------------------|----------------------|--------------|----------|--------------------------------------|--|
|                        | n                      | a     | 95% CI <sub>a</sub> | b <sub>trad</sub> | 95% CI <sub>b</sub> | R     | sim. | n              | b <sub>PIC</sub> | 95% CI <sub>b</sub>  | R            | sim.     | b <sub>trad</sub> ≠ b <sub>PIC</sub> |  |
| whole sample           | 137                    | 0.282 | 0.244 – 0.327       | 0.335             | 0.318 – 0.352       | 0.961 | G    | 136            | 0.358            | 0.331 – 0.385        | 0.894        | B        | ×                                    |  |
| fissipeds              | 130                    | 0.270 | 0.233 – 0.316       | 0.341             | 0.323 – 0.357       | 0.956 | G    | 129            | 0.357            | 0.330 – 0.384        | 0.902        | B        | ×                                    |  |
| <b>Family</b>          |                        |       |                     |                   |                     |       |      |                |                  |                      |              |          |                                      |  |
| Canidae                | 17                     | 0.096 | 0.052 – 0.327       | 0.465             | 0.329 – 0.531       | 0.936 | B    | 16             | 0.427            | 0.326 – 0.528        | 0.905        | B        | ×                                    |  |
| Mustelidae             | 32                     | 0.291 | 0.202 – 0.421       | 0.326             | 0.279 – 0.373       | 0.922 | G    | 31             | 0.342            | 0.277 – 0.407        | 0.863        | B        | ×                                    |  |
| Procyonidae            | 7                      | 0.485 | 0.154 – 1.528       | 0.275             | 0.133 – 0.417       | 0.893 | B    | 6              | 0.254            | 0.129 – 0.379        | 0.917        | B        | ×                                    |  |
| Ursidae                | 7                      | 0.314 | 0.035 – 2.851       | 0.320             | 0.132 – 0.508       | 0.860 | B    | 6              | <i>0.328</i>     | <i>0.127 – 0.529</i> | <i>0.870</i> | <i>B</i> | n.s.                                 |  |
| Felidae                | 26                     | 0.154 | 0.107 – 0.221       | 0.391             | 0.353 – 0.430       | 0.972 | E    | 25             | 0.395            | 0.339 – 0.451        | 0.942        | E        | ×                                    |  |
| Herpestidae            | 12                     | 0.339 | 0.150 – 0.770       | 0.321             | 0.206 – 0.436       | 0.862 | B    | 11             | 0.367            | 0.248 – 0.486        | 0.891        | B        | ×                                    |  |
| Eupleridae             | 5                      | 0.325 | 0.129 – 0.819       | 0.318             | 0.191 – 0.445       | 0.976 | B    |                |                  |                      |              |          |                                      |  |
| Viverridae             | 14                     | 0.331 | 0.197 – 0.558       | 0.314             | 0.250 – 0.379       | 0.945 | B    | 13             | 0.349            | 0.217 – 0.481        | 0.803        | B        | ×                                    |  |
| <b>Locomotor type</b>  |                        |       |                     |                   |                     |       |      |                |                  |                      |              |          |                                      |  |
| arboreal               | 7                      | 0.219 | 0.068 – 0.705       | 0.361             | 0.216 – 0.506       | 0.937 | B    | 6              | 0.362            | 0.208 – 0.516        | 0.939        | B        | ×                                    |  |
| semiarboreal           | 10                     | 0.672 | 0.443 – 1.021       | 0.228             | 0.173 – 0.282       | 0.956 | –    | 9              | 0.232            | 0.164 – 0.300        | 0.937        | –        | ×                                    |  |
| scansorial             | 45                     | 0.247 | 0.196 – 0.312       | 0.346             | 0.321 – 0.371       | 0.971 | G    | 44             | 0.367            | 0.327 – 0.407        | 0.935        | B        | ×                                    |  |
| terrestrial            | 49                     | 0.248 | 0.195 – 0.343       | 0.358             | 0.320 – 0.387       | 0.959 | B    | 48             | 0.342            | 0.299 – 0.385        | 0.903        | B        | ×                                    |  |
| semifossorial          | 7                      | 0.255 | 0.098 – 0.662       | 0.345             | 0.225 – 0.465       | 0.953 | B    | 6              | 0.362            | 0.220 – 0.504        | 0.949        | B        | ×                                    |  |
| semiaquatic            | 11                     | 0.183 | 0.072 – 0.466       | 0.382             | 0.273 – 0.492       | 0.925 | B    | 10             | 0.459            | 0.286 – 0.632        | 0.872        | B        | ×                                    |  |
| aquatic                | 8                      | 0.020 | 0.001 – 0.483       | 0.545             | 0.277 – 0.813       | 0.871 | B    | 7              | <i>0.544</i>     | <i>0.136 – 0.952</i> | <i>0.700</i> | <i>B</i> | n.s.                                 |  |

| SR13 – d <sub>tr</sub> | traditional regression |       |                     |                   |                     |       |      | PIC regression |                  |                     |       |      |                                      |
|------------------------|------------------------|-------|---------------------|-------------------|---------------------|-------|------|----------------|------------------|---------------------|-------|------|--------------------------------------|
|                        | n                      | a     | 95% CI <sub>a</sub> | b <sub>trad</sub> | 95% CI <sub>b</sub> | R     | sim. | n              | b <sub>PIC</sub> | 95% CI <sub>b</sub> | R     | sim. | b <sub>trad</sub> ≠ b <sub>PIC</sub> |
| <b>whole sample</b>    | 137                    | 0.140 | 0.117 – 0.171       | 0.442             | 0.420 – 0.463       | 0.962 | +    | 136            | 0.403            | 0.375 – 0.431       | 0.910 | +    | ✓                                    |
| <b>fissipeds</b>       | 130                    | 0.160 | 0.136 – 0.198       | 0.425             | 0.400 – 0.444       | 0.953 | +    | 129            | 0.389            | 0.361 – 0.417       | 0.914 | E    | ✓                                    |
| <b>Family</b>          |                        |       |                     |                   |                     |       |      |                |                  |                     |       |      |                                      |
| Canidae                | 17                     | 0.134 | 0.081 – 0.348       | 0.465             | 0.364 – 0.519       | 0.947 | E    | 16             | 0.478            | 0.388 – 0.570       | 0.938 | +    | ×                                    |
| Mustelidae             | 32                     | 0.239 | 0.169 – 0.338       | 0.352             | 0.308 – 0.397       | 0.942 | B    | 31             | 0.382            | 0.308 – 0.456       | 0.857 | B    | ×                                    |
| Procyonidae            | 7                      | 0.320 | 0.077 – 1.335       | 0.355             | 0.178 – 0.531       | 0.901 | B    | 6              | 0.347            | 0.163 – 0.531       | 0.904 | B    | ×                                    |
| Ursidae                | 7                      | 0.301 | 0.038 – 2.387       | 0.357             | 0.181 – 0.534       | 0.903 | B    | 6              | 0.317            | 0.167 – 0.467       | 0.925 | B    | ×                                    |
| Felidae                | 26                     | 0.240 | 0.188 – 0.306       | 0.389             | 0.363 – 0.415       | 0.988 | E    | 25             | 0.379            | 0.345 – 0.413       | 0.977 | E    | ×                                    |
| Herpestidae            | 12                     | 0.336 | 0.112 – 1.002       | 0.318             | 0.165 – 0.472       | 0.729 | B    | 11             | 0.310            | 0.158 – 0.462       | 0.728 | B    | ×                                    |
| Eupleridae             | 5                      | 0.161 | 0.072 – 0.362       | 0.438             | 0.326 – 0.549       | 0.990 | B    |                |                  |                     |       |      |                                      |
| Viverridae             | 14                     | 0.253 | 0.116 – 0.552       | 0.360             | 0.263 – 0.456       | 0.904 | B    | 13             | 0.420            | 0.265 – 0.575       | 0.816 | B    | ×                                    |
| <b>Locomotor type</b>  |                        |       |                     |                   |                     |       |      |                |                  |                     |       |      |                                      |
| arboreal               | 7                      | 0.245 | 0.066 – 0.909       | 0.383             | 0.220 – 0.545       | 0.929 | B    | 6              | 0.386            | 0.216 – 0.556       | 0.935 | B    | ×                                    |
| semiarboreal           | 10                     | 0.213 | 0.090 – 0.502       | 0.397             | 0.286 – 0.509       | 0.939 | B    | 9              | 0.366            | 0.253 – 0.479       | 0.929 | B    | ×                                    |
| scansorial             | 45                     | 0.203 | 0.162 – 0.256       | 0.401             | 0.376 – 0.425       | 0.980 | +    | 44             | 0.387            | 0.353 – 0.421       | 0.958 | E    | ×                                    |
| terrestrial            | 49                     | 0.127 | 0.093 – 0.195       | 0.458             | 0.406 – 0.494       | 0.948 | +    | 48             | 0.375            | 0.320 – 0.430       | 0.865 | B    | ✓                                    |
| semifossorial          | 7                      | 0.209 | 0.051 – 0.860       | 0.376             | 0.157 – 0.554       | 0.911 | B    | 6              | 0.401            | 0.182 – 0.620       | 0.898 | B    | ×                                    |
| semiaquatic            | 11                     | 0.385 | 0.185 – 0.800       | 0.294             | 0.208 – 0.380       | 0.922 | B    | 10             | 0.320            | 0.228 – 0.412       | 0.928 | B    | ×                                    |
| aquatic                | 8                      | 0.031 | 0.003 – 0.277       | 0.581             | 0.398 – 0.764       | 0.949 | +    | 7              | 0.500            | 0.264 – 0.736       | 0.893 | B    | ×                                    |

| SR14 – P              | traditional regression |          |                            |                          |                            |       |      | PIC regression |                         |                            |              |          |                                                    |  |
|-----------------------|------------------------|----------|----------------------------|--------------------------|----------------------------|-------|------|----------------|-------------------------|----------------------------|--------------|----------|----------------------------------------------------|--|
|                       | n                      | <i>a</i> | 95% CI <sub><i>a</i></sub> | <i>b</i> <sub>trad</sub> | 95% CI <sub><i>b</i></sub> | R     | sim. | n              | <i>b</i> <sub>PIC</sub> | 95% CI <sub><i>b</i></sub> | R            | sim.     | <i>b</i> <sub>trad</sub> ≠ <i>b</i> <sub>PIC</sub> |  |
| whole sample          | 137                    | 0.101    | 0.085 – 0.122              | 0.426                    | 0.404 – 0.446              | 0.956 | +    | 136            | 0.412                   | 0.380 – 0.444              | 0.892        | +        | ×                                                  |  |
| fissipeds             | 130                    | 0.088    | 0.074 – 0.108              | 0.444                    | 0.421 – 0.464              | 0.952 | +    | 129            | 0.414                   | 0.381 – 0.447              | 0.888        | +        | ×                                                  |  |
| <b>Family</b>         |                        |          |                            |                          |                            |       |      |                |                         |                            |              |          |                                                    |  |
| Canidae               | 17                     | 0.046    | 0.016 – 0.095              | 0.514                    | 0.428 – 0.624              | 0.960 | +    | 16             | 0.488                   | 0.396 – 0.580              | 0.940        | +        | ×                                                  |  |
| Mustelidae            | 32                     | 0.161    | 0.110 – 0.236              | 0.350                    | 0.302 – 0.399              | 0.929 | G    | 31             | 0.347                   | 0.276 – 0.418              | 0.838        | G        | ×                                                  |  |
| Procyonidae           | 7                      | 0.186    | 0.028 – 1.241              | 0.352                    | 0.117 – 0.587              | 0.814 | B    | <i>6</i>       | <i>0.325</i>            | <i>0.095 – 0.555</i>       | <i>0.820</i> | <i>B</i> | n.s.                                               |  |
| Ursidae               | 7                      | 0.147    | 0.016 – 1.360              | 0.399                    | 0.210 – 0.589              | 0.911 | B    | 6              | 0.357                   | 0.159 – 0.555              | 0.894        | B        | ×                                                  |  |
| Felidae               | 26                     | 0.182    | 0.131 – 0.253              | 0.380                    | 0.345 – 0.415              | 0.976 | +    | 25             | 0.369                   | 0.325 – 0.413              | 0.959        | G        | ×                                                  |  |
| Herpestidae           | 12                     | 0.164    | 0.075 – 0.361              | 0.374                    | 0.264 – 0.484              | 0.908 | G    | 11             | 0.353                   | 0.241 – 0.465              | 0.897        | B        | ×                                                  |  |
| Eupleridae            | 5                      | 0.027    | 0.001 – 1.001              | 0.611                    | 0.113 – 1.108              | 0.896 | B    |                |                         |                            |              |          |                                                    |  |
| Viverridae            | 14                     | 0.096    | 0.029 – 0.321              | 0.424                    | 0.275 – 0.574              | 0.828 | G    | 13             | 0.483                   | 0.292 – 0.674              | 0.783        | G        | ×                                                  |  |
| <b>Locomotor type</b> |                        |          |                            |                          |                            |       |      |                |                         |                            |              |          |                                                    |  |
| arboreal              | 7                      | 0.026    | 0.001 – 0.455              | 0.588                    | 0.233 – 0.943              | 0.851 | B    | <i>6</i>       | <i>0.589</i>            | <i>0.211 – 0.967</i>       | <i>0.935</i> | <i>B</i> | n.s.                                               |  |
| semiarboreal          | 10                     | 0.063    | 0.022 – 0.180              | 0.496                    | 0.360 – 0.633              | 0.941 | +    | 9              | 0.475                   | 0.274 – 0.676              | 0.929        | G        | ×                                                  |  |
| scansorial            | 45                     | 0.089    | 0.066 – 0.119              | 0.448                    | 0.416 – 0.480              | 0.972 | +    | 44             | 0.421                   | 0.373 – 0.469              | 0.958        | +        | ×                                                  |  |
| terrestrial           | 49                     | 0.092    | 0.070 – 0.130              | 0.442                    | 0.400 – 0.475              | 0.956 | +    | 48             | 0.294                   | 0.255 – 0.333              | 0.865        | G        | ✓                                                  |  |
| semifossorial         | 7                      | 0.280    | 0.110 – 0.709              | 0.292                    | 0.175 – 0.409              | 0.937 | B    | 6              | 0.313                   | 0.178 – 0.448              | 0.898        | B        | ×                                                  |  |
| semiaquatic           | 11                     | 0.117    | 0.028 – 0.478              | 0.386                    | 0.220 – 0.551              | 0.823 | B    | <i>10</i>      | <i>0.330</i>            | <i>0.100 – 0.560</i>       | <i>0.928</i> | <i>B</i> | n.s.                                               |  |
| aquatic               | 8                      | 0.037    | 0.004 – 0.354              | 0.487                    | 0.298 – 0.676              | 0.922 | G    | 7              | 0.481                   | 0.277 – 0.685              | 0.893        | G        | ×                                                  |  |



| SR15 – RR             | traditional regression |          |                              |                          |                            |       |          | PIC regression |                         |                            |       |          |                                                    |
|-----------------------|------------------------|----------|------------------------------|--------------------------|----------------------------|-------|----------|----------------|-------------------------|----------------------------|-------|----------|----------------------------------------------------|
|                       | n                      | <i>a</i> | 95% CI <sub><i>a</i></sub>   | <i>b</i> <sub>trad</sub> | 95% CI <sub><i>b</i></sub> | R     | sim.     | n              | <i>b</i> <sub>PIC</sub> | 95% CI <sub><i>b</i></sub> | R     | sim.     | <i>b</i> <sub>trad</sub> ≠ <i>b</i> <sub>PIC</sub> |
| whole sample          | 137                    | 0.250    | 0.209 – 4.676                | -0.158                   | -0.496 – -0.135            | 0.021 | –        | 136            | 0.200                   | 0.169 – 0.231              | 0.409 | +        | n.s.                                               |
| fissipeds             | 130                    | 0.258    | 0.196 – 0.322                | -0.169                   | -0.196 – -0.134            | 0.214 | –        | 129            | 0.198                   | 0.167 – 0.229              | 0.422 | +        | ✓                                                  |
| <b>Family</b>         |                        |          |                              |                          |                            |       |          |                |                         |                            |       |          |                                                    |
| Canidae               | 17                     | 0.005    | $1.27 \cdot 10^{-5}$ – 0.025 | 0.260                    | 0.080 – 0.915              | 0.141 | <i>E</i> | 16             | -0.324                  | -0.499 – -0.149            | 0.223 | –        | n.s.                                               |
| Mustelidae            | 32                     | 0.028    | 0.003 – 0.039                | 0.139                    | 0.097 – 0.432              | 0.080 | <i>E</i> | 31             | 0.161                   | 0.101 – 0.221              | 0.062 | <i>E</i> | n.s.                                               |
| Procyonidae           | 7                      | 0.121    | 0.033 – 0.375                | -0.081                   | -0.224 – 0.070             | 0.585 | <i>B</i> | 6              | -0.088                  | -0.180 – 0.004             | 0.542 | <i>B</i> | n.s.                                               |
| Ursidae               | 7                      | 0.008    | $1.43 \cdot 10^{-5}$ – 0.055 | 0.169                    | 0.002 – 0.712              | 0.082 | <i>E</i> | 6              | 0.168                   | -0.038 – 0.374             | 0.142 | <i>B</i> | n.s.                                               |
| Felidae               | 26                     | 0.011    | 0.008 – 0.017                | 0.155                    | 0.112 – 0.189              | 0.709 | <i>E</i> | 25             | 0.165                   | 0.103 – 0.227              | 0.458 | <i>E</i> | ×                                                  |
| Herpestidae           | 12                     | 0.449    | 0.155 – 46.774               | -0.259                   | -0.922 – -0.116            | 0.177 | –        | 11             | 0.243                   | 0.070 – 0.416              | 0.096 | <i>E</i> | n.s.                                               |
| Eupleridae            | 5                      | 0.028    | 0.005 – 0.107                | 0.093                    | -0.113 – 0.348             | 0.735 | <i>B</i> |                |                         |                            |       |          |                                                    |
| Viverridae            | 14                     | 0.026    | 0.019 – 0.046                | 0.108                    | 0.038 – 0.147              | 0.543 | <i>E</i> | 13             | 0.108                   | 0.045 – 0.171              | 0.396 | <i>E</i> | n.s.                                               |
| <b>Locomotor type</b> |                        |          |                              |                          |                            |       |          |                |                         |                            |       |          |                                                    |
| arboreal              | 7                      | 0.009    | $5.40 \cdot 10^{-7}$ – 0.029 | 0.237                    | 0.106 – 1.454              | 0.047 | <i>E</i> | 6              | -0.190                  | -0.425 – 0.045             | 0.030 | <i>B</i> | n.s.                                               |
| semiarboreal          | 10                     | 0.124    | 0.085 – 0.691                | -0.095                   | -0.326 – -0.051            | 0.263 | –        | 9              | 0.106                   | 0.018 – 0.194              | 0.115 | <i>E</i> | n.s.                                               |
| scansorial            | 45                     | 0.016    | 0.011 – 0.023                | 0.129                    | 0.093 – 0.171              | 0.242 | <i>E</i> | 44             | 0.142                   | 0.099 – 0.185              | 0.189 | <i>E</i> | n.s.                                               |
| terrestrial           | 49                     | 0.247    | 0.163 – 0.328                | -0.164                   | -0.201 – -0.110            | 0.528 | –        | 48             | -0.165                  | -0.214 – -0.116            | 0.073 | –        | n.s.                                               |
| semifossorial         | 7                      | 0.033    | 0.004 – 0.067                | 0.104                    | 0.002 – 0.361              | 0.193 | <i>E</i> | 6              | 0.120                   | -0.029 – 0.269             | 0.064 | <i>B</i> | n.s.                                               |
| semiaquatic           | 11                     | 0.010    | 0.003 – 0.079                | 0.252                    | 0.027 – 0.387              | 0.547 | <i>E</i> | 10             | 0.248                   | 0.131 – 0.365              | 0.789 | +        | n.s.                                               |
| aquatic               | 8                      | 0.004    | $3.55 \cdot 10^{-6}$ – 0.205 | 0.260                    | -0.061 – 0.832             | 0.613 | <i>B</i> | 7              | 0.266                   | 0.239 – 0.293              | 0.276 | +        | n.s.                                               |

| SR16 – L <sub>u</sub> | traditional regression |        |                     |                   |                     |       |      | PIC regression |                  |                     |       |      |                                      |  |
|-----------------------|------------------------|--------|---------------------|-------------------|---------------------|-------|------|----------------|------------------|---------------------|-------|------|--------------------------------------|--|
|                       | n                      | a      | 95% CI <sub>a</sub> | b <sub>trad</sub> | 95% CI <sub>b</sub> | R     | sim. | n              | b <sub>PIC</sub> | 95% CI <sub>b</sub> | R     | sim. | b <sub>trad</sub> ≠ b <sub>PIC</sub> |  |
| <b>whole sample</b>   | 136                    | 3.841  | 3.046 – 4.922       | 0.358             | 0.327 – 0.385       | 0.897 | G    | 135            | 0.347            | 0.321 – 0.373       | 0.897 | G    | ×                                    |  |
| <b>fissipeds</b>      | 129                    | 2.926  | 2.411 – 3.644       | 0.394             | 0.367 – 0.418       | 0.916 | +    | 128            | 0.340            | 0.314 – 0.366       | 0.902 | G    | ✓                                    |  |
| <b>Family</b>         |                        |        |                     |                   |                     |       |      |                |                  |                     |       |      |                                      |  |
| Canidae               | 16                     | 2.170  | 0.856 – 12.076      | 0.452             | 0.258 – 0.556       | 0.884 | G    | 15             | 0.474            | 0.326 – 0.622       | 0.841 | G    | ×                                    |  |
| Mustelidae            | 32                     | 4.037  | 2.665 – 6.115       | 0.322             | 0.269 – 0.375       | 0.898 | G    | 31             | 0.315            | 0.263 – 0.367       | 0.896 | G    | ×                                    |  |
| Procyonidae           | 7                      | 5.692  | 1.569 – 20.645      | 0.318             | 0.159 – 0.478       | 0.900 | B    | 6              | 0.293            | 0.174 – 0.412       | 0.945 | B    | ×                                    |  |
| Ursidae               | 7                      | 10.831 | 6.606 – 17.759      | 0.262             | 0.220 – 0.304       | 0.990 | E    | 6              | 0.263            | 0.216 – 0.310       | 0.990 | E    | ×                                    |  |
| Felidae               | 26                     | 9.200  | 6.415 – 13.195      | 0.286             | 0.248 – 0.324       | 0.948 | E    | 25             | 0.317            | 0.267 – 0.367       | 0.928 | G    | ×                                    |  |
| Herpestidae           | 12                     | 3.710  | 1.629 – 8.452       | 0.363             | 0.247 – 0.478       | 0.892 | B    | 11             | 0.334            | 0.230 – 0.438       | 0.900 | B    | ×                                    |  |
| Eupleridae            | 5                      | 8.643  | 2.236 – 33.406      | 0.270             | 0.083 – 0.456       | 0.927 | B    |                |                  |                     |       |      |                                      |  |
| Viverridae            | 14                     | 8.785  | 5.053 – 15.275      | 0.260             | 0.191 – 0.328       | 0.908 | E    | 13             | 0.291            | 0.147 – 0.435       | 0.631 | B    | ×                                    |  |
| <b>Locomotor type</b> |                        |        |                     |                   |                     |       |      |                |                  |                     |       |      |                                      |  |
| arboreal              | 7                      | 3.573  | 0.863 – 14.800      | 0.371             | 0.195 – 0.547       | 0.911 | B    | 6              | 0.377            | 0.190 – 0.564       | 0.917 | B    | ×                                    |  |
| semiarboreal          | 10                     | 9.563  | 6.305 – 14.505      | 0.257             | 0.203 – 0.311       | 0.966 | E    | 9              | 0.227            | 0.130 – 0.324       | 0.860 | E    | ×                                    |  |
| scansorial            | 45                     | 6.234  | 4.849 – 8.013       | 0.319             | 0.292 – 0.346       | 0.961 | G    | 44             | 0.332            | 0.299 – 0.365       | 0.945 | G    | ×                                    |  |
| terrestrial           | 48                     | 1.893  | 1.332 – 3.071       | 0.451             | 0.392 – 0.497       | 0.944 | +    | 47             | 0.358            | 0.309 – 0.407       | 0.888 | G    | ✓                                    |  |
| semifossorial         | 7                      | 3.904  | 1.139 – 13.375      | 0.333             | 0.178 – 0.488       | 0.914 | B    | 6              | 0.349            | 0.180 – 0.518       | 0.921 | B    | ×                                    |  |
| semiaquatic           | 11                     | 5.026  | 1.558 – 16.210      | 0.290             | 0.153 – 0.427       | 0.779 | B    | 10             | 0.240            | 0.145 – 0.335       | 0.856 | B    | ×                                    |  |
| aquatic               | 8                      | 4.077  | 0.572 – 29.063      | 0.303             | 0.139 – 0.468       | 0.840 | B    | 7              | 0.298            | 0.123 – 0.473       | 0.830 | B    | ×                                    |  |

| SR17 – d <sub>su</sub> | traditional regression |              |                       |                   |                      |              |          | PIC regression |                  |                      |              |          |                                      |  |
|------------------------|------------------------|--------------|-----------------------|-------------------|----------------------|--------------|----------|----------------|------------------|----------------------|--------------|----------|--------------------------------------|--|
|                        | n                      | a            | 95% CI <sub>a</sub>   | b <sub>trad</sub> | 95% CI <sub>b</sub>  | R            | sim.     | n              | b <sub>PIC</sub> | 95% CI <sub>b</sub>  | R            | sim.     | b <sub>trad</sub> ≠ b <sub>PIC</sub> |  |
| <b>whole sample</b>    | 136                    | 0.263        | 0.223 – 0.320         | 0.369             | 0.348 – 0.387        | 0.948        | E        | 135            | 0.365            | 0.336 – 0.394        | 0.886        | E        | ×                                    |  |
| <b>fissipeds</b>       | 129                    | 0.257        | 0.216 – 0.312         | 0.372             | 0.350 – 0.392        | 0.936        | E        | 128            | 0.364            | 0.334 – 0.394        | 0.885        | E        | ×                                    |  |
| <b>Family</b>          |                        |              |                       |                   |                      |              |          |                |                  |                      |              |          |                                      |  |
| Canidae                | 16                     | 0.057        | 0.018 – 0.291         | 0.505             | 0.325 – 0.626        | 0.915        | B        | 15             | 0.433            | 0.308 – 0.558        | 0.865        | B        | ×                                    |  |
| Mustelidae             | 32                     | 0.320        | 0.231 – 0.442         | 0.345             | 0.304 – 0.386        | 0.947        | B        | 31             | 0.353            | 0.289 – 0.417        | 0.873        | B        | ×                                    |  |
| Procyonidae            | 7                      | 0.167        | 0.011 – 2.592         | 0.457             | 0.117 – 0.796        | 0.763        | B        | 6              | <i>0.456</i>     | <i>0.075 – 0.837</i> | <i>0.741</i> | <i>B</i> | n.s.                                 |  |
| Ursidae                | 7                      | <i>1.015</i> | <i>0.098 – 10.539</i> | <i>0.258</i>      | <i>0.059 – 0.457</i> | <i>0.741</i> | <i>B</i> | 6              | <i>0.246</i>     | <i>0.040 – 0.452</i> | <i>0.738</i> | <i>B</i> | n.s.                                 |  |
| Felidae                | 26                     | 0.309        | 0.210 – 0.455         | 0.358             | 0.317 – 0.399        | 0.963        | B        | 25             | 0.349            | 0.294 – 0.404        | 0.928        | B        | ×                                    |  |
| Herpestidae            | 12                     | 0.265        | 0.101 – 0.697         | 0.363             | 0.228 – 0.499        | 0.848        | B        | 11             | 0.357            | 0.215 – 0.499        | 0.831        | B        | ×                                    |  |
| Eupleridae             | 5                      | 0.184        | 0.056 – 0.603         | 0.423             | 0.259 – 0.586        | 0.978        | B        |                |                  |                      |              |          |                                      |  |
| Viverridae             | 14                     | 0.374        | 0.142 – 0.985         | 0.330             | 0.210 – 0.450        | 0.815        | B        | 13             | <i>0.365</i>     | <i>0.168 – 0.562</i> | <i>0.527</i> | <i>B</i> | n.s.                                 |  |
| <b>Locomotor type</b>  |                        |              |                       |                   |                      |              |          |                |                  |                      |              |          |                                      |  |
| arboreal               | 7                      | 0.192        | 0.048 – 0.770         | 0.427             | 0.254 – 0.599        | 0.936        | B        | 6              | 0.435            | 0.242 – 0.628        | 0.934        | B        | ×                                    |  |
| semiarboreal           | 10                     | 0.555        | 0.320 – 0.964         | 0.295             | 0.223 – 0.367        | 0.954        | G        | 9              | 0.275            | 0.173 – 0.377        | 0.896        | B        | ×                                    |  |
| scansorial             | 45                     | 0.266        | 0.198 – 0.357         | 0.376             | 0.344 – 0.408        | 0.961        | E        | 44             | 0.366            | 0.315 – 0.417        | 0.891        | B        | ×                                    |  |
| terrestrial            | 48                     | 0.298        | 0.226 – 0.407         | 0.338             | 0.304 – 0.372        | 0.931        | G        | 47             | 0.359            | 0.304 – 0.414        | 0.857        | B        | ×                                    |  |
| semifossorial          | 7                      | 0.258        | 0.127 – 0.524         | 0.379             | 0.290 – 0.468        | 0.979        | B        | 6              | 0.382            | 0.266 – 0.498        | 0.970        | B        | ×                                    |  |
| semiaquatic            | 11                     | 0.319        | 0.166 – 0.614         | 0.344             | 0.267 – 0.420        | 0.955        | B        | 10             | 0.345            | 0.236 – 0.454        | 0.912        | B        | ×                                    |  |
| aquatic                | 8                      | 0.115        | 0.007 – 1.916         | 0.434             | 0.198 – 0.670        | 0.839        | B        | 7              | <i>0.462</i>     | <i>0.143 – 0.781</i> | <i>0.753</i> | <i>B</i> | n.s.                                 |  |

| SR18 – d <sub>tu</sub> | traditional regression |       |                     |                   |                     |       |      | PIC regression |                  |                      |              |          |                                      |  |
|------------------------|------------------------|-------|---------------------|-------------------|---------------------|-------|------|----------------|------------------|----------------------|--------------|----------|--------------------------------------|--|
|                        | n                      | a     | 95% CI <sub>a</sub> | b <sub>trad</sub> | 95% CI <sub>b</sub> | R     | sim. | n              | b <sub>PIC</sub> | 95% CI <sub>b</sub>  | R            | sim.     | b <sub>trad</sub> ≠ b <sub>PIC</sub> |  |
| <b>whole sample</b>    | 136                    | 0.199 | 0.169 – 0.238       | 0.370             | 0.351 – 0.389       | 0.958 | E    | 135            | 0.374            | 0.346 – 0.402        | 0.897        | E        | ×                                    |  |
| <b>fissipeds</b>       | 129                    | 0.182 | 0.152 – 0.215       | 0.382             | 0.363 – 0.403       | 0.951 | E    | 128            | 0.482            | 0.427 – 0.537        | 0.760        | +        | ✓                                    |  |
| <b>Family</b>          |                        |       |                     |                   |                     |       |      |                |                  |                      |              |          |                                      |  |
| Canidae                | 16                     | 0.150 | 0.055 – 0.518       | 0.410             | 0.274 – 0.518       | 0.904 | B    | 15             | 0.411            | 0.290 – 0.532        | 0.861        | B        | ×                                    |  |
| Mustelidae             | 32                     | 0.247 | 0.166 – 0.367       | 0.334             | 0.283 – 0.384       | 0.914 | B    | 31             | 0.368            | 0.294 – 0.442        | 0.844        | B        | ×                                    |  |
| Procyonidae            | 7                      | 0.435 | 0.122 – 1.557       | 0.270             | 0.112 – 0.427       | 0.861 | B    | 6              | <i>0.281</i>     | <i>0.090 – 0.472</i> | <i>0.837</i> | <i>B</i> | n.s.                                 |  |
| Ursidae                | 7                      | 0.173 | 0.010 – 3.127       | 0.395             | 0.148 – 0.641       | 0.839 | B    | 6              | <i>0.409</i>     | <i>0.138 – 0.680</i> | <i>0.845</i> | <i>B</i> | n.s.                                 |  |
| Felidae                | 26                     | 0.119 | 0.068 – 0.208       | 0.419             | 0.360 – 0.479       | 0.942 | E    | 25             | 0.388            | 0.314 – 0.462        | 0.892        | B        | ×                                    |  |
| Herpestidae            | 12                     | 0.233 | 0.096 – 0.569       | 0.370             | 0.245 – 0.495       | 0.877 | B    | 11             | 0.367            | 0.246 – 0.488        | 0.887        | B        | ×                                    |  |
| Eupleridae             | 5                      | 0.225 | 0.154 – 0.328       | 0.363             | 0.310 – 0.415       | 0.997 | B    |                |                  |                      |              |          |                                      |  |
| Viverridae             | 14                     | 0.323 | 0.166 – 0.629       | 0.320             | 0.237 – 0.402       | 0.912 | B    | 13             | 0.282            | 0.152 – 0.412        | 0.689        | B        | ×                                    |  |
| <b>Locomotor type</b>  |                        |       |                     |                   |                     |       |      |                |                  |                      |              |          |                                      |  |
| arboreal               | 7                      | 0.250 | 0.068 – 0.914       | 0.342             | 0.181 – 0.502       | 0.913 | B    | 6              | 0.222            | 0.219 – 0.225        | 1.000        | –        | ×                                    |  |
| semiarboreal           | 10                     | 0.353 | 0.194 – 0.644       | 0.310             | 0.232 – 0.388       | 0.951 | B    | 9              | 0.287            | 0.182 – 0.392        | 0.900        | B        | ×                                    |  |
| scansorial             | 45                     | 0.139 | 0.101 – 0.191       | 0.408             | 0.374 – 0.442       | 0.961 | E    | 44             | 0.409            | 0.352 – 0.466        | 0.893        | E        | ×                                    |  |
| terrestrial            | 48                     | 0.186 | 0.148 – 0.242       | 0.386             | 0.357 – 0.412       | 0.964 | E    | 47             | 0.375            | 0.329 – 0.421        | 0.909        | B        | ×                                    |  |
| semifossorial          | 7                      | 0.106 | 0.053 – 0.524       | 0.374             | 0.230 – 0.518       | 0.942 | B    | 6              | 0.377            | 0.225 – 0.529        | 0.945        | B        | ×                                    |  |
| semiaquatic            | 11                     | 0.325 | 0.105 – 1.007       | 0.307             | 0.174 – 0.439       | 0.820 | B    | 10             | 0.480            | 0.213 – 0.747        | 0.691        | B        | ×                                    |  |
| aquatic                | 8                      | 0.033 | 0.006 – 0.181       | 0.503             | 0.361 – 0.645       | 0.959 | E    | 7              | 0.479            | 0.336 – 0.622        | 0.959        | E        | ×                                    |  |

| SR19 – O              | traditional regression |          |                            |                          |                            |       |      | PIC regression |                         |                            |              |          |                                                    |  |
|-----------------------|------------------------|----------|----------------------------|--------------------------|----------------------------|-------|------|----------------|-------------------------|----------------------------|--------------|----------|----------------------------------------------------|--|
|                       | n                      | <i>a</i> | 95% CI <sub><i>a</i></sub> | <i>b</i> <sub>trad</sub> | 95% CI <sub><i>b</i></sub> | R     | sim. | n              | <i>b</i> <sub>PIC</sub> | 95% CI <sub><i>b</i></sub> | R            | sim.     | <i>b</i> <sub>trad</sub> ≠ <i>b</i> <sub>PIC</sub> |  |
| whole sample          | 136                    | 0.721    | 0.633 – 0.831              | 0.368                    | 0.351 – 0.384              | 0.976 | +    | 135            | 0.369                   | 0.349 – 0.389              | 0.950        | +        | ×                                                  |  |
| fissipeds             | 129                    | 0.674    | 0.588 – 0.779              | 0.377                    | 0.359 – 0.393              | 0.974 | +    | 128            | 0.370                   | 0.350 – 0.390              | 0.949        | +        | ×                                                  |  |
| <b>Family</b>         |                        |          |                            |                          |                            |       |      |                |                         |                            |              |          |                                                    |  |
| Canidae               | 16                     | 0.425    | 0.263 – 0.902              | 0.436                    | 0.352 – 0.488              | 0.959 | +    | 15             | 0.378                   | 0.298 – 0.458              | 0.930        | G        | ×                                                  |  |
| Mustelidae            | 32                     | 0.641    | 0.486 – 0.846              | 0.372                    | 0.337 – 0.407              | 0.967 | +    | 31             | 0.369                   | 0.323 – 0.415              | 0.942        | G        | ×                                                  |  |
| Procyonidae           | 7                      | 0.543    | 0.068 – 4.328              | 0.400                    | 0.143 – 0.657              | 0.829 | B    | 6              | <b>0.409</b>            | <b>0.077 – 0.741</b>       | <b>0.756</b> | <b>B</b> | n.s.                                               |  |
| Ursidae               | 7                      | 1.978    | 0.319 – 12.275             | 0.269                    | 0.113 – 0.424              | 0.864 | B    | 6              | <b>0.276</b>            | <b>0.097 – 0.455</b>       | <b>0.853</b> | <b>B</b> | n.s.                                               |  |
| Felidae               | 26                     | 0.776    | 0.615 – 0.977              | 0.370                    | 0.345 – 0.394              | 0.987 | +    | 25             | 0.362                   | 0.327 – 0.397              | 0.974        | G        | ×                                                  |  |
| Herpestidae           | 12                     | 0.962    | 0.588 – 1.573              | 0.334                    | 0.265 – 0.403              | 0.956 | G    | 11             | 0.347                   | 0.288 – 0.406              | 0.971        | G        | ×                                                  |  |
| Eupleridae            | 5                      | 0.612    | 0.229 – 1.632              | 0.402                    | 0.267 – 0.537              | 0.983 | G    |                |                         |                            |              |          |                                                    |  |
| Viverridae            | 14                     | 0.626    | 0.350 – 1.122              | 0.384                    | 0.312 – 0.456              | 0.954 | G    | 13             | 0.405                   | 0.323 – 0.487              | 0.948        | G        | ×                                                  |  |
| <b>Locomotor type</b> |                        |          |                            |                          |                            |       |      |                |                         |                            |              |          |                                                    |  |
| arboreal              | 7                      | 0.402    | 0.093 – 1.735              | 0.440                    | 0.259 – 0.621              | 0.934 | B    | 6              | 0.377                   | 0.376 – 0.378              | 1.000        | +        | ×                                                  |  |
| semiarboreal          | 10                     | 0.560    | 0.311 – 1.008              | 0.401                    | 0.325 – 0.478              | 0.972 | G    | 9              | 0.378                   | 0.245 – 0.511              | 0.906        | B        | ×                                                  |  |
| scansorial            | 45                     | 0.789    | 0.633 – 0.983              | 0.360                    | 0.337 – 0.384              | 0.976 | +    | 44             | 0.358                   | 0.323 – 0.393              | 0.948        | G        | ×                                                  |  |
| terrestrial           | 48                     | 0.605    | 0.494 – 0.789              | 0.391                    | 0.358 – 0.417              | 0.975 | +    | 47             | 0.359                   | 0.327 – 0.391              | 0.953        | G        | ×                                                  |  |
| semifossorial         | 7                      | 0.596    | 0.316 – 1.124              | 0.400                    | 0.320 – 0.480              | 0.985 | G    | 6              | 0.423                   | 0.289 – 0.557              | 0.967        | G        | ×                                                  |  |
| semiaquatic           | 11                     | 0.640    | 0.281 – 1.459              | 0.375                    | 0.278 – 0.471              | 0.940 | G    | 10             | 0.419                   | 0.295 – 0.543              | 0.923        | G        | ×                                                  |  |
| aquatic               | 8                      | 0.186    | 0.012 – 2.791              | 0.469                    | 0.242 – 0.696              | 0.875 | B    | 7              | 0.458                   | 0.284 – 0.632              | 0.932        | G        | ×                                                  |  |

| SR20 – $\theta$       | traditional regression |       |                     |                       |                                              |       |      | PIC regression |                       |                                             |       |      |                                      |  |
|-----------------------|------------------------|-------|---------------------|-----------------------|----------------------------------------------|-------|------|----------------|-----------------------|---------------------------------------------|-------|------|--------------------------------------|--|
|                       | n                      | a     | 95% CI <sub>a</sub> | b <sub>trad</sub>     | 95% CI <sub>b</sub>                          | R     | sim. | n              | b <sub>PIC</sub>      | 95% CI <sub>b</sub>                         | R     | sim. | b <sub>trad</sub> ≠ b <sub>PIC</sub> |  |
| <b>whole sample</b>   | 136                    | 0.078 | 0.008 – 0.090       | $9.70 \cdot 10^{-7}$  | $4.60 \cdot 10^{-7} - 3.56 \cdot 10^{-7}$    | 0.048 | –    | 135            | $2.44 \cdot 10^{-6}$  | $2.02 \cdot 10^{-6} - 2.86 \cdot 10^{-6}$   | 0.047 | –    | n.s.                                 |  |
| <b>fissipeds</b>      | 129                    | 0.132 | 0.115 – 0.148       | $-1.52 \cdot 10^{-6}$ | $-2.06 \cdot 10^{-6} - -9.73 \cdot 10^{-10}$ | 0.100 | –    | 128            | $2.58 \cdot 10^{-6}$  | $2.13 \cdot 10^{-6} - 3.03 \cdot 10^{-6}$   | 0.018 | –    | n.s.                                 |  |
| <b>Family</b>         |                        |       |                     |                       |                                              |       |      |                |                       |                                             |       |      |                                      |  |
| Canidae               | 16                     | 0.019 | -0.059 – 0.042      | $3.63 \cdot 10^{-6}$  | $5.98 \cdot 10^{-7} - 1.22 \cdot 10^{-5}$    | 0.447 | –    | 15             | $3.63 \cdot 10^{-6}$  | $1.99 \cdot 10^{-6} - 5.27 \cdot 10^{-6}$   | 0.623 | –    | n.s.                                 |  |
| Mustelidae            | 32                     | 0.110 | -0.041 – 0.141      | $1.17 \cdot 10^{-5}$  | $-1.51 \cdot 10^{-7} - 3.71 \cdot 10^{-5}$   | 0.064 | –    | 31             | $-2.93 \cdot 10^{-5}$ | $-4.02 \cdot 10^{-5} - -1.84 \cdot 10^{-5}$ | 0.081 | –    | n.s.                                 |  |
| Procyonidae           | 7                      | 0.025 | -0.047 – 0.096      | $1.95 \cdot 10^{-5}$  | $7.02 \cdot 10^{-6} - 3.15 \cdot 10^{-5}$    | 0.689 | –    | 6              | $2.08 \cdot 10^{-5}$  | $-2.00 \cdot 10^{-8} - 4.16 \cdot 10^{-5}$  | 0.594 | –    | n.s.                                 |  |
| Ursidae               | 7                      | 0.033 | -0.020 – 0.085      | $2.52 \cdot 10^{-7}$  | $-2.84 \cdot 10^{-7} - 1.63 \cdot 10^{-6}$   | 0.241 | –    | 6              | $2.71 \cdot 10^{-7}$  | $-6.21 \cdot 10^{-8} - 6.04 \cdot 10^{-7}$  | 0.154 | –    | n.s.                                 |  |
| Felidae               | 26                     | 0.059 | -0.022 – 0.082      | $1.12 \cdot 10^{-6}$  | $-4.11 \cdot 10^{-7} - 4.92 \cdot 10^{-6}$   | 0.073 | –    | 25             | $-1.43 \cdot 10^{-6}$ | $-2.03 \cdot 10^{-6} - -8.26 \cdot 10^{-7}$ | 0.006 | –    | n.s.                                 |  |
| Herpestidae           | 12                     | 0.027 | -0.020 – 0.071      | $4.82 \cdot 10^{-5}$  | $6.09 \cdot 10^{-6} - 6.51 \cdot 10^{-5}$    | 0.588 | –    | 11             | $5.04 \cdot 10^{-5}$  | $1.92 \cdot 10^{-5} - 8.16 \cdot 10^{-5}$   | 0.497 | –    | n.s.                                 |  |
| Eupleridae            | 5                      | 0.085 | 0.018 – 0.152       | $2.40 \cdot 10^{-5}$  | $1.85 \cdot 10^{-4} - 1.28 \cdot 10^{-4}$    | 0.866 | –    |                |                       |                                             |       |      |                                      |  |
| Viverridae            | 14                     | 0.113 | 0.090 – 0.179       | $-7.14 \cdot 10^{-6}$ | $-2.80 \cdot 10^{-5} - -3.26 \cdot 10^{-6}$  | 0.428 | –    | 13             | $-5.48 \cdot 10^{-5}$ | $-8.94 \cdot 10^{-5} - -2.02 \cdot 10^{-5}$ | 0.134 | –    | n.s.                                 |  |
| <b>Locomotor type</b> |                        |       |                     |                       |                                              |       |      |                |                       |                                             |       |      |                                      |  |
| arboreal              | 7                      | 0.095 | 0.004 – 0.260       | $-7.49 \cdot 10^{-6}$ | $-6.38 \cdot 10^{-5} - 2.51 \cdot 10^{-5}$   | 0.462 | –    | 6              | $-7.17 \cdot 10^{-6}$ | $-7.76 \cdot 10^{-6} - -6.58 \cdot 10^{-6}$ | 0.998 | –    | n.s.                                 |  |
| semiarboreal          | 10                     | 0.202 | 0.108 – 0.378       | $-2.22 \cdot 10^{-5}$ | $-9.98 \cdot 10^{-5} - 3.73 \cdot 10^{-5}$   | 0.168 | –    | 9              | $-1.74 \cdot 10^{-5}$ | $-3.18 \cdot 10^{-5} - -3.00 \cdot 10^{-6}$ | 0.131 | –    | n.s.                                 |  |
| scansorial            | 45                     | 0.135 | 0.112 – 0.196       | $-1.04 \cdot 10^{-6}$ | $-2.87 \cdot 10^{-6} - -2.12 \cdot 10^{-7}$  | 0.180 | –    | 44             | $-1.33 \cdot 10^{-6}$ | $-1.74 \cdot 10^{-6} - -9.20 \cdot 10^{-7}$ | 0.038 | –    | n.s.                                 |  |
| terrestrial           | 48                     | 0.111 | 0.060 – 0.167       | $-1.45 \cdot 10^{-6}$ | $-3.93 \cdot 10^{-6} - 6.65 \cdot 10^{-6}$   | 0.052 | –    | 47             | $1.50 \cdot 10^{-5}$  | $-2.87 \cdot 10^{-5} - 5.87 \cdot 10^{-5}$  | 0.193 | –    | n.s.                                 |  |
| semifossorial         | 7                      | 0.047 | -0.013 – 0.088      | $1.75 \cdot 10^{-5}$  | $1.11 \cdot 10^{-5} - 2.56 \cdot 10^{-5}$    | 0.885 | –    | 6              | $1.68 \cdot 10^{-5}$  | $3.50 \cdot 10^{-6} - 3.01 \cdot 10^{-5}$   | 0.772 | –    | n.s.                                 |  |
| semiaquatic           | 11                     | 0.106 | -0.064 – 0.160      | $8.20 \cdot 10^{-6}$  | $-4.47 \cdot 10^{-6} - 3.40 \cdot 10^{-5}$   | 0.070 | –    | 10             | $-1.63 \cdot 10^{-5}$ | $-2.82 \cdot 10^{-5} - -4.45 \cdot 10^{-6}$ | 0.315 | –    | n.s.                                 |  |
| aquatic               | 8                      | 0.035 | -0.318 – 0.215      | $5.07 \cdot 10^{-7}$  | $-7.40 \cdot 10^{-7} - 2.50 \cdot 10^{-6}$   | 0.314 | –    | 7              | $5.75 \cdot 10^{-7}$  | $1.28 \cdot 10^{-7} - 1.02 \cdot 10^{-6}$   | 0.673 | –    | n.s.                                 |  |

| SR21 – $\alpha$       | traditional regression |          |                            |                          |                            |       |      | PIC regression |                         |                            |       |      |                                                    |
|-----------------------|------------------------|----------|----------------------------|--------------------------|----------------------------|-------|------|----------------|-------------------------|----------------------------|-------|------|----------------------------------------------------|
|                       | n                      | <i>a</i> | 95% CI <sub><i>a</i></sub> | <i>b</i> <sub>trad</sub> | 95% CI <sub><i>b</i></sub> | R     | sim. | n              | <i>b</i> <sub>PIC</sub> | 95% CI <sub><i>b</i></sub> | R     | sim. | <i>b</i> <sub>trad</sub> ≠ <i>b</i> <sub>PIC</sub> |
| <b>whole sample</b>   | 136                    | 0.020    | 0.012 – 0.035              | 0.314                    | 0.253 – 0.366              | 0.589 | G    | 135            | 0.388                   | 0.329 – 0.447              | 0.451 | G    | ✓                                                  |
| <b>fissipeds</b>      | 129                    | 0.017    | 0.010 – 0.033              | 0.334                    | 0.257 – 0.395              | 0.535 | G    | 128            | 0.398                   | 0.336 – 0.460              | 0.450 | +    | ✓                                                  |
| <b>Family</b>         |                        |          |                            |                          |                            |       |      |                |                         |                            |       |      |                                                    |
| Canidae               | 16                     | 0.033    | 0.009 – 0.284              | 0.301                    | 0.060 – 0.450              | 0.523 | B    | 15             | 0.323                   | 0.150 – 0.496              | 0.376 | B    | n.s.                                               |
| Mustelidae            | 32                     | 0.023    | 0.009 – 0.059              | 0.333                    | 0.211 – 0.455              | 0.180 | B    | 31             | 0.417                   | 0.265 – 0.569              | 0.214 | G    | n.s.                                               |
| Procyonidae           | 7                      | 0.002    | 0.000 – 0.041              | 0.597                    | 0.190 – 1.003              | 0.806 | B    | 6              | 0.547                   | 0.131 – 0.963              | 0.791 | B    | n.s.                                               |
| Ursidae               | 7                      | 0.005    | 0.000 – 0.974              | 0.385                    | -0.058 – 0.828             | 0.003 | B    | 6              | 0.393                   | -0.095 – 0.881             | 0.022 | B    | n.s.                                               |
| Felidae               | 26                     | 0.016    | 0.008 – 0.031              | 0.309                    | 0.235 – 0.383              | 0.822 | B    | 25             | 0.369                   | 0.269 – 0.469              | 0.766 | G    | ×                                                  |
| Herpestidae           | 12                     | 0.008    | 0.001 – 0.061              | 0.476                    | 0.186 – 0.766              | 0.500 | B    | 11             | 0.444                   | 0.169 – 0.719              | 0.499 | B    | n.s.                                               |
| Eupleridae            | 5                      | 0.019    | 0.001 – 0.470              | 0.346                    | -0.095 – 0.788             | 0.720 | B    |                |                         |                            |       |      |                                                    |
| Viverridae            | 14                     | 0.003    | 0.000 – 0.025              | 0.490                    | 0.241 – 0.739              | 0.588 | B    | 13             | 0.484                   | 0.188 – 0.780              | 0.266 | B    | n.s.                                               |
| <b>Locomotor type</b> |                        |          |                            |                          |                            |       |      |                |                         |                            |       |      |                                                    |
| arboreal              | 7                      | 0.003    | 0.000 – 0.222              | 0.475                    | -0.062 – 1.012             | 0.178 | B    | 6              | 0.475                   | -0.108 – 1.058             | 0.148 | B    | n.s.                                               |
| semiarboreal          | 10                     | 0.005    | 0.000 – 0.079              | 0.474                    | 0.124 – 0.824              | 0.422 | B    | 9              | 0.429                   | 0.100 – 0.758              | 0.395 | B    | n.s.                                               |
| scansorial            | 45                     | 0.024    | 0.016 – 0.038              | 0.268                    | 0.221 – 0.314              | 0.822 | E    | 44             | 0.326                   | 0.252 – 0.400              | 0.674 | G    | ×                                                  |
| terrestrial           | 48                     | 0.023    | 0.007 – 0.104              | 0.334                    | 0.157 – 0.470              | 0.556 | B    | 47             | 0.404                   | 0.289 – 0.519              | 0.281 | G    | n.s.                                               |
| semifossorial         | 7                      | 0.010    | 0.000 – 0.332              | 0.405                    | -0.032 – 0.842             | 0.347 | B    | 6              | 0.397                   | -0.088 – 0.882             | 0.185 | B    | n.s.                                               |
| semiaquatic           | 11                     | 0.013    | 0.002 – 0.100              | 0.363                    | 0.128 – 0.599              | 0.513 | B    | 10             | 0.468                   | 0.141 – 0.795              | 0.414 | B    | n.s.                                               |
| aquatic               | 8                      | 0.002    | 0.000 – 0.506              | 0.497                    | 0.011 – 0.984              | 0.203 | B    | 7              | 0.437                   | -0.022 – 0.896             | 0.000 | B    | n.s.                                               |

| SR22 – UR             | traditional regression |          |                              |                          |                            |       |          | PIC regression |                         |                            |       |          |                                                    |
|-----------------------|------------------------|----------|------------------------------|--------------------------|----------------------------|-------|----------|----------------|-------------------------|----------------------------|-------|----------|----------------------------------------------------|
|                       | n                      | <i>a</i> | 95% CI <sub><i>a</i></sub>   | <i>b</i> <sub>trad</sub> | 95% CI <sub><i>b</i></sub> | R     | sim.     | n              | <i>b</i> <sub>PIC</sub> | 95% CI <sub><i>b</i></sub> | R     | sim.     | <i>b</i> <sub>trad</sub> ≠ <i>b</i> <sub>PIC</sub> |
| <b>whole sample</b>   | 136                    | 0.014    | $4.28 \cdot 10^{-4} - 0.019$ | 0.198                    | 0.166 – 0.605              | 0.141 | +        | 135            | 0.188                   | 0.156 – 0.220              | 0.142 | +        | n.s.                                               |
| <b>fissipeds</b>      | 129                    | 0.408    | 0.300 – 15.740               | -0.389                   | -0.634 – -0.166            | 0.067 | -        | 128            | 0.188                   | 0.155 – 0.221              | 0.083 | +        | n.s.                                               |
| <b>Family</b>         |                        |          |                              |                          |                            |       |          |                |                         |                            |       |          |                                                    |
| Canidae               | 16                     | 0.003    | $3.17 \cdot 10^{-6} - 0.019$ | 0.302                    | 0.077 – 1.045              | 0.212 | <i>E</i> | 15             | -0.380                  | -0.597 – -0.163            | 0.167 | -        | n.s.                                               |
| Mustelidae            | 32                     | 0.032    | 0.004 – 0.052                | 0.139                    | 0.084 – 0.407              | 0.272 | <i>E</i> | 31             | 0.143                   | 0.090 – 0.196              | 0.175 | <i>E</i> | n.s.                                               |
| Procyonidae           | 7                      | 0.005    | $1.06 \cdot 10^{-8} - 0.026$ | 0.358                    | 0.159 – 1.907              | 0.199 | +        | 6              | 0.340                   | -0.074 – 0.754             | 0.201 | <i>B</i> | n.s.                                               |
| Ursidae               | 7                      | 0.742    | 0.051 – 273.527              | -0.181                   | -0.688 – 0.062             | 0.397 | <i>G</i> | 6              | -0.179                  | -0.377 – 0.019             | 0.457 | <i>B</i> | n.s.                                               |
| Felidae               | 26                     | 0.015    | 0.009 – 0.024                | 0.162                    | 0.108 – 0.216              | 0.458 | <i>E</i> | 25             | 0.198                   | 0.115 – 0.281              | 0.154 | <i>E</i> | n.s.                                               |
| Herpestidae           | 12                     | 0.403    | 0.123 – 41.976               | -0.243                   | -0.889 – -0.073            | 0.067 | -        | 11             | -0.234                  | -0.401 – -0.067            | 0.043 | -        | n.s.                                               |
| Eupleridae            | 5                      | 0.012    | $4.22 \cdot 10^{-5} - 0.055$ | 0.238                    | -0.008 – 1.038             | 0.693 | <i>B</i> |                |                         |                            |       |          |                                                    |
| Viverridae            | 14                     | 0.024    | 0.002 – 0.043                | 0.143                    | 0.068 – 0.484              | 0.229 | <i>E</i> | 13             | 0.130                   | 0.054 – 0.206              | 0.405 | <i>E</i> | n.s.                                               |
| <b>Locomotor type</b> |                        |          |                              |                          |                            |       |          |                |                         |                            |       |          |                                                    |
| arboreal              | 7                      | 0.018    | $1.75 \cdot 10^{-5} - 0.037$ | 0.194                    | 0.110 – 1.069              | 0.319 | <i>E</i> | 6              | 0.179                   | 0.157 – 0.201              | 0.995 | +        | n.s.                                               |
| semiarboreal          | 10                     | 0.034    | 0.003 – 0.052                | 0.109                    | 0.044 – 0.418              | 0.312 | <i>E</i> | 9              | 0.106                   | 0.033 – 0.179              | 0.578 | <i>E</i> | n.s.                                               |
| scansorial            | 45                     | 0.018    | 0.013 – 0.027                | 0.149                    | 0.105 – 0.186              | 0.361 | <i>E</i> | 44             | 0.280                   | 0.194 – 0.366              | 0.082 | +        | n.s.                                               |
| terrestrial           | 48                     | 0.416    | 0.232 – 0.623                | -0.233                   | -0.289 – -0.156            | 0.477 | -        | 47             | -0.189                  | -0.245 – -0.133            | 0.050 | -        | n.s.                                               |
| semifossorial         | 7                      | 0.028    | 0.003 – 0.066                | 0.156                    | 0.053 – 0.433              | 0.431 | <i>E</i> | 6              | 0.132                   | -0.029 – 0.293             | 0.175 | <i>B</i> | n.s.                                               |
| semiaquatic           | 11                     | 0.019    | 0.006 – 0.098                | 0.199                    | 0.014 – 0.317              | 0.516 | <i>E</i> | 10             | 0.113                   | 0.056 – 0.170              | 0.754 | <i>E</i> | n.s.                                               |
| aquatic               | 8                      | 0.013    | $2.70 \cdot 10^{-5} - 0.313$ | 0.197                    | -0.076 – 0.700             | 0.552 | <i>B</i> | 7              | 0.233                   | 0.011 – 0.455              | 0.424 | <i>E</i> | n.s.                                               |



| SR23 – IFA            | traditional regression |              |                              |                          |                            |              |          | PIC regression |                         |                            |       |          |                                                    |  |
|-----------------------|------------------------|--------------|------------------------------|--------------------------|----------------------------|--------------|----------|----------------|-------------------------|----------------------------|-------|----------|----------------------------------------------------|--|
|                       | n                      | <i>a</i>     | 95% CI <sub><i>a</i></sub>   | <i>b</i> <sub>trad</sub> | 95% CI <sub><i>b</i></sub> | R            | sim.     | n              | <i>b</i> <sub>PIC</sub> | 95% CI <sub><i>b</i></sub> | R     | sim.     | <i>b</i> <sub>trad</sub> ≠ <i>b</i> <sub>PIC</sub> |  |
| <b>whole sample</b>   | 136                    | 0.062        | 0.053 – 0.075                | 0.138                    | 0.117 – 0.156              | 0.275        | +        | 135            | 0.161                   | 0.135 – 0.187              | 0.332 | +        | ×                                                  |  |
| <b>fissipeds</b>      | <i>129</i>             | <i>0.064</i> | <i>0.006 – 0.079</i>         | <i>0.134</i>             | <i>0.109 – 0.418</i>       | <i>0.041</i> | +        | 128            | 0.161                   | 0.134 – 0.188              | 0.278 | +        | n.s.                                               |  |
| <b>Family</b>         |                        |              |                              |                          |                            |              |          |                |                         |                            |       |          |                                                    |  |
| Canidae               | 16                     | 0.020        | $5.22 \cdot 10^{-5} - 0.040$ | 0.239                    | 0.149 – 0.893              | 0.079        | +        | 15             | -0.285                  | -0.449 – -0.121            | 0.072 | –        | n.s.                                               |  |
| Mustelidae            | 32                     | 0.070        | 0.049 – 0.109                | 0.155                    | 0.103 – 0.198              | 0.456        | +        | 31             | 0.149                   | 0.099 – 0.199              | 0.441 | +        | ×                                                  |  |
| Procyonidae           | 7                      | 0.025        | $3.36 \cdot 10^{-6} - 0.374$ | 0.249                    | -0.064 – 1.310             | 0.216        | <i>B</i> | 6              | 0.249                   | -0.054 – 0.552             | 0.197 | <i>B</i> | n.s.                                               |  |
| Ursidae               | 7                      | 1.246        | 0.007 – 119.95               | -0.157                   | -0.540 – 0.292             | 0.180        | <i>B</i> | 6              | 0.434                   | 0.008 – 0.860              | 0.614 | +        | n.s.                                               |  |
| Felidae               | 26                     | 0.055        | 0.043 – 0.073                | 0.130                    | 0.099 – 0.154              | 0.726        | +        | 25             | 0.127                   | 0.080 – 0.174              | 0.463 | +        | ×                                                  |  |
| Herpestidae           | 12                     | 0.838        | 0.566 – 35.400               | -0.194                   | -0.724 – -0.138            | 0.021        | –        | 11             | 0.177                   | 0.053 – 0.301              | 0.209 | +        | n.s.                                               |  |
| Eupleridae            | 5                      | 0.059        | 0.011 – 0.212                | 0.158                    | -0.038 – 0.400             | 0.919        | <i>B</i> |                |                         |                            |       |          |                                                    |  |
| Viverridae            | 14                     | 0.046        | 0.026 – 0.089                | 0.179                    | 0.088 – 0.251              | 0.731        | +        | 13             | 0.180                   | 0.085 – 0.275              | 0.565 | +        | ×                                                  |  |
| <b>Locomotor type</b> |                        |              |                              |                          |                            |              |          |                |                         |                            |       |          |                                                    |  |
| arboreal              | 7                      | 0.037        | $3.77 \cdot 10^{-5} - 0.264$ | 0.206                    | -0.052 – 1.067             | 0.350        | <i>B</i> | 6              | -0.056                  | -0.066 – -0.046            | 0.990 | –        | n.s.                                               |  |
| semiarboreal          | 10                     | 0.049        | 0.030 – 0.091                | 0.168                    | 0.080 – 0.231              | 0.849        | +        | 9              | 0.184                   | 0.092 – 0.276              | 0.802 | +        | ×                                                  |  |
| scansorial            | 45                     | 0.078        | 0.066 – 0.097                | 0.094                    | 0.072 – 0.113              | 0.479        | +        | 44             | 0.183                   | 0.128 – 0.238              | 0.241 | +        | n.s.                                               |  |
| terrestrial           | 48                     | 0.535        | 0.379 – 0.686                | -0.123                   | -0.155 – -0.079            | 0.355        | –        | 47             | 0.155                   | 0.109 – 0.201              | 0.156 | +        | n.s.                                               |  |
| semifossorial         | 7                      | 0.074        | 0.015 – 0.170                | 0.158                    | 0.052 – 0.358              | 0.562        | +        | 6              | 0.161                   | -0.016 – 0.338             | 0.471 | <i>B</i> | n.s.                                               |  |
| semiaquatic           | 11                     | 0.053        | 0.024 – 0.213                | 0.189                    | 0.034 – 0.275              | 0.673        | +        | 10             | 0.249                   | 0.114 – 0.384              | 0.707 | +        | ×                                                  |  |
| aquatic               | 8                      | 0.027        | $1.72 \cdot 10^{-4} - 0.062$ | 0.210                    | 0.134 – 0.622              | 0.737        | +        | 7              | 0.207                   | 0.073 – 0.341              | 0.785 | +        | ×                                                  |  |

| SR24 – L <sub>m</sub> | traditional regression |              |                            |                          |                            |              |          | PIC regression |                         |                            |              |          |                                                    |  |
|-----------------------|------------------------|--------------|----------------------------|--------------------------|----------------------------|--------------|----------|----------------|-------------------------|----------------------------|--------------|----------|----------------------------------------------------|--|
|                       | n                      | <i>a</i>     | 95% CI <sub><i>a</i></sub> | <i>b</i> <sub>trad</sub> | 95% CI <sub><i>b</i></sub> | R            | sim.     | n              | <i>b</i> <sub>PIC</sub> | 95% CI <sub><i>b</i></sub> | R            | sim.     | <i>b</i> <sub>trad</sub> ≠ <i>b</i> <sub>PIC</sub> |  |
| <b>whole sample</b>   | 136                    | 1.498        | 1.174 – 1.972              | 0.351                    | 0.315 – 0.380              | 0.873        | G        | 135            | 0.347                   | 0.319 – 0.375              | 0.885        | G        | ×                                                  |  |
| <b>fissipeds</b>      | 129                    | 1.171        | 0.907 – 1.567              | 0.383                    | 0.347 – 0.415              | 0.884        | +        | 128            | 0.348                   | 0.320 – 0.376              | 0.887        | G        | ×                                                  |  |
| <b>Family</b>         |                        |              |                            |                          |                            |              |          |                |                         |                            |              |          |                                                    |  |
| Canidae               | 16                     | 0.915        | 0.440 – 4.034              | 0.449                    | 0.285 – 0.532              | 0.926        | G        | 15             | 0.458                   | 0.344 – 0.572              | 0.902        | +        | ×                                                  |  |
| Mustelidae            | 32                     | 2.017        | 1.281 – 3.176              | 0.294                    | 0.236 – 0.352              | 0.849        | B        | 31             | 0.299                   | 0.240 – 0.358              | 0.847        | B        | ×                                                  |  |
| Procyonidae           | 7                      | 2.983        | 0.809 – 10.995             | 0.251                    | 0.089 – 0.412              | 0.828        | B        | 6              | 0.225                   | 0.095 – 0.355              | 0.883        | B        | ×                                                  |  |
| Ursidae               | 7                      | 0.998        | 0.156 – 6.389              | 0.351                    | 0.193 – 0.509              | 0.920        | B        | 6              | 0.345                   | 0.178 – 0.512              | 0.921        | B        | ×                                                  |  |
| Felidae               | 26                     | 2.709        | 1.964 – 3.738              | 0.310                    | 0.275 – 0.344              | 0.965        | G        | 25             | 0.336                   | 0.292 – 0.380              | 0.951        | G        | ×                                                  |  |
| Herpestidae           | 12                     | 1.369        | 0.721 – 2.599              | 0.373                    | 0.283 – 0.463              | 0.940        | G        | 11             | 0.354                   | 0.263 – 0.445              | 0.934        | G        | ×                                                  |  |
| Eupleridae            | 5                      | 4.309        | 1.684 – 11.025             | 0.217                    | 0.088 – 0.346              | 0.946        | B        |                |                         |                            |              |          |                                                    |  |
| Viverridae            | 14                     | 1.429        | 0.695 – 2.939              | 0.343                    | 0.254 – 0.433              | 0.911        | G        | 13             | 0.336                   | 0.212 – 0.460              | 0.815        | B        | ×                                                  |  |
| <b>Locomotor type</b> |                        |              |                            |                          |                            |              |          |                |                         |                            |              |          |                                                    |  |
| arboreal              | 7                      | <i>1.114</i> | <i>0.093 – 13.348</i>      | <i>0.369</i>             | <i>0.062 – 0.677</i>       | <i>0.689</i> | <i>B</i> | 6              | <i>0.379</i>            | <i>0.049 – 0.709</i>       | <i>0.714</i> | <i>B</i> | n.s.                                               |  |
| semiarboreal          | 10                     | 2.040        | 0.656 – 6.344              | 0.315                    | 0.167 – 0.462              | 0.818        | B        | 9              | 0.276                   | 0.146 – 0.406              | 0.826        | B        | ×                                                  |  |
| scansorial            | 45                     | 2.240        | 1.535 – 3.268              | 0.314                    | 0.273 – 0.354              | 0.905        | G        | 44             | 0.318                   | 0.282 – 0.354              | 0.929        | G        | ×                                                  |  |
| terrestrial           | 48                     | 0.788        | 0.507 – 1.360              | 0.497                    | 0.377 – 0.505              | 0.934        | +        | 47             | 0.355                   | 0.310 – 0.400              | 0.904        | G        | ✓                                                  |  |
| semifossorial         | 7                      | 1.646        | 0.455 – 5.947              | 0.301                    | 0.140 – 0.463              | 0.884        | B        | 6              | 0.307                   | 0.143 – 0.471              | 0.903        | B        | ×                                                  |  |
| semiaquatic           | 11                     | 2.832        | 1.128 – 7.113              | 0.257                    | 0.149 – 0.365              | 0.831        | B        | 10             | 0.281                   | 0.166 – 0.396              | 0.847        | B        | ×                                                  |  |
| aquatic               | 8                      | 0.153        | 0.029 – 0.813              | 0.491                    | 0.352 – 0.631              | 0.959        | +        | 7              | 0.471                   | 0.286 – 0.656              | 0.927        | G        | ×                                                  |  |

| SR25 – d <sub>sm</sub> | traditional regression |       |                     |                   |                     |       |      | PIC regression |                  |                      |              |          |                                      |  |
|------------------------|------------------------|-------|---------------------|-------------------|---------------------|-------|------|----------------|------------------|----------------------|--------------|----------|--------------------------------------|--|
|                        | n                      | a     | 95% CI <sub>a</sub> | b <sub>trad</sub> | 95% CI <sub>b</sub> | R     | sim. | n              | b <sub>PIC</sub> | 95% CI <sub>b</sub>  | R            | sim.     | b <sub>trad</sub> ≠ b <sub>PIC</sub> |  |
| <b>whole sample</b>    | 136                    | 0.192 | 0.167 – 0.225       | 0.337             | 0.320 – 0.352       | 0.963 | G    | 135            | 0.337            | 0.313 – 0.361        | 0.907        | G        | ×                                    |  |
| <b>fissipeds</b>       | 129                    | 0.178 | 0.153 – 0.214       | 0.346             | 0.326 – 0.363       | 0.957 | G    | 128            | 0.335            | 0.310 – 0.360        | 0.909        | G        | ×                                    |  |
| <b>Family</b>          |                        |       |                     |                   |                     |       |      |                |                  |                      |              |          |                                      |  |
| Canidae                | 16                     | 0.051 | 0.021 – 0.126       | 0.492             | 0.385 – 0.588       | 0.939 | +    | 15             | 0.433            | 0.335 – 0.531        | 0.920        | E        | ×                                    |  |
| Mustelidae             | 32                     | 0.212 | 0.152 – 0.294       | 0.320             | 0.278 – 0.362       | 0.937 | G    | 31             | 0.311            | 0.259 – 0.363        | 0.894        | G        | ×                                    |  |
| Procyonidae            | 7                      | 0.183 | 0.025 – 1.354       | 0.336             | 0.088 – 0.583       | 0.767 | B    | 6              | <b>0.316</b>     | <b>0.057 – 0.575</b> | <b>0.751</b> | <b>B</b> | n.s.                                 |  |
| Ursidae                | 7                      | 0.884 | 0.307 – 2.549       | 0.197             | 0.107 – 0.287       | 0.918 | –    | 6              | 0.176            | 0.086 – 0.266        | 0.912        | –        | ×                                    |  |
| Felidae                | 26                     | 0.209 | 0.171 – 0.257       | 0.336             | 0.314 – 0.358       | 0.988 | G    | 25             | 0.323            | 0.291 – 0.355        | 0.971        | G        | ×                                    |  |
| Herpestidae            | 12                     | 0.328 | 0.174 – 0.618       | 0.281             | 0.192 – 0.370       | 0.893 | G    | 11             | 0.281            | 0.193 – 0.369        | 0.898        | G        | ×                                    |  |
| Eupleridae             | 5                      | 0.084 | 0.016 – 0.430       | 0.429             | 0.203 – 0.654       | 0.958 | B    |                |                  |                      |              |          |                                      |  |
| Viverridae             | 14                     | 0.197 | 0.092 – 0.420       | 0.326             | 0.232 – 0.420       | 0.889 | B    | 13             | 0.362            | 0.234 – 0.490        | 0.830        | B        | ×                                    |  |
| <b>Locomotor type</b>  |                        |       |                     |                   |                     |       |      |                |                  |                      |              |          |                                      |  |
| arboreal               | 7                      | 0.114 | 0.020 – 0.648       | 0.387             | 0.173 – 0.602       | 0.876 | B    | 6              | 0.383            | 0.155 – 0.611        | 0.878        | B        | ×                                    |  |
| semiarboreal           | 10                     | 0.174 | 0.075 – 0.405       | 0.352             | 0.242 – 0.462       | 0.924 | B    | 9              | 0.350            | 0.178 – 0.522        | 0.810        | B        | ×                                    |  |
| scansorial             | 45                     | 0.174 | 0.139 – 0.217       | 0.349             | 0.326 – 0.373       | 0.975 | G    | 44             | 0.335            | 0.299 – 0.371        | 0.937        | G        | ×                                    |  |
| terrestrial            | 48                     | 0.182 | 0.142 – 0.265       | 0.346             | 0.303 – 0.376       | 0.948 | B    | 47             | 0.324            | 0.283 – 0.365        | 0.902        | G        | ×                                    |  |
| semifossorial          | 7                      | 0.214 | 0.064 – 0.719       | 0.321             | 0.168 – 0.473       | 0.911 | B    | 6              | 0.325            | 0.160 – 0.490        | 0.912        | B        | ×                                    |  |
| semiaquatic            | 11                     | 0.160 | 0.068 – 0.378       | 0.359             | 0.259 – 0.460       | 0.929 | B    | 10             | 0.364            | 0.227 – 0.501        | 0.871        | B        | ×                                    |  |
| aquatic                | 8                      | 0.026 | 0.014 – 0.048       | 0.488             | 0.438 – 0.539       | 0.995 | +    | 7              | 0.489            | 0.437 – 0.541        | 0.995        | +        | ×                                    |  |

| SR26 – d <sub>tm</sub> | traditional regression |              |                      |                   |                      |              |          | PIC regression |                  |                      |              |          |                                      |  |
|------------------------|------------------------|--------------|----------------------|-------------------|----------------------|--------------|----------|----------------|------------------|----------------------|--------------|----------|--------------------------------------|--|
|                        | n                      | a            | 95% CI <sub>a</sub>  | b <sub>trad</sub> | 95% CI <sub>b</sub>  | R            | sim.     | n              | b <sub>PIC</sub> | 95% CI <sub>b</sub>  | R            | sim.     | b <sub>trad</sub> ≠ b <sub>PIC</sub> |  |
| <b>whole sample</b>    | 136                    | 0.200        | 0.176 – 0.232        | 0.339             | 0.321 – 0.354        | 0.964        | G        | 135            | 0.364            | 0.341 – 0.387        | 0.932        | E        | ✓                                    |  |
| <b>fissipeds</b>       | 129                    | 0.180        | 0.155 – 0.209        | 0.353             | 0.334 – 0.370        | 0.962        | nei.     | 128            | 0.362            | 0.338 – 0.386        | 0.930        | E        | ×                                    |  |
| <b>Family</b>          |                        |              |                      |                   |                      |              |          |                |                  |                      |              |          |                                      |  |
| Canidae                | 16                     | 0.091        | 0.051 – 0.346        | 0.436             | 0.295 – 0.496        | 0.919        | B        | 15             | 0.406            | 0.314 – 0.498        | 0.919        | B        | ×                                    |  |
| Mustelidae             | 32                     | 0.191        | 0.144 – 0.254        | 0.341             | 0.305 – 0.377        | 0.959        | B        | 31             | 0.375            | 0.326 – 0.424        | 0.937        | B        | ×                                    |  |
| Procyonidae            | 7                      | <i>0.471</i> | <i>0.115 – 1.927</i> | <i>0.223</i>      | <i>0.048 – 0.397</i> | <i>0.733</i> | <i>B</i> | 6              | <i>0.221</i>     | <i>0.022 – 0.420</i> | <i>0.687</i> | <i>B</i> | n.s.                                 |  |
| Ursidae                | 7                      | 0.593        | 0.205 – 1.714        | 0.236             | 0.146 – 0.327        | 0.943        | –        | 6              | 0.237            | 0.140 – 0.334        | 0.944        | G        | ×                                    |  |
| Felidae                | 26                     | 0.179        | 0.127 – 0.253        | 0.358             | 0.322 – 0.395        | 0.970        | B        | 25             | 0.364            | 0.318 – 0.410        | 0.953        | B        | ×                                    |  |
| Herpestidae            | 12                     | 0.347        | 0.191 – 0.629        | 0.280             | 0.197 – 0.364        | 0.906        | G        | 11             | 0.263            | 0.176 – 0.350        | 0.885        | G        | ×                                    |  |
| Eupleridae             | 5                      | 0.129        | 0.030 – 0.559        | 0.391             | 0.189 – 0.594        | 0.959        | B        |                |                  |                      |              |          |                                      |  |
| Viverridae             | 14                     | 0.217        | 0.120 – 0.395        | 0.318             | 0.244 – 0.391        | 0.929        | B        | 13             | 0.352            | 0.177 – 0.527        | 0.624        | B        | ×                                    |  |
| <b>Locomotor type</b>  |                        |              |                      |                   |                      |              |          |                |                  |                      |              |          |                                      |  |
| arboreal               | 7                      | 0.159        | 0.045 – 0.555        | 0.355             | 0.200 – 0.509        | 0.925        | B        | 6              | 0.360            | 0.199 – 0.521        | 0.876        | B        | ×                                    |  |
| semiarboreal           | 10                     | 0.156        | 0.075 – 0.323        | 0.371             | 0.276 – 0.466        | 0.949        | B        | 9              | 0.409            | 0.249 – 0.569        | 0.924        | B        | ×                                    |  |
| scansorial             | 45                     | 0.181        | 0.142 – 0.232        | 0.351             | 0.324 – 0.377        | 0.969        | B        | 44             | 0.369            | 0.328 – 0.410        | 0.975        | B        | ×                                    |  |
| terrestrial            | 48                     | 0.179        | 0.139 – 0.238        | 0.359             | 0.324 – 0.391        | 0.963        | B        | 47             | 0.355            | 0.317 – 0.393        | 0.948        | B        | ×                                    |  |
| semifossorial          | 7                      | 0.153        | 0.048 – 0.489        | 0.372             | 0.226 – 0.518        | 0.940        | B        | 6              | 0.375            | 0.210 – 0.540        | 0.911        | B        | ×                                    |  |
| semiaquatic            | 11                     | 0.206        | 0.076 – 0.557        | 0.327             | 0.210 – 0.444        | 0.881        | B        | 10             | 0.366            | 0.212 – 0.520        | 0.929        | B        | ×                                    |  |
| aquatic                | 8                      | 0.098        | 0.023 – 0.421        | 0.382             | 0.260 – 0.505        | 0.947        | B        | 7              | 0.382            | 0.259 – 0.505        | 0.995        | B        | ×                                    |  |

| SR27 – MR             | traditional regression |          |                              |                          |                            |       |          | PIC regression |                         |                              |       |          |                                                    |  |
|-----------------------|------------------------|----------|------------------------------|--------------------------|----------------------------|-------|----------|----------------|-------------------------|------------------------------|-------|----------|----------------------------------------------------|--|
|                       | n                      | <i>a</i> | 95% CI <sub><i>a</i></sub>   | <i>b</i> <sub>trad</sub> | 95% CI <sub><i>b</i></sub> | R     | sim.     | n              | <i>b</i> <sub>PIC</sub> | 95% CI <sub><i>b</i></sub>   | R     | sim.     | <i>b</i> <sub>trad</sub> ≠ <i>b</i> <sub>PIC</sub> |  |
| <b>whole sample</b>   | 136                    | 0.031    | 0.002 – 0.039                | 0.150                    | 0.127 – 0.459              | 0.122 | +        | 135            | 0.168                   | 0.139 – 0.197                | 0.043 | +        | n.s.                                               |  |
| <b>fissipeds</b>      | 129                    | 0.427    | 0.352 – 7.313                | -0.159                   | -0.494 – -0.133            | 0.050 | -        | 128            | 0.172                   | 0.142 – 0.202                | 0.004 | +        | n.s.                                               |  |
| <b>Family</b>         |                        |          |                              |                          |                            |       |          |                |                         |                              |       |          |                                                    |  |
| Canidae               | 16                     | 0.012    | $8.81 \cdot 10^{-5}$ – 0.028 | 0.219                    | 0.109 – 0.757              | 0.226 | <i>E</i> | 15             | -0.231                  | -0.364 – -0.098              | 0.039 | -        | n.s.                                               |  |
| Mustelidae            | 32                     | 0.038    | 0.022 – 0.065                | 0.157                    | 0.095 – 0.224              | 0.315 | <i>E</i> | 31             | 0.167                   | 0.105 – 0.229                | 0.139 | <i>E</i> | n.s.                                               |  |
| Procyonidae           | 7                      | 0.022    | $1.21 \cdot 10^{-4}$ – 0.057 | 0.214                    | 0.093 – 0.833              | 0.284 | <i>E</i> | 6              | 0.238                   | -0.049 – 0.525               | 0.228 | <i>B</i> | n.s.                                               |  |
| Ursidae               | 7                      | 1.315    | 0.225 – 4.209                | -0.188                   | -0.290 – -0.035            | 0.773 | -        | 6              | -0.187                  | -0.337 – -0.037              | 0.765 | -        | ×                                                  |  |
| Felidae               | 26                     | 0.036    | 0.005 – 0.055                | 0.109                    | 0.064 – 0.331              | 0.302 | <i>E</i> | 25             | -0.137                  | -0.195 – -0.079              | 0.048 | -        | n.s.                                               |  |
| Herpestidae           | 12                     | 0.496    | 0.288 – 11.350               | -0.195                   | -0.634 – -0.112            | 0.503 | -        | 11             | -0.188                  | -0.310 – -0.066              | 0.422 | -        | n.s.                                               |  |
| Eupleridae            | 5                      | 0.016    | $1.42 \cdot 10^{-4}$ – 0.471 | 0.243                    | -0.279 – 0.902             | 0.851 | <i>B</i> |                |                         |                              |       |          |                                                    |  |
| Viverridae            | 14                     | 0.384    | -0.715 – 0.975               | -0.145                   | -0.544 – -0.060            | 0.143 | -        | 13             | -0.176                  | -0.284 – -0.068              | 0.260 | -        | n.s.                                               |  |
| <b>Locomotor type</b> |                        |          |                              |                          |                            |       |          |                |                         |                              |       |          |                                                    |  |
| arboreal              | 7                      | 0.019    | $4.10 \cdot 10^{-4}$ – 0.460 | 0.227                    | -0.179 – 0.689             | 0.379 | <i>B</i> | 6              | -0.203                  | -0.453 – 0.047               | 0.114 | <i>B</i> | n.s.                                               |  |
| semiarboreal          | 10                     | 0.017    | $1.99 \cdot 10^{-4}$ – 0.087 | 0.245                    | 0.022 – 0.855              | 0.278 | <i>E</i> | 9              | 0.269                   | 0.063 – 0.475                | 0.404 | <i>E</i> | n.s.                                               |  |
| scansorial            | 45                     | 0.033    | 0.026 – 0.042                | 0.130                    | 0.102 – 0.156              | 0.428 | <i>E</i> | 44             | 0.142                   | 0.099 – 0.185                | 0.130 | <i>E</i> | n.s.                                               |  |
| terrestrial           | 48                     | 0.393    | 0.272 – 0.527                | -0.165                   | -0.205 – -0.116            | 0.539 | -        | 47             | -0.175                  | -0.226 – -0.124              | 0.164 | <i>G</i> | n.s.                                               |  |
| semifossorial         | 7                      | 0.069    | 0.010 – 0.130                | 0.101                    | 0.021 – 0.351              | 0.263 | <i>E</i> | 6              | 0.118                   | -0.026 – 0.262               | 0.163 | <i>B</i> | n.s.                                               |  |
| semiaquatic           | 11                     | 0.038    | 0.028 – 0.073                | 0.148                    | 0.070 – 0.187              | 0.811 | <i>E</i> | 10             | 0.154                   | 0.055 – 0.253                | 0.546 | <i>E</i> | n.s.                                               |  |
| aquatic               | 8                      | 0.041    | $1.73 \cdot 10^{-4}$ – 0.226 | 0.118                    | -0.029 – 0.571             | 0.122 | <i>B</i> | 7              | 0.148                   | $4.25 \cdot 10^{-4}$ – 0.296 | 0.320 | <i>E</i> | n.s.                                               |  |

| SR28 – % <sub>prox</sub> | traditional regression |               |                            |                          |                            |              |          | PIC regression |                         |                                |       |          |                                                    |  |
|--------------------------|------------------------|---------------|----------------------------|--------------------------|----------------------------|--------------|----------|----------------|-------------------------|--------------------------------|-------|----------|----------------------------------------------------|--|
|                          | n                      | <i>a</i>      | 95% CI <sub><i>a</i></sub> | <i>b</i> <sub>trad</sub> | 95% CI <sub><i>b</i></sub> | R            | sim.     | n              | <i>b</i> <sub>PIC</sub> | 95% CI <sub><i>b</i></sub>     | R     | sim.     | <i>b</i> <sub>trad</sub> ≠ <i>b</i> <sub>PIC</sub> |  |
| <b>whole sample</b>      | 137                    | 16.881        | 15.596 – 18.365            | 0.058                    | 0.048 – 0.067              | 0.416        | +        | 136            | 0.066                   | 0.055 – 0.077                  | 0.240 | +        | ×                                                  |  |
| <b>fissipeds</b>         | <i>130</i>             | <i>17.894</i> | <i>16.368 – 19.789</i>     | <i>0.050</i>             | <i>0.039 – 0.060</i>       | <i>0.172</i> | +        | 129            | 0.061                   | 0.051 – 0.071                  | 0.272 | +        | n.s.                                               |  |
| <b>Family</b>            |                        |               |                            |                          |                            |              |          |                |                         |                                |       |          |                                                    |  |
| Canidae                  | 17                     | 11.899        | 1.718 – 17.783             | 0.090                    | 0.043 – 0.304              | 0.398        | +        | 16             | -0.112                  | -0.174 – -0.050                | 0.024 | -        | n.s.                                               |  |
| Mustelidae               | 32                     | 17.535        | 15.276 – 20.941            | 0.062                    | 0.041 – 0.078              | 0.529        | +        | 31             | 0.049                   | 0.032 – 0.066                  | 0.409 | +        | ×                                                  |  |
| Procyonidae              | 7                      | 7.280         | 0.619 – 29.174             | 0.154                    | -0.009 – 0.474             | 0.416        | <i>B</i> | 6              | 0.151                   | -0.023 – 0.324                 | 0.384 | <i>B</i> | n.s.                                               |  |
| Ursidae                  | 7                      | 19.134        | 9.449 – 23.714             | 0.030                    | 0.012 – 0.089              | 0.556        | +        | 6              | 0.032                   | -0.002 – 0.066                 | 0.511 | <i>B</i> | n.s.                                               |  |
| Felidae                  | 26                     | 18.184        | 16.218 – 20.654            | 0.043                    | 0.030 – 0.054              | 0.525        | +        | 25             | 0.042                   | 0.025 – 0.059                  | 0.245 | +        | n.s.                                               |  |
| Herpestidae              | 12                     | 43.421        | 39.811 – 124.738           | -0.060                   | -0.208 – -0.045            | 0.004        | -        | 11             | 0.056                   | 0.016 – 0.096                  | 0.183 | +        | n.s.                                               |  |
| Eupleridae               | 5                      | 19.996        | 10.046 – 33.963            | 0.041                    | -0.043 – 0.130             | 0.267        | <i>B</i> |                |                         |                                |       |          |                                                    |  |
| Viverridae               | 14                     | 10.940        | 1.239 – 16.482             | 0.114                    | 0.061 – 0.382              | 0.258        | +        | 13             | 0.114                   | 0.042 – 0.186                  | 0.066 | +        | n.s.                                               |  |
| <b>Locomotor type</b>    |                        |               |                            |                          |                            |              |          |                |                         |                                |       |          |                                                    |  |
| arboreal                 | 7                      | 8.619         | 0.504 – 37.239             | 0.126                    | -0.071 – 0.478             | 0.095        | <i>B</i> | 6              | -0.115                  | -0.253 – 0.023                 | 0.261 | <i>B</i> | n.s.                                               |  |
| semiarboreal             | 10                     | 17.235        | 9.829 – 25.527             | 0.056                    | -0.001 – 0.125             | 0.496        | <i>B</i> | 9              | 0.060                   | 0.030 – 0.090                  | 0.799 | +        | n.s.                                               |  |
| scansorial               | 45                     | 19.829        | 18.408 – 21.429            | 0.033                    | 0.025 – 0.041              | 0.426        | +        | 44             | 0.042                   | 0.029 – 0.055                  | 0.251 | +        | n.s.                                               |  |
| terrestrial              | 49                     | 38.380        | 35.156 – 81.283            | -0.040                   | -0.132 – -0.029            | 0.002        | -        | 48             | 0.051                   | 0.036 – 0.066                  | 0.130 | +        | n.s.                                               |  |
| semifossorial            | 7                      | 20.893        | 9.643 – 26.546             | 0.043                    | 0.016 – 0.141              | 0.346        | +        | 6              | 0.038                   | -0.008 – 0.084                 | 0.249 | <i>B</i> | n.s.                                               |  |
| semiaquatic              | 11                     | 18.143        | 15.704 – 25.942            | 0.058                    | 0.017 – 0.074              | 0.822        | +        | 10             | 0.058                   | 0.028 – 0.088                  | 0.725 | +        | ×                                                  |  |
| aquatic                  | 8                      | 20.970        | 4.901 – 36.224             | 0.046                    | 0.001 – 0.164              | 0.486        | +        | 7              | 0.049                   | -8.77·10 <sup>-4</sup> – 0.099 | 0.240 | <i>B</i> | n.s.                                               |  |

| SR29 – % <sub>mid</sub> | traditional regression |          |                            |                          |                            |       |          | PIC regression |                         |                            |       |          |                                                    |  |
|-------------------------|------------------------|----------|----------------------------|--------------------------|----------------------------|-------|----------|----------------|-------------------------|----------------------------|-------|----------|----------------------------------------------------|--|
|                         | n                      | <i>a</i> | 95% CI <sub><i>a</i></sub> | <i>b</i> <sub>trad</sub> | 95% CI <sub><i>b</i></sub> | R     | sim.     | n              | <i>b</i> <sub>PIC</sub> | 95% CI <sub><i>b</i></sub> | R     | sim.     | <i>b</i> <sub>trad</sub> ≠ <i>b</i> <sub>PIC</sub> |  |
| <b>whole sample</b>     | 137                    | 57.597   | 54.325 – 61.094            | -0.046                   | -0.053 – -0.039            | 0.595 | –        | 136            | -0.044                  | -0.050 – -0.038            | 0.508 | –        | ×                                                  |  |
| <b>fissipeds</b>        | 130                    | 53.530   | 50.699 – 55.976            | -0.037                   | -0.042 – -0.030            | 0.418 | –        | 129            | -0.039                  | -0.045 – -0.033            | 0.454 | –        | ×                                                  |  |
| <b>Family</b>           |                        |          |                            |                          |                            |       |          |                |                         |                            |       |          |                                                    |  |
| Canidae                 | 17                     | 52.881   | 44.361 – 59.704            | -0.039                   | -0.053 – -0.019            | 0.720 | –        | 16             | -0.039                  | -0.057 – -0.021            | 0.531 | –        | ×                                                  |  |
| Mustelidae              | 32                     | 51.916   | 48.529 – 55.081            | -0.031                   | -0.039 – -0.022            | 0.701 | –        | 31             | -0.028                  | -0.036 – -0.020            | 0.681 | –        | ×                                                  |  |
| Procyonidae             | 7                      | 82.092   | 44.055 – 142.561           | -0.088                   | -0.154 – -0.016            | 0.705 | –        | 6              | -0.084                  | -0.156 – -0.012            | 0.721 | –        | n.s.                                               |  |
| Ursidae                 | 7                      | 63.416   | 34.514 – 175.388           | -0.040                   | -0.127 – 0.013             | 0.290 | <i>B</i> | 6              | -0.046                  | -0.102 – 0.010             | 0.070 | <i>B</i> | n.s.                                               |  |
| Felidae                 | 26                     | 46.957   | 42.756 – 72.277            | -0.022                   | -0.068 – -0.012            | 0.193 | –        | 25             | -0.030                  | -0.042 – -0.018            | 0.328 | –        | n.s.                                               |  |
| Herpestidae             | 12                     | 53.174   | 42.756 – 86.298            | -0.043                   | -0.108 – -0.011            | 0.473 | –        | 11             | -0.040                  | -0.064 – -0.016            | 0.554 | –        | n.s.                                               |  |
| Eupleridae              | 5                      | 23.025   | 4.328 – 37.757             | 0.070                    | -0.011 – 0.309             | 0.581 | <i>B</i> |                |                         |                            |       |          |                                                    |  |
| Viverridae              | 14                     | 71.945   | 50.003 – 272.898           | -0.074                   | -0.239 – -0.030            | 0.299 | –        | 13             | -0.057                  | -0.090 – -0.024            | 0.424 | –        | n.s.                                               |  |
| <b>Locomotor type</b>   |                        |          |                            |                          |                            |       |          |                |                         |                            |       |          |                                                    |  |
| arboreal                | 7                      | 65.253   | 27.290 – 158.489           | -0.052                   | -0.158 – 0.061             | 0.184 | <i>B</i> | 6              | 0.024                   | 0.019 – 0.029              | 0.984 | +        | n.s.                                               |  |
| semiarboreal            | 10                     | 50.548   | 41.305 – 87.297            | -0.028                   | -0.099 – 0.002             | 0.017 | <i>B</i> | 9              | -0.026                  | -0.047 – -0.005            | 0.241 | –        | n.s.                                               |  |
| scansorial              | 45                     | 47.676   | 45.082 – 73.790            | -0.022                   | -0.071 – -0.016            | 0.102 | –        | 44             | -0.031                  | -0.040 – -0.022            | 0.328 | –        | n.s.                                               |  |
| terrestrial             | 49                     | 54.125   | 50.699 – 57.544            | -0.042                   | -0.050 – -0.033            | 0.720 | –        | 48             | -0.032                  | -0.040 – -0.024            | 0.508 | –        | ✓                                                  |  |
| semifossorial           | 7                      | 46.644   | 42.658 – 71.450            | -0.025                   | -0.078 – -0.012            | 0.324 | –        | 6              | -0.026                  | -0.055 – 0.003             | 0.444 | <i>B</i> | n.s.                                               |  |
| semiaquatic             | 11                     | 56.312   | 48.529 – 131.522           | -0.039                   | -0.136 – -0.018            | 0.397 | –        | 10             | 0.030                   | 0.011 – 0.049              | 0.604 | +        | n.s.                                               |  |
| aquatic                 | 8                      | 92.066   | 68.391 – 163.682           | -0.091                   | -0.139 – -0.068            | 0.929 | –        | 7              | -0.089                  | -0.137 – -0.041            | 0.857 | –        | ×                                                  |  |

| SR30 – % <sub>dist</sub> | traditional regression |          |                            |                          |                            |       |          | PIC regression |                         |                            |       |          |                                                    |  |
|--------------------------|------------------------|----------|----------------------------|--------------------------|----------------------------|-------|----------|----------------|-------------------------|----------------------------|-------|----------|----------------------------------------------------|--|
|                          | n                      | <i>a</i> | 95% CI <sub><i>a</i></sub> | <i>b</i> <sub>trad</sub> | 95% CI <sub><i>b</i></sub> | R     | sim.     | n              | <i>b</i> <sub>PIC</sub> | 95% CI <sub><i>b</i></sub> | R     | sim.     | <i>b</i> <sub>trad</sub> ≠ <i>b</i> <sub>PIC</sub> |  |
| <b>whole sample</b>      | 137                    | 22.631   | 21.429 – 24.099            | 0.044                    | 0.037 – 0.051              | 0.187 | +        | 136            | 0.050                   | 0.041 – 0.059              | 0.098 | +        | n.s.                                               |  |
| <b>fissipeds</b>         | 130                    | 21.807   | 20.464 – 23.496            | 0.050                    | 0.040 – 0.057              | 0.222 | +        | 129            | -0.063                  | -0.074 – -0.052            | 0.001 | -        | n.s.                                               |  |
| <b>Family</b>            |                        |          |                            |                          |                            |       |          |                |                         |                            |       |          |                                                    |  |
| Canidae                  | 17                     | 19.738   | 4.642 – 29.923             | 0.067                    | 0.023 – 0.231              | 0.032 | +        | 16             | 0.082                   | 0.037 – 0.127              | 0.070 | +        | n.s.                                               |  |
| Mustelidae               | 32                     | 42.374   | 37.844 – 84.333            | -0.042                   | -0.133 – -0.030            | 0.077 | -        | 31             | 0.067                   | 0.042 – 0.092              | 0.041 | +        | n.s.                                               |  |
| Procyonidae              | 7                      | 20.663   | 8.674 – 75.858             | 0.063                    | -0.088 – 0.172             | 0.475 | <i>B</i> | 6              | 0.062                   | -0.005 – 0.129             | 0.490 | <i>B</i> | n.s.                                               |  |
| Ursidae                  | 7                      | 47.610   | 34.995 – 168.267           | -0.032                   | -0.140 – -0.003            | 0.005 | -        | 6              | -0.031                  | -0.069 – 0.007             | 0.071 | <i>B</i> | n.s.                                               |  |
| Felidae                  | 26                     | 51.109   | 44.771 – 115.611           | -0.042                   | -0.131 – -0.029            | 0.331 | -        | 25             | 0.046                   | 0.027 – 0.065              | 0.035 | +        | n.s.                                               |  |
| Herpestidae              | 12                     | 18.030   | 4.642 – 22.961             | 0.082                    | 0.044 – 0.273              | 0.312 | +        | 11             | 0.076                   | 0.024 – 0.128              | 0.287 | +        | n.s.                                               |  |
| Eupleridae               | 5                      | 57.438   | 24.831 – 189.234           | -0.069                   | -0.237 – 0.062             | 0.797 | <i>B</i> |                |                         |                            |       |          |                                                    |  |
| Viverridae               | 14                     | 45.930   | 36.644 – 109.901           | -0.042                   | -0.148 – -0.011            | 0.053 | -        | 13             | 0.104                   | 0.039 – 0.169              | 0.191 | +        | n.s.                                               |  |
| <b>Locomotor type</b>    |                        |          |                            |                          |                            |       |          |                |                         |                            |       |          |                                                    |  |
| arboreal                 | 7                      | 20.142   | 3.648 – 79.433             | 0.062                    | -0.111 – 0.278             | 0.099 | <i>B</i> | 6              | 0.049                   | -0.010 – 0.108             | 0.264 | <i>B</i> | n.s.                                               |  |
| semiarboreal             | 10                     | 40.105   | 36.644 – 42.855            | -0.026                   | -0.034 – -0.014            | 0.792 | -        | 9              | 0.072                   | 0.012 – 0.132              | 0.026 | +        | n.s.                                               |  |
| scansorial               | 45                     | 45.867   | 42.658 – 80.538            | -0.032                   | -0.095 – -0.024            | 0.267 | -        | 44             | 0.048                   | 0.033 – 0.063              | 0.069 | +        | n.s.                                               |  |
| terrestrial              | 49                     | 21.434   | 19.861 – 23.933            | 0.055                    | 0.041 – 0.066              | 0.634 | +        | 48             | 0.053                   | 0.038 – 0.068              | 0.276 | +        | n.s.                                               |  |
| semifossorial            | 7                      | 44.066   | 37.325 – 95.060            | -0.040                   | -0.146 – -0.016            | 0.094 | -        | 6              | 0.029                   | -0.002 – 0.060             | 0.514 | <i>B</i> | n.s.                                               |  |
| semiaquatic              | 11                     | 51.098   | 27.925 – 80.353            | -0.064                   | -0.113 – 0.002             | 0.400 | <i>B</i> | 10             | -0.072                  | -0.088 – -0.056            | 0.957 | -        | n.s.                                               |  |
| aquatic                  | 8                      | 12.791   | 2.191 – 25.351             | 0.078                    | 0.035 – 0.226              | 0.749 | +        | 7              | 0.079                   | 0.001 – 0.157              | 0.368 | +        | n.s.                                               |  |









| <b>SR37 – d<sub>sh</sub></b> | <b>n</b> | <b>ln A</b> | <b>95% CI<sub>ln A</sub></b> | <b>C</b> | <b>95% CI<sub>C</sub></b> | <b>D</b> | <b>95% CI<sub>D</sub></b> | <b>R</b> | <b>D ≠ 1</b> |
|------------------------------|----------|-------------|------------------------------|----------|---------------------------|----------|---------------------------|----------|--------------|
| <b>whole sample</b>          | 137      | 3.985       | 3.824 – 4.146                | 0.348    | 0.246 – 0.449             | 1.023    | 0.898 – 1.149             | 0.975    | ×            |
| <b>fissipeds</b>             | 130      | 3.842       | 3.675 – 4.008                | 0.358    | 0.251 – 0.465             | 1.019    | 0.888 – 1.150             | 0.971    | ×            |
| <b>Family</b>                |          |             |                              |          |                           |          |                           |          |              |
| Canidae                      | 17       | 3.056       | 2.850 – 3.261                | 0.415    | 0.207 – 0.623             | 1.100    | 0.710 – 1.489             | 0.960    | ×            |
| Mustelidae                   | 32       | 3.047       | 2.773 – 3.321                | 0.511    | 0.251 – 0.772             | 0.838    | 0.574 – 1.101             | 0.952    | ×            |
| Procyonidae                  | 7        | 2.529       | 2.137 – 2.921                | 0.338    | -0.216 – 0.891            | 0.993    | -0.856 – 2.842            | 0.908    | ×            |
| Ursidae                      | 7        | 3.691       | 3.617 – 3.766                | 0.286    | 0.197 – 0.376             | 1.025    | 0.658 – 1.391             | 0.993    | ×            |
| Felidae                      | 26       | 3.660       | 3.522 – 3.799                | 0.384    | 0.256 – 0.512             | 1.004    | 0.811 – 1.198             | 0.985    | ×            |
| Herpestidae                  | 12       | 2.121       | 1.960 – 2.282                | 0.329    | 0.131 – 0.527             | 0.862    | 0.302 – 1.422             | 0.953    | ×            |
| Eupleridae                   | 5        | 2.545       | 2.462 – 2.629                | 0.304    | 0.214 – 0.394             | 1.596    | 1.282 – 1.910             | 0.999    | ✓ (D>1)      |
| Viverridae                   | 14       | 2.632       | 2.313 – 2.952                | 0.476    | 0.099 – 0.853             | 0.642    | 0.068 – 1.216             | 0.898    | ×            |
| <b>Locomotor type</b>        |          |             |                              |          |                           |          |                           |          |              |
| arboreal                     | 7        | 2.715       | 2.609 – 2.822                | 0.313    | 0.197 – 0.428             | 1.217    | 0.812 – 1.621             | 0.993    | ×            |
| semiarboreal                 | 10       | 2.843       | 2.628 – 3.058                | 0.511    | 0.267 – 0.755             | 0.825    | 0.480 – 1.170             | 0.983    | ×            |
| scansorial                   | 45       | 3.625       | 3.487 – 3.764                | 0.261    | 0.158 – 0.363             | 1.192    | 0.986 – 1.399             | 0.982    | ×            |
| terrestrial                  | 49       | 3.910       | 3.613 – 4.206                | 0.447    | 0.255 – 0.639             | 0.919    | 0.743 – 1.095             | 0.969    | ×            |
| semifossorial                | 7        | 2.382       | 2.136 – 2.628                | 0.215    | -0.149 – 0.580            | 1.387    | -0.184 – 2.958            | 0.964    | ×            |
| semiaquatic                  | 11       | 2.858       | 2.456 – 3.259                | 0.242    | -0.123 – 0.607            | 1.329    | 0.254 – 2.404             | 0.915    | ×            |
| aquatic                      | 8        | 4.227       | 3.651 – 4.803                | 0.716    | 0.071 – 1.361             | 0.504    | -0.054 – 1.062            | 0.936    | ×            |

| <b>SR38 – d<sub>th</sub></b> | <b>n</b> | <b>ln A</b> | <b>95% CI<sub>ln A</sub></b> | <b>C</b> | <b>95% CI<sub>C</sub></b> | <b>D</b> | <b>95% CI<sub>D</sub></b> | <b>R</b> | <b>D ≠ 1</b> |
|------------------------------|----------|-------------|------------------------------|----------|---------------------------|----------|---------------------------|----------|--------------|
| <b>whole sample</b>          | 137      | 3.808       | 3.626 – 3.990                | 0.439    | 0.312 – 0.565             | 0.915    | 0.795 – 1.035             | 0.973    | ×            |
| <b>fissipeds</b>             | 130      | 3.649       | 3.462 – 3.836                | 0.463    | 0.328 – 0.598             | 0.887    | 0.764 – 1.009             | 0.969    | ×            |
| <b>Family</b>                |          |             |                              |          |                           |          |                           |          |              |
| Canidae                      | 17       | 2.849       | 2.539 – 3.105                | 0.491    | 0.217 – 0.765             | 0.850    | 0.448 – 1.253             | 0.944    | ×            |
| Mustelidae                   | 32       | 2.379       | 2.170 – 2.588                | 0.328    | 0.138 – 0.518             | 0.933    | 0.624 – 1.242             | 0.947    | ×            |
| Procyonidae                  | 7        | 2.143       | 1.923 – 2.362                | 0.267    | -0.036 – 0.569            | 0.941    | -0.299 – 2.182            | 0.949    | ×            |
| Ursidae                      | 7        | 3.418       | 3.292 – 3.545                | 0.127    | -0.021 – 0.274            | 1.613    | 0.135 – 3.090             | 0.947    | ×            |
| Felidae                      | 26       | 3.246       | 3.103 – 3.389                | 0.315    | 0.186 – 0.444             | 1.059    | 0.819 – 1.298             | 0.980    | ×            |
| Herpestidae                  | 12       | 1.762       | 1.614 – 1.909                | 0.210    | 0.029 – 0.391             | 1.054    | 0.193 – 1.916             | 0.914    | ×            |
| Eupleridae                   | 5        | 2.246       | 1.853 – 2.638                | 0.407    | -0.116 – 0.929            | 1.074    | -0.301 – 2.450            | 0.988    | ×            |
| Viverridae                   | 14       | 2.398       | 2.152 – 2.645                | 0.490    | 0.198 – 0.781             | 0.613    | 0.192 – 1.035             | 0.939    | ×            |
| <b>Locomotor type</b>        |          |             |                              |          |                           |          |                           |          |              |
| arboreal                     | 7        | 2.403       | 2.228 – 2.577                | 0.353    | 0.183 – 0.569             | 0.841    | 0.175 – 1.507             | 0.978    | ×            |
| semiarboreal                 | 10       | 2.479       | 2.198 – 2.761                | 0.494    | 0.169 – 0.819             | 0.731    | 0.274 – 1.189             | 0.964    | ×            |
| scansorial                   | 45       | 3.435       | 3.303 – 3.566                | 0.323    | 0.217 – 0.428             | 1.076    | 0.908 – 1.244             | 0.986    | ×            |
| terrestrial                  | 49       | 3.572       | 3.289 – 3.855                | 0.436    | 0.251 – 0.621             | 0.908    | 0.734 – 1.081             | 0.968    | ×            |
| semifossorial                | 7        | 2.102       | 1.872 – 2.332                | 0.225    | -0.134 – 0.584            | 1.304    | -0.172 – 2.779            | 0.967    | ×            |
| semiaquatic                  | 11       | 2.207       | 1.906 – 2.508                | 0.202    | -0.091 – 0.495            | 1.107    | 0.111 – 2.103             | 0.893    | ×            |
| aquatic                      | 8        | 3.593       | 3.090 – 4.096                | 0.179    | -0.297 – 0.656            | 1.730    | -0.485 – 3.946            | 0.901    | ×            |

| <b>SR39 – HR</b>      | <b>n</b> | <b><i>ln A</i></b> | <b>95% CI<sub><i>ln A</i></sub></b> | <b><i>C</i></b> | <b>95% CI<sub><i>C</i></sub></b> | <b><i>D</i></b> | <b>95% CI<sub><i>D</i></sub></b> | <b><i>R</i></b> | <b><i>D</i> ≠ 1</b> |
|-----------------------|----------|--------------------|-------------------------------------|-----------------|----------------------------------|-----------------|----------------------------------|-----------------|---------------------|
| <b>whole sample</b>   | 137      | 4.224              | -25.155 – 33.603                    | 6.108           | -23.324 – 35.540                 | 0.038           | -0.144 – 0.219                   | 0.607           | ✓ ( <i>D</i> =0)    |
| <b>fissipeds</b>      | 130      | -2.049             | -2.351 – -1.746                     | 0.070           | -0.173 – 0.312                   | 0.749           | -0.633 – 2.130                   | 0.292           | ×                   |
| <b>Family</b>         |          |                    |                                     |                 |                                  |                 |                                  |                 |                     |
| Canidae               | 17       | -2.320             | -2.495 – -2.145                     | 0.032           | -0.089 – 0.152                   | 2.042           | -1.137 – 5.222                   | 0.548           | ×                   |
| Mustelidae            | 32       | -1.509             | -2.425 – -0.592                     | 0.486           | -0.484 – 1.457                   | 0.330           | -0.303 – 0.963                   | 0.620           | ✓ ( <i>D</i> =0)    |
| Procyonidae           | 7        | <i>-2.055</i>      | <i>-2.378 – -1.733</i>              | <i>0.108</i>    | <i>-0.408 – 0.624</i>            | <i>1.296</i>    | <i>-4.827 – 7.419</i>            | <i>0.681</i>    | n.s.                |
| Ursidae               | 7        | –                  | –                                   | –               | –                                | –               | –                                | –               | n.c.                |
| Felidae               | 26       | -2.026             | -2.182 – -1.871                     | 0.105           | -0.039 – 0.248                   | 1.011           | 0.219 – 1.803                    | 0.823           | ×                   |
| Herpestidae           | 12       | –                  | –                                   | –               | –                                | –               | –                                | –               | n.c.                |
| Eupleridae            | 5        | -2.118             | -2.260 – -1.977                     | 0.033           | -0.048 – 0.114                   | 2.911           | 0.284 – 5.537                    | 0.991           | ×                   |
| Viverridae            | 14       | -2.209             | -2.365 – -2.053                     | 0.078           | -0.087 – 0.242                   | 1.155           | -0.628 – 2.939                   | 0.653           | ×                   |
| <b>Locomotor type</b> |          |                    |                                     |                 |                                  |                 |                                  |                 |                     |
| arboreal              | 7        | –                  | –                                   | –               | –                                | –               | –                                | –               | n.c.                |
| semiarboreal          | 10       | -2.079             | -2.357 – -1.801                     | 0.142           | -0.163 – 0.447                   | 1.017           | -0.621 – 2.656                   | 0.806           | ×                   |
| scansorial            | 45       | -2.099             | -2.268 – -1.930                     | 0.053           | -0.080 – 0.186                   | 1.101           | -0.192 – 2.394                   | 0.616           | ×                   |
| terrestrial           | 49       | –                  | –                                   | –               | –                                | –               | –                                | –               | n.c.                |
| semifossorial         | 7        | –                  | –                                   | –               | –                                | –               | –                                | –               | n.c.                |
| semiaquatic           | 11       | <i>-1.743</i>      | <i>-2.269 – -1.217</i>              | <i>0.120</i>    | <i>-0.382 – 0.622</i>            | <i>1.171</i>    | <i>-1.742 – 4.083</i>            | <i>0.586</i>    | n.s.                |
| aquatic               | 8        | –                  | –                                   | –               | –                                | –               | –                                | –               | n.c.                |

| <b>SR40 – L<sub>r</sub></b> | <b>n</b> | <b><i>ln A</i></b> | <b>95% CI<sub><i>ln A</i></sub></b> | <b><i>C</i></b> | <b>95% CI<sub><i>C</i></sub></b> | <b><i>D</i></b> | <b>95% CI<sub><i>D</i></sub></b> | <b><i>R</i></b> | <b><i>D</i> ≠ 1</b> |
|-----------------------------|----------|--------------------|-------------------------------------|-----------------|----------------------------------|-----------------|----------------------------------|-----------------|---------------------|
| <b>whole sample</b>         | 137      | 5.470              | 5.287 – 5.653                       | 0.088           | 0.027 – 0.149                    | 1.600           | 1.277 – 1.924                    | 0.909           | ✓ ( <i>D</i> >1)    |
| <b>fissipeds</b>            | 130      | 5.654              | 5.414 – 5.894                       | 0.202           | 0.081 – 0.322                    | 1.266           | 0.990 – 1.543                    | 0.913           | ×                   |
| <b>Family</b>               |          |                    |                                     |                 |                                  |                 |                                  |                 |                     |
| Canidae                     | 17       | 5.444              | 5.060 – 5.829                       | 0.482           | 0.070 – 0.893                    | 0.854           | 0.238 – 1.471                    | 0.882           | ×                   |
| Mustelidae                  | 32       | 4.431              | 4.185 – 4.678                       | 0.184           | -0.002 – 0.370                   | 1.261           | 0.684 – 1.839                    | 0.897           | ×                   |
| Procyonidae                 | 7        | 4.667              | 4.153 – 5.182                       | 0.533           | -0.039 – 1.104                   | 0.460           | -0.227 – 1.147                   | 0.950           | ×                   |
| Ursidae                     | 7        | 5.613              | 5.534 – 5.693                       | 0.209           | 0.114 – 0.304                    | 1.285           | 0.723 – 1.846                    | 0.988           | ×                   |
| Felidae                     | 26       | 5.531              | 5.333 – 5.730                       | 0.245           | 0.066 – 0.423                    | 1.060           | 0.632 – 1.489                    | 0.941           | ×                   |
| Herpestidae                 | 12       | 4.288              | 3.934 – 4.643                       | 0.428           | -0.002 – 0.858                   | 0.727           | -0.130 – 1.584                   | 0.885           | ×                   |
| Eupleridae                  | 5        | 4.417              | 3.765 – 5.070                       | 0.155           | -0.571 – 0.881                   | 1.517           | -3.462 – 6.496                   | 0.909           | ×                   |
| Viverridae                  | 14       | 4.724              | 4.484 – 4.964                       | 0.463           | 0.183 – 0.743                    | 0.488           | 0.114 – 0.862                    | 0.944           | ✓ ( <i>D</i> <1)    |
| <b>Locomotor type</b>       |          |                    |                                     |                 |                                  |                 |                                  |                 |                     |
| arboreal                    | 7        | 4.692              | 4.306 – 5.078                       | 0.346           | -0.113 – 0.805                   | 0.943           | -0.516 – 2.402                   | 0.910           | ×                   |
| semiarboreal                | 10       | 4.678              | 4.535 – 4.821                       | 0.362           | 0.197 – 0.527                    | 0.649           | 0.386 – 1.012                    | 0.981           | ×                   |
| scansorial                  | 45       | 5.538              | 5.386 – 5.691                       | 0.173           | 0.070 – 0.276                    | 1.300           | 0.981 – 1.619                    | 0.962           | ×                   |
| terrestrial                 | 49       | 5.909              | 5.496 – 6.322                       | 0.238           | 0.049 – 0.428                    | 1.258           | 0.909 – 1.606                    | 0.946           | ×                   |
| semifossorial               | 7        | –                  | –                                   | –               | –                                | –               | –                                | –               | n.c.                |
| semiaquatic                 | 11       | –                  | –                                   | –               | –                                | –               | –                                | –               | n.c.                |
| aquatic                     | 8        | 5.395              | 5.001 – 5.788                       | 0.287           | -0.128 – 0.703                   | 1.078           | -0.026 – 2.181                   | 0.910           | ×                   |

| <b>SR41 – d<sub>sr</sub></b> | <b>n</b> | <b>ln A</b> | <b>95% CI<sub>ln A</sub></b> | <b>C</b> | <b>95% CI<sub>C</sub></b> | <b>D</b> | <b>95% CI<sub>D</sub></b> | <b>R</b> | <b>D ≠ 1</b> |
|------------------------------|----------|-------------|------------------------------|----------|---------------------------|----------|---------------------------|----------|--------------|
| <b>whole sample</b>          | 137      | 3.112       | 2.928 – 3.296                | 0.326    | 0.207 – 0.445             | 0.994    | 0.838 – 1.149             | 0.961    | ×            |
| <b>fissipeds</b>             | 130      | 3.017       | 2.824 – 3.209                | 0.363    | 0.232 – 0.494             | 0.952    | 0.797 – 1.108             | 0.956    | ×            |
| <b>Family</b>                |          |             |                              |          |                           |          |                           |          |              |
| Canidae                      | 17       | 2.466       | 2.210 – 2.721                | 0.415    | 0.152 – 0.678             | 1.039    | 0.554 – 1.525             | 0.936    | ×            |
| Mustelidae                   | 32       | 2.013       | 1.772 – 2.255                | 0.266    | 0.061 – 0.471             | 1.069    | 0.644 – 1.495             | 0.923    | ×            |
| Procyonidae                  | 7        | 1.774       | 1.352 – 2.196                | 0.374    | -0.121 – 0.869            | 0.582    | -0.450 – 1.614            | 0.918    | ×            |
| Ursidae                      | 7        | 2.780       | 2.541 – 3.018                | 0.120    | -0.138 – 0.379            | 2.206    | -0.579 – 4.992            | 0.902    | ×            |
| Felidae                      | 26       | 2.831       | 2.635 – 3.026                | 0.416    | 0.229 – 0.602             | 0.947    | 0.691 – 1.203             | 0.973    | ×            |
| Herpestidae                  | 12       | 1.528       | 1.268 – 1.789                | 0.284    | -0.037 – 0.604            | 0.976    | -0.127 – 2.079            | 0.861    | ×            |
| Eupleridae                   | 5        | 1.624       | 1.330 – 1.918                | 0.210    | -0.125 – 0.546            | 1.454    | -0.247 – 3.155            | 0.987    | ×            |
| Viverridae                   | 14       | 2.024       | 1.845 – 2.203                | 0.526    | 0.316 – 0.737             | 0.546    | 0.280 – 0.812             | 0.972    | √ (D<1)      |
| <b>Locomotor type</b>        |          |             |                              |          |                           |          |                           |          |              |
| arboreal                     | 7        | 2.059       | 1.428 – 2.689                | 0.635    | -0.149 – 1.418            | 0.367    | -0.433 – 1.167            | 0.974    | ×            |
| semiarboreal                 | 10       | 1.700       | 1.541 – 1.860                | 0.169    | 0.002 – 0.335             | 1.210    | 0.429 – 1.990             | 0.960    | ×            |
| scansorial                   | 45       | 2.864       | 2.679 – 3.050                | 0.343    | 0.186 – 0.500             | 0.989    | 0.759 – 1.219             | 0.971    | ×            |
| terrestrial                  | 49       | 3.084       | 2.776 – 3.393                | 0.336    | 0.153 – 0.519             | 1.009    | 0.781 – 1.237             | 0.959    | ×            |
| semifossorial                | 7        | 1.769       | 1.509 – 2.029                | 0.198    | -0.162 – 0.558            | 1.485    | -0.203 – 3.174            | 0.960    | ×            |
| semiaquatic                  | 11       | 2.114       | 1.746 – 2.482                | 0.309    | -0.049 – 0.668            | 1.096    | 0.301 – 1.890             | 0.926    | ×            |
| aquatic                      | 8        | 3.011       | 2.414 – 3.608                | 0.236    | -0.345 – 0.816            | 1.607    | -0.422 – 3.635            | 0.898    | ×            |
| <b>SR42 – d<sub>tr</sub></b> |          |             |                              |          |                           |          |                           |          |              |
| <b>whole sample</b>          | 137      | 4.031       | 3.757 – 4.304                | 0.590    | 0.391 – 0.789             | 0.862    | 0.725 – 1.000             | 0.963    | ×            |
| <b>fissipeds</b>             | 130      | 3.467       | 3.234 – 3.700                | 0.384    | 0.235 – 0.534             | 1.023    | 0.853 – 1.193             | 0.953    | ×            |
| <b>Family</b>                |          |             |                              |          |                           |          |                           |          |              |
| Canidae                      | 17       | 2.897       | 2.634 – 3.160                | 0.538    | 0.256 – 0.820             | 0.844    | 0.468 – 1.220             | 0.950    | ×            |
| Mustelidae                   | 32       | 2.365       | 2.088 – 2.642                | 0.580    | 0.304 – 0.856             | 0.707    | 0.474 – 0.940             | 0.950    | √ (D<1)      |
| Procyonidae                  | 7        | 1.956       | 1.574 – 2.338                | 0.315    | -0.232 – 0.861            | 1.022    | -0.970 – 3.014            | 0.901    | ×            |
| Ursidae                      | 7        | 3.330       | 2.976 – 3.685                | 0.341    | -0.083 – 0.766            | 0.927    | -0.487 – 2.341            | 0.904    | ×            |
| Felidae                      | 26       | 3.210       | 3.086 – 3.334                | 0.352    | 0.240 – 0.464             | 1.053    | 0.867 – 1.240             | 0.988    | ×            |
| Herpestidae                  | 12       | 1.592       | 0.867 – 2.318                | 0.432    | -0.391 – 1.254            | 0.472    | -0.710 – 1.653            | 0.751    | ×            |
| Eupleridae                   | 5        | 1.998       | 1.663 – 2.334                | 0.386    | -0.049 – 0.826            | 1.127    | -0.080 – 2.334            | 0.991    | ×            |
| Viverridae                   | 14       | 2.303       | 1.897 – 2.709                | 0.735    | 0.271 – 1.199             | 0.401    | 0.066 – 0.736             | 0.951    | √ (D<1)      |
| <b>Locomotor type</b>        |          |             |                              |          |                           |          |                           |          |              |
| arboreal                     | 7        | 2.194       | 1.832 – 2.557                | 0.366    | -0.061 – 0.793            | 0.967    | -0.317 – 2.250            | 0.929    | ×            |
| semiarboreal                 | 10       | 2.363       | 2.019 – 2.707                | 0.658    | 0.255 – 1.062             | 0.590    | 0.196 – 0.983             | 0.964    | √ (D<1)      |
| scansorial                   | 45       | 3.240       | 3.088 – 3.392                | 0.290    | 0.174 – 0.405             | 1.159    | 0.951 – 1.368             | 0.981    | ×            |
| terrestrial                  | 49       | 3.580       | 3.141 – 4.019                | 0.390    | 0.139 – 0.641             | 1.045    | 0.773 – 1.317             | 0.948    | ×            |
| semifossorial                | 7        | –           | –                            | –        | –                         | –        | –                         | –        | n.c.         |
| semiaquatic                  | 11       | 2.130       | 1.806 – 2.453                | 0.422    | 0.077 – 0.767             | 0.704    | 0.206 – 1.203             | 0.933    | ×            |
| aquatic                      | 8        | 4.097       | 3.622 – 4.572                | 0.444    | -0.051 – 0.939            | 1.180    | 0.314 – 2.046             | 0.952    | ×            |



| <b>SR45 – L<sub>u</sub></b>  | <b>n</b> | <b>ln A</b>  | <b>95% CI<sub>ln A</sub></b> | <b>C</b>     | <b>95% CI<sub>C</sub></b> | <b>D</b>     | <b>95% CI<sub>D</sub></b> | <b>R</b>     | <b>D ≠ 1</b>     |
|------------------------------|----------|--------------|------------------------------|--------------|---------------------------|--------------|---------------------------|--------------|------------------|
| <b>whole sample</b>          | 136      | 5.510        | 5.331 – 5.688                | 0.085        | 0.027 – 0.143             | 1.613        | 1.291 – 1.936             | 0.911        | ✓ ( <i>D</i> >1) |
| <b>fissipeds</b>             | 129      | 5.736        | 5.499 – 5.972                | 0.216        | 0.092 – 0.339             | 1.235        | 0.972 – 1.497             | 0.919        | ×                |
| <b>Family</b>                |          |              |                              |              |                           |              |                           |              |                  |
| Canidae                      | 16       | 5.491        | 5.102 – 5.881                | 0.473        | 0.054 – 0.891             | 0.869        | 0.228 – 1.511             | 0.886        | ×                |
| Mustelidae                   | 32       | 4.525        | 4.278 – 4.772                | 0.199        | 0.007 – 0.390             | 1.215        | 0.666 – 1.764             | 0.901        | ×                |
| Procyonidae                  | 7        | 4.721        | 4.162 – 5.281                | 0.540        | -0.074 – 1.155            | 0.435        | -0.256 – 1.125            | 0.947        | ×                |
| Ursidae                      | 7        | 5.703        | 5.630 – 5.776                | 0.239        | 0.151 – 0.327             | 1.115        | 0.673 – 1.557             | 0.991        | ×                |
| Felidae                      | 26       | 5.593        | 5.409 – 5.778                | 0.245        | 0.080 – 0.411             | 1.060        | 0.663 – 1.456             | 0.949        | ×                |
| Herpestidae                  | 12       | 4.305        | 4.007 – 4.603                | 0.384        | 0.019 – 0.750             | 0.824        | -0.042 – 1.689            | 0.894        | ×                |
| Eupleridae                   | 5        | 4.469        | 3.923 – 5.015                | 0.172        | -0.455 – 0.799            | 1.439        | -2.444 – 5.322            | 0.938        | ×                |
| Viverridae                   | 14       | 4.816        | 4.534 – 5.099                | 0.516        | 0.191 – 0.840             | 0.417        | 0.072 – 0.762             | 0.949        | ✓ ( <i>D</i> <1) |
| <b>Locomotor type</b>        |          |              |                              |              |                           |              |                           |              |                  |
| arboreal                     | 7        | 4.762        | 4.370 – 5.155                | 0.358        | -0.111 – 0.827            | 0.929        | -0.509 – 2.368            | 0.912        | ×                |
| semiarboreal                 | 10       | 4.779        | 4.623 – 4.934                | 0.407        | 0.226 – 0.589             | 0.633        | 0.339 – 0.926             | 0.981        | ✓ ( <i>D</i> <1) |
| scansorial                   | 45       | 5.599        | 5.452 – 5.746                | 0.172        | 0.073 – 0.271             | 1.308        | 1.000 – 1.616             | 0.964        | ×                |
| terrestrial                  | 48       | 5.986        | 5.573 – 6.400                | 0.258        | 0.060 – 0.456             | 1.219        | 0.883 – 1.554             | 0.947        | ×                |
| semifossorial                | 7        | –            | –                            | –            | –                         | –            | –                         | –            | n.c.             |
| semiaquatic                  | 11       | –            | –                            | –            | –                         | –            | –                         | –            | n.c.             |
| aquatic                      | 8        | 5.306        | 4.878 – 5.734                | 0.188        | -0.253 – 0.629            | 1.257        | -0.590 – 3.105            | 0.847        | ×                |
| <b>SR46 – d<sub>su</sub></b> |          |              |                              |              |                           |              |                           |              |                  |
| <b>whole sample</b>          | 136      | 3.585        | 3.328 – 3.843                | 0.442        | 0.260 – 0.624             | 0.901        | 0.731 – 1.071             | 0.948        | ×                |
| <b>fissipeds</b>             | 129      | 3.466        | 3.189 – 3.743                | 0.492        | 0.286 – 0.697             | 0.852        | 0.679 – 1.025             | 0.938        | ×                |
| <b>Family</b>                |          |              |                              |              |                           |              |                           |              |                  |
| Canidae                      | 16       | 2.289        | 1.984 – 2.594                | 0.378        | 0.071 – 0.685             | 1.167        | 0.529 – 1.804             | 0.918        | ×                |
| Mustelidae                   | 32       | 2.429        | 2.191 – 2.667                | 0.407        | 0.185 – 0.629             | 0.880        | 0.593 – 1.167             | 0.949        | ×                |
| Procyonidae                  | 7        | 2.100        | 1.546 – 2.655                | 0.247        | -0.720 – 1.214            | 1.498        | -3.882 – 6.877            | 0.784        | ×                |
| Ursidae                      | 7        | <i>3.249</i> | <i>2.832 – 3.667</i>         | <i>0.214</i> | <i>-0.284 – 0.712</i>     | <i>0.852</i> | <i>-1.712 – 3.416</i>     | <i>0.744</i> | n.s.             |
| Felidae                      | 26       | 3.165        | 2.952 – 3.379                | 0.424        | 0.214 – 0.633             | 0.880        | 0.604 – 1.157             | 0.964        | ×                |
| Herpestidae                  | 12       | 1.752        | 1.261 – 2.243                | 0.497        | -0.077 – 1.071            | 0.568        | -0.267 – 1.403            | 0.867        | ×                |
| Eupleridae                   | 5        | 2.057        | 1.554 – 2.560                | 0.561        | -0.239 – 1.362            | 0.661        | -0.767 – 2.090            | 0.985        | ×                |
| Viverridae                   | 14       | –            | –                            | –            | –                         | –            | –                         | –            | n.c.             |
| <b>Locomotor type</b>        |          |              |                              |              |                           |              |                           |              |                  |
| arboreal                     | 7        | 2.568        | 1.808 – 3.328                | 0.742        | -0.206 – 1.690            | 0.372        | -0.469 – 1.212            | 0.971        | ×                |
| semiarboreal                 | 10       | 2.243        | 2.008 – 2.479                | 0.384        | 0.114 – 0.655             | 0.763        | 0.267 – 1.258             | 0.961        | ×                |
| scansorial                   | 45       | 3.229        | 3.016 – 3.443                | 0.304        | 0.135 – 0.474             | 1.089        | 0.802 – 1.377             | 0.961        | ×                |
| terrestrial                  | 48       | 3.342        | 2.960 – 3.723                | 0.591        | 0.301 – 0.881             | 0.743        | 0.552 – 0.935             | 0.939        | ✓ ( <i>D</i> <1) |
| semifossorial                | 7        | 2.220        | 1.857 – 2.583                | 0.539        | -0.052 – 1.130            | 0.679        | -0.156 – 1.514            | 0.982        | ×                |
| semiaquatic                  | 11       | 2.333        | 2.067 – 2.599                | 0.323        | 0.058 – 0.589             | 1.010        | 0.458 – 1.563             | 0.955        | ×                |
| aquatic                      | 8        | 3.351        | 2.823 – 3.879                | 0.185        | -0.329 – 0.699            | 1.596        | -0.693 – 3.885            | 0.873        | ×                |



| <b>SR47 – d<sub>tu</sub></b> | <b>n</b> | <b>ln A</b> | <b>95% CI<sub>ln A</sub></b> | <b>C</b> | <b>95% CI<sub>C</sub></b> | <b>D</b> | <b>95% CI<sub>D</sub></b> | <b>R</b> | <b>D ≠ 1</b>     |
|------------------------------|----------|-------------|------------------------------|----------|---------------------------|----------|---------------------------|----------|------------------|
| <b>whole sample</b>          | 136      | 3.316       | 3.089 – 3.543                | 0.426    | 0.269 – 0.584             | 0.992    | 0.768 – 1.076             | 0.958    | ×                |
| <b>fissipeds</b>             | 129      | 3.370       | 3.108 – 3.632                | 0.585    | 0.382 – 0.788             | 0.798    | 0.657 – 0.939             | 0.953    | ✓ ( <i>D</i> <1) |
| <b>Family</b>                |          |             |                              |          |                           |          |                           |          |                  |
| Canidae                      | 16       | 2.392       | 2.067 – 2.717                | 0.443    | 0.093 – 0.793             | 0.861    | 0.291 – 1.432             | 0.906    | ×                |
| Mustelidae                   | 32       | 1.887       | 1.639 – 2.134                | 0.238    | 0.037 – 0.439             | 1.141    | 0.667 – 1.615             | 0.915    | ×                |
| Procyonidae                  | 7        | 1.677       | 1.041 – 2.314                | 0.436    | -0.262 – 1.134            | 0.432    | -0.535 – 1.400            | 0.903    | ×                |
| Ursidae                      | 7        | 3.083       | 2.751 – 3.415                | 0.133    | -0.221 – 0.486            | 2.313    | -1.158 – 5.784            | 0.870    | ×                |
| Felidae                      | 26       | 2.974       | 2.654 – 3.293                | 0.545    | 0.223 – 0.867             | 0.815    | 0.491 – 1.139             | 0.945    | ×                |
| Herpestidae                  | 12       | 1.618       | 1.269 – 1.968                | 0.422    | -0.002 – 0.846            | 0.741    | -0.126 – 1.607            | 0.884    | ×                |
| Eupleridae                   | 5        | 1.687       | 1.516 – 1.858                | 0.358    | 0.124 – 0.592             | 1.010    | 0.310 – 1.710             | 0.997    | ×                |
| Viverridae                   | 14       | 1.941       | 1.714 – 2.169                | 0.398    | 0.132 – 0.664             | 0.738    | 0.225 – 1.250             | 0.924    | ×                |
| <b>Locomotor type</b>        |          |             |                              |          |                           |          |                           |          |                  |
| arboreal                     | 7        | 1.772       | 1.455 – 2.090                | 0.222    | -0.100 – 0.543            | 1.432    | -0.149 – 3.012            | 0.926    | ×                |
| semiarboreal                 | 10       | 1.968       | 1.724 – 2.212                | 0.455    | 0.171 – 0.739             | 0.676    | 0.254 – 1.098             | 0.965    | ×                |
| scansorial                   | 45       | 3.157       | 2.877 – 3.437                | 0.512    | 0.258 – 0.766             | 0.866    | 0.627 – 1.106             | 0.962    | ×                |
| terrestrial                  | 48       | 3.313       | 2.994 – 3.631                | 0.472    | 0.262 – 0.682             | 0.901    | 0.719 – 1.083             | 0.965    | ×                |
| semifossorial                | 7        | 1.689       | 1.154 – 2.225                | 0.462    | -0.458 – 1.383            | 0.763    | -0.848 – 2.375            | 0.946    | ×                |
| semiaquatic                  | 11       | 1.814       | 1.421 – 2.207                | 0.140    | -0.204 – 0.484            | 1.436    | -0.345 – 3.217            | 0.833    | ×                |
| aquatic                      | 8        | 3.036       | 2.853 – 3.219                | 0.235    | 0.058 – 0.413             | 1.622    | 0.999 – 2.244             | 0.989    | ×                |

| <b>SR48 – O</b>       | <b>n</b> | <b>ln A</b> | <b>95% CI<sub>ln A</sub></b> | <b>C</b> | <b>95% CI<sub>C</sub></b> | <b>D</b> | <b>95% CI<sub>D</sub></b> | <b>R</b> | <b>D ≠ 1</b>     |
|-----------------------|----------|-------------|------------------------------|----------|---------------------------|----------|---------------------------|----------|------------------|
| <b>whole sample</b>   | 136      | 4.300       | 4.176 – 4.424                | 0.224    | 0.159 – 0.290             | 1.209    | 1.079 – 1.339             | 0.978    | ✓ ( <i>D</i> >1) |
| <b>fissipeds</b>      | 129      | 4.199       | 4.064 – 4.334                | 0.256    | 0.180 – 0.331             | 1.163    | 1.029 – 1.297             | 0.975    | ✓ ( <i>D</i> >1) |
| <b>Family</b>         |          |             |                              |          |                           |          |                           |          |                  |
| Canidae               | 16       | 3.667       | 3.465 – 3.868                | 0.394    | 0.185 – 0.603             | 1.048    | 0.642 – 1.454             | 0.959    | ×                |
| Mustelidae            | 32       | 3.305       | 3.122 – 3.488                | 0.324    | 0.168 – 0.480             | 1.059    | 0.793 – 1.324             | 0.967    | ×                |
| Procyonidae           | 7        | 2.837       | 2.325 – 3.348                | 0.294    | -0.482 – 1.071            | 1.155    | -2.079 – 4.389            | 0.831    | ×                |
| Ursidae               | 7        | 4.395       | 2.809 – 5.982                | 0.608    | -1.027 – 2.242            | 0.225    | -0.664 – 1.113            | 0.927    | ×                |
| Felidae               | 26       | 4.192       | 4.069 – 4.315                | 0.385    | 0.268 – 0.501             | 0.969    | 0.795 – 1.143             | 0.987    | ×                |
| Herpestidae           | 12       | 2.711       | 2.556 – 2.866                | 0.325    | 0.134 – 0.515             | 0.984    | 0.409 – 1.558             | 0.956    | ×                |
| Eupleridae            | 5        | 3.001       | 2.629 – 3.373                | 0.311    | -0.145 – 0.767            | 1.279    | -0.287 – 2.846            | 0.987    | ×                |
| Viverridae            | 14       | 3.117       | 2.951 – 3.283                | 0.314    | 0.138 – 0.489             | 1.141    | 0.670 – 1.612             | 0.956    | ×                |
| <b>Locomotor type</b> |          |             |                              |          |                           |          |                           |          |                  |
| arboreal              | 7        | 3.207       | 2.815 – 3.600                | 0.379    | -0.063 – 0.822            | 1.099    | -0.184 – 2.381            | 0.934    | ×                |
| semiarboreal          | 10       | 3.109       | 2.942 – 3.438                | 0.395    | 0.121 – 0.669             | 0.990    | 0.465 – 1.515             | 0.972    | ×                |
| scansorial            | 45       | 4.058       | 3.927 – 4.188                | 0.217    | 0.125 – 0.308             | 1.257    | 1.032 – 1.482             | 0.980    | ✓ ( <i>D</i> >1) |
| terrestrial           | 48       | 4.304       | 4.050 – 4.557                | 0.297    | 0.161 – 0.434             | 1.107    | 0.911 – 1.304             | 0.976    | ×                |
| semifossorial         | 7        | 3.184       | 2.952 – 3.416                | 0.403    | -0.013 – 0.820            | 0.979    | 0.063 – 1.894             | 0.985    | ×                |
| semiaquatic           | 11       | 3.257       | 2.953 – 3.562                | 0.256    | -0.029 – 0.541            | 1.232    | 0.449 – 2.014             | 0.944    | ×                |
| aquatic               | 8        | 4.232       | 3.830 – 4.634                | 0.135    | -0.223 – 0.493            | 1.982    | -0.279 – 4.244            | 0.927    | ×                |



| <b>SR51 – UR</b>      | <b>n</b> | <b><i>ln A</i></b> | <b>95% CI<sub><i>ln A</i></sub></b> | <b><i>C</i></b>       | <b>95% CI<sub><i>C</i></sub></b>           | <b><i>D</i></b> | <b>95% CI<sub><i>D</i></sub></b> | <b><i>R</i></b> | <b><i>D</i> ≠ 1</b> |
|-----------------------|----------|--------------------|-------------------------------------|-----------------------|--------------------------------------------|-----------------|----------------------------------|-----------------|---------------------|
| <b>whole sample</b>   | 136      | –                  | –                                   | –                     | –                                          | –               | –                                | –               | n.c.                |
| <b>fissipeds</b>      | 129      | -2.659             | -2.749 – -2.570                     | $-5.03 \cdot 10^{-6}$ | $-8.56 \cdot 10^{-5} - 7.55 \cdot 10^{-5}$ | 5.440           | -2.626 – 13.506                  | 0.179           | ×                   |
| <b>Family</b>         |          |                    |                                     |                       |                                            |                 |                                  |                 |                     |
| Canidae               | 16       | -3.109             | -3.384 – -2.833                     | 0.012                 | -0.123 – 0.146                             | 2.720           | -6.867 – 12.306                  | 0.297           | n.s.                |
| Mustelidae            | 32       | -1.900             | -4.729 – 0.929                      | 0.409                 | -2.494 – 3.312                             | 0.161           | -1.039 – 1.362                   | 0.349           | n.s.                |
| Procyonidae           | 7        | –                  | –                                   | –                     | –                                          | –               | –                                | –               | n.c.                |
| Ursidae               | 7        | –                  | –                                   | –                     | –                                          | –               | –                                | –               | n.c.                |
| Felidae               | 26       | -2.400             | -2.966 – -1.835                     | 0.209                 | -0.414 – 0.832                             | 0.469           | -0.797 – 1.736                   | 0.475           | ×                   |
| Herpestidae           | 12       | –                  | –                                   | –                     | –                                          | –               | –                                | –               | n.c.                |
| Eupleridae            | 5        | –                  | –                                   | –                     | –                                          | –               | –                                | –               | n.c.                |
| Viverridae            | 14       | –                  | –                                   | –                     | –                                          | –               | –                                | –               | n.c.                |
| <b>Locomotor type</b> |          |                    |                                     |                       |                                            |                 |                                  |                 |                     |
| arboreal              | 7        | –                  | –                                   | –                     | –                                          | –               | –                                | –               | n.c.                |
| semiarboreal          | 10       | -2.497             | -2.756 – -2.239                     | 0.027                 | -0.244 – 0.299                             | 1.193           | -6.714 – 9.100                   | 0.315           | n.s.                |
| scansorial            | 45       | -2.336             | -2.914 – -1.758                     | 0.182                 | -0.415 – 0.779                             | 0.463           | -0.733 – 1.658                   | 0.374           | ×                   |
| terrestrial           | 48       | -3.039             | -3.337 – -2.740                     | -0.004                | -0.028 – 0.020                             | 2.605           | -0.232 – 5.441                   | 0.551           | ×                   |
| semifossorial         | 7        | –                  | –                                   | –                     | –                                          | –               | –                                | –               | n.c.                |
| semiaquatic           | 11       | -1.965             | -2.772 – -1.157                     | 0.287                 | -0.606 – 1.181                             | 0.412           | -1.062 – 1.886                   | 0.576           | n.s.                |
| aquatic               | 8        | –                  | –                                   | –                     | –                                          | –               | –                                | –               | n.c.                |

| <b>SR52 – IFA</b>     | <b>n</b> | <b><i>ln A</i></b> | <b>95% CI<sub><i>ln A</i></sub></b> | <b><i>C</i></b> | <b>95% CI<sub><i>C</i></sub></b> | <b><i>D</i></b> | <b>95% CI<sub><i>D</i></sub></b> | <b><i>R</i></b> | <b><i>D</i> ≠ 1</b> |
|-----------------------|----------|--------------------|-------------------------------------|-----------------|----------------------------------|-----------------|----------------------------------|-----------------|---------------------|
| <b>whole sample</b>   | 136      | -0.422             | -4.259 – 3.416                      | 0.992           | -2.882 – 4.866                   | 0.114           | -0.315 – 0.543                   | 0.341           | ✓ ( <i>D</i> =0)    |
| <b>fissipeds</b>      | 129      | -1.358             | -10.852 – 8.137                     | 0.235           | -9.312 – 9.782                   | 0.068           | -2.713 – 2.850                   | 0.055           | n.s.                |
| <b>Family</b>         |          |                    |                                     |                 |                                  |                 |                                  |                 |                     |
| Canidae               | 16       | -1.753             | -1.917 – -1.589                     | 0.001           | -0.018 – 0.019                   | 4.920           | -23.901 – 33.741                 | 0.237           | n.s.                |
| Mustelidae            | 32       | -1.243             | -1.575 – -0.910                     | 0.104           | -0.216 – 0.425                   | 0.795           | -0.762 – 2.352                   | 0.459           | ×                   |
| Procyonidae           | 7        | –                  | –                                   | –               | –                                | –               | –                                | –               | n.c.                |
| Ursidae               | 7        | –                  | –                                   | –               | –                                | –               | –                                | –               | n.c.                |
| Felidae               | 26       | -1.398             | -1.620 – -1.176                     | 0.142           | -0.086 – 0.370                   | 0.765           | -0.088 – 1.618                   | 0.730           | ×                   |
| Herpestidae           | 12       | –                  | –                                   | –               | –                                | –               | –                                | –               | n.c.                |
| Eupleridae            | 5        | -1.458             | -1.856 – -1.059                     | 0.162           | -0.421 – 0.745                   | 0.881           | -2.828 – 4.589                   | 0.920           | ×                   |
| Viverridae            | 14       | -1.531             | -1.628 – -1.435                     | 0.023           | -0.025 – 0.071                   | 2.685           | 0.930 – 4.440                    | 0.867           | ×                   |
| <b>Locomotor type</b> |          |                    |                                     |                 |                                  |                 |                                  |                 |                     |
| arboreal              | 7        | –                  | –                                   | –               | –                                | –               | –                                | –               | n.c.                |
| semiarboreal          | 10       | -1.557             | -1.705 – -1.409                     | 0.036           | -0.060 – 0.132                   | 2.199           | -0.092 – 4.491                   | 0.891           | ×                   |
| scansorial            | 45       | -1.552             | -1.718 – -1.386                     | 0.036           | -0.093 – 0.166                   | 1.116           | -0.750 – 2.982                   | 0.480           | ×                   |
| terrestrial           | 48       | -1.763             | -2.028 – -1.498                     | -0.010          | -0.084 – 0.064                   | 1.683           | -1.743 – 5.109                   | 0.374           | ×                   |
| semifossorial         | 7        | –                  | –                                   | –               | –                                | –               | –                                | –               | n.c.                |
| semiaquatic           | 11       | -1.047             | -1.482 – -0.613                     | 0.217           | -0.251 – 0.685                   | 0.655           | -0.628 – 1.938                   | 0.693           | ×                   |
| aquatic               | 8        | -1.027             | -1.156 – -0.899                     | 0.009           | -0.045 – 0.062                   | 3.696           | -1.901 – 9.294                   | 0.911           | ×                   |

| <b>SR53 – L<sub>m</sub></b> | <b>n</b> | <b>ln A</b> | <b>95% CI<sub>ln A</sub></b> | <b>C</b> | <b>95% CI<sub>C</sub></b> | <b>D</b> | <b>95% CI<sub>D</sub></b> | <b>R</b> | <b>D ≠ 1</b>     |
|-----------------------------|----------|-------------|------------------------------|----------|---------------------------|----------|---------------------------|----------|------------------|
| <b>whole sample</b>         | 136      | 4.449       | 4.254 – 4.644                | 0.080    | 0.017 – 0.143             | 1.620    | 1.248 – 1.993             | 0.887    | ✓ ( <i>D</i> >1) |
| <b>fissipeds</b>            | 129      | 4.566       | 4.323 – 4.810                | 0.157    | 0.045 – 0.268             | 1.356    | 1.023 – 1.690             | 0.890    | ✓ ( <i>D</i> >1) |
| <b>Family</b>               |          |             |                              |          |                           |          |                           |          |                  |
| Canidae                     | 16       | 4.589       | 4.290 – 4.888                | 0.454    | 0.135 – 0.772             | 0.930    | 0.409 – 1.451             | 0.926    | ×                |
| Mustelidae                  | 32       | 3.477       | 3.236 – 3.718                | 0.127    | -0.038 – 0.292            | 1.395    | 0.636 – 2.153             | 0.857    | ×                |
| Procyonidae                 | 7        | 3.529       | 2.596 – 4.462                | 0.513    | -0.461 – 1.487            | 0.311    | -0.513 – 1.134            | 0.912    | ×                |
| Ursidae                     | 7        | 4.505       | 4.156 – 4.855                | 0.409    | -0.003 – 0.821            | 0.707    | -0.315 – 1.730            | 0.931    | ×                |
| Felidae                     | 26       | 4.635       | 4.478 – 4.792                | 0.239    | 0.103 – 0.375             | 1.135    | 0.796 – 1.473             | 0.966    | ×                |
| Herpestidae                 | 12       | 3.492       | 3.220 – 3.764                | 0.512    | 0.188 – 0.836             | 0.642    | 0.142 – 1.141             | 0.951    | ×                |
| Eupleridae                  | 5        | 3.315       | 3.038 – 3.591                | 0.106    | -0.169 – 0.382            | 1.774    | -0.979 – 4.527            | 0.976    | ×                |
| Viverridae                  | 14       | 3.593       | 3.365 – 3.821                | 0.340    | 0.082 – 0.597             | 0.927    | 0.309 – 1.545             | 0.911    | ×                |
| <b>Locomotor type</b>       |          |             |                              |          |                           |          |                           |          |                  |
| arboreal                    | 7        | –           | –                            | –        | –                         | –        | –                         | –        | n.c.             |
| semiarboreal                | 10       | 3.699       | 3.142 – 4.256                | 0.430    | -0.221 – 1.081            | 0.620    | -0.373 – 1.613            | 0.830    | ×                |
| scansorial                  | 45       | 4.384       | 4.199 – 4.569                | 0.098    | 0.002 – 0.195             | 1.579    | 1.035 – 2.123             | 0.918    | ✓ ( <i>D</i> >1) |
| terrestrial                 | 48       | 4.942       | 4.531 – 5.353                | 0.200    | 0.024 – 0.375             | 1.325    | 0.935 – 1.715             | 0.942    | ×                |
| semifossorial               | 7        | –           | –                            | –        | –                         | –        | –                         | –        | n.c.             |
| semiaquatic                 | 11       | 3.716       | 3.269 – 4.164                | 0.369    | -0.115 – 0.852            | 0.639    | -0.134 – 1.412            | 0.844    | ×                |
| aquatic                     | 8        | 4.643       | 4.250 – 5.036                | 0.523    | 0.100 – 0.945             | 0.916    | 0.319 – 1.514             | 0.960    | ×                |

| <b>SR54 – d<sub>sm</sub></b> | <b>n</b> | <b>ln A</b> | <b>95% CI<sub>ln A</sub></b> | <b>C</b> | <b>95% CI<sub>C</sub></b> | <b>D</b> | <b>95% CI<sub>D</sub></b> | <b>R</b> | <b>D ≠ 1</b>     |
|------------------------------|----------|-------------|------------------------------|----------|---------------------------|----------|---------------------------|----------|------------------|
| <b>whole sample</b>          | 136      | 2.692       | 2.524 – 2.860                | 0.283    | 0.180 – 0.385             | 1.060    | 0.903 – 1.217             | 0.963    | ×                |
| <b>fissipeds</b>             | 129      | 2.575       | 2.397 – 2.753                | 0.296    | 0.185 – 0.407             | 1.050    | 0.884 – 1.216             | 0.957    | ×                |
| <b>Family</b>                |          |             |                              |          |                           |          |                           |          |                  |
| Canidae                      | 16       | 1.987       | 1.781 – 2.194                | 0.291    | 0.099 – 0.483             | 1.396    | 0.861 – 1.931             | 0.951    | ×                |
| Mustelidae                   | 32       | 1.717       | 1.482 – 1.952                | 0.339    | 0.125 – 0.553             | 0.933    | 0.595 – 1.270             | 0.937    | ×                |
| Procyonidae                  | 7        | 1.248       | 0.595 – 1.901                | 0.325    | -0.498 – 1.149            | 0.742    | -1.622 – 3.105            | 0.776    | ×                |
| Ursidae                      | 7        | 2.385       | 2.200 – 2.571                | 0.197    | -0.024 – 0.419            | 0.887    | -0.372 – 2.146            | 0.918    | ×                |
| Felidae                      | 26       | 2.454       | 2.348 – 2.560                | 0.320    | 0.223 – 0.418             | 1.021    | 0.844 – 1.198             | 0.988    | ×                |
| Herpestidae                  | 12       | 1.223       | 0.979 – 1.446                | 0.322    | 0.026 – 0.618             | 0.754    | -0.046 – 1.554            | 0.901    | ×                |
| Eupleridae                   | 5        | 1.196       | 0.616 – 1.776                | 0.248    | -0.379 – 0.875            | 1.586    | -1.106 – 4.278            | 0.973    | ×                |
| Viverridae                   | 14       | 1.453       | 1.204 – 1.703                | 0.345    | 0.058 – 0.631             | 0.848    | 0.183 – 1.514             | 0.892    | ×                |
| <b>Locomotor type</b>        |          |             |                              |          |                           |          |                           |          |                  |
| arboreal                     | 7        | 1.348       | 0.997 – 1.699                | 0.162    | -0.138 – 0.463            | 1.939    | -0.073 – 3.952            | 0.928    | ×                |
| semiarboreal                 | 10       | 1.700       | 1.326 – 2.075                | 0.573    | 0.133 – 1.013             | 0.589    | 0.096 – 1.081             | 0.946    | ×                |
| scansorial                   | 45       | 2.370       | 2.254 – 2.487                | 0.174    | 0.099 – 0.250             | 1.358    | 1.125 – 1.591             | 0.980    | ✓ ( <i>D</i> >1) |
| terrestrial                  | 48       | 2.587       | 2.251 – 2.923                | 0.303    | 0.108 – 0.498             | 1.034    | 0.763 – 1.305             | 0.948    | ×                |
| semifossorial                | 7        | –           | –                            | –        | –                         | –        | –                         | –        | n.c.             |
| semiaquatic                  | 11       | 1.797       | 1.445 – 2.149                | 0.343    | -0.011 – 0.696            | 0.982    | 0.293 – 1.670             | 0.929    | ×                |
| aquatic                      | 8        | 2.806       | 2.672 – 2.940                | 0.454    | 0.313 – 0.596             | 1.054    | 0.817 – 1.291             | 0.995    | ×                |





| <b>SR59 – %dist</b>   | <b>n</b> | <b>ln A</b> | <b>95% CI<sub>ln A</sub></b> | <b>C</b>             | <b>95% CI<sub>C</sub></b>                  | <b>D</b> | <b>95% CI<sub>D</sub></b> | <b>R</b> | <b>D ≠ 1</b>  |
|-----------------------|----------|-------------|------------------------------|----------------------|--------------------------------------------|----------|---------------------------|----------|---------------|
| <b>whole sample</b>   | 137      | 3.516       | 3.497 – 3.535                | $3.27 \cdot 10^{-7}$ | $-2.79 \cdot 10^{-6} - 3.44 \cdot 10^{-6}$ | 6.190    | 1.549 – 10.832            | 0.318    | ✓ ( $D > 1$ ) |
| <b>fissipeds</b>      | 130      | 3.519       | 3.498 – 3.540                | $2.68 \cdot 10^{-6}$ | $-1.93 \cdot 10^{-5} - 2.46 \cdot 10^{-5}$ | 5.354    | 1.226 – 9.482             | 0.329    | ✓ ( $D > 1$ ) |
| <b>Family</b>         |          |             |                              |                      |                                            |          |                           |          |               |
| Canidae               | 17       | 3.599       | 3.301 – 3.897                | 0.012                | -0.308 – 0.332                             | 0.372    | -11.387 – 12.132          | 0.071    | n.s.          |
| Mustelidae            | 32       | 3.425       | 3.400 – 3.450                | $4.38 \cdot 10^{-8}$ | $-1.98 \cdot 10^{-6} - 2.07 \cdot 10^{-6}$ | 8.423    | -19.191 – 36.036          | 0.235    | n.s.          |
| Procyonidae           | 7        | –           | –                            | –                    | –                                          | –        | –                         | –        | n.c.          |
| Ursidae               | 7        | –           | –                            | –                    | –                                          | –        | –                         | –        | n.c.          |
| Felidae               | 26       | 3.452       | 3.115 – 3.789                | -0.070               | -0.433 – 0.293                             | 0.278    | -1.231 – 1.787            | 0.363    | n.s.          |
| Herpestidae           | 12       | –           | –                            | –                    | –                                          | –        | –                         | –        | n.c.          |
| Eupleridae            | 5        | –           | –                            | –                    | –                                          | –        | –                         | –        | n.c.          |
| Viverridae            | 14       | –           | –                            | –                    | –                                          | –        | –                         | –        | n.c.          |
| <b>Locomotor type</b> |          |             |                              |                      |                                            |          |                           |          |               |
| arboreal              | 7        | –           | –                            | –                    | –                                          | –        | –                         | –        | n.c.          |
| semiarboreal          | 10       | –           | –                            | –                    | –                                          | –        | –                         | –        | n.c.          |
| scansorial            | 45       | 3.481       | 3.356 – 3.607                | -0.029               | -0.157 – 0.100                             | 0.485    | -1.202 – 2.171            | 0.285    | n.s.          |
| terrestrial           | 49       | 3.598       | 3.533 – 3.664                | 0.002                | -0.005 – 0.009                             | 2.400    | 0.574 – 4.226             | 0.696    | ×             |
| semifossorial         | 7        | –           | –                            | –                    | –                                          | –        | –                         | –        | n.c.          |
| semiaquatic           | 11       | –           | –                            | –                    | –                                          | –        | –                         | –        | n.c.          |
| aquatic               | 8        | 3.687       | 3.034 – 4.339                | 0.208                | -0.479 – 0.896                             | 0.249    | -0.821 – 1.318            | 0.832    | ×             |
